# Supplementary material
Source: PubMed Central journal article supplement (PMC2885219)
Supplement: supp_M109.084525_jbc.M109.084525-1.pdf [file supp_M109.084525_jbc.M109.084525-1.pdf]

Tapia et al., Supplementary Figure 1.

|     |                     |      |               |      |               |
|-----|---------------------|------|---------------|------|---------------|
| 1.  | APPRLLPPLPTC        | 62.  | no peptide    | 123. | IAATPPAYSTQY  |
| 2.  | PPLLLRPPLPTA        | 63.  | no peptide    | 124. | VPKSPPAYARSS  |
| 3.  | RPPRLLPFRPGP        | 64.  | no peptide    | 125. | VPNAPPAYEKLS  |
| 4.  | GAPRLLPPLLLL        | 65.  | no peptide    | 126. | MNWEPPAYDGGG  |
| 5.  | RAPPRLLPDQPH        | 66.  | no peptide    | 127. | VQWEPPAYDGGQ  |
| 6.  | KTPPPRPPLPTQ        | 67.  | no peptide    | 128. | ISWEPPAYTGCC  |
| 7.  | PPPPPPPLPFACC       | 68.  | no peptide    | 129. | ITWEPPAYANGP  |
| 8.  | PPPPPPPLPFQTS       | 69.  | no peptide    | 130. | QPMGPPAYHETL  |
| 9.  | PPPPPPPLPLARD       | 70.  | no peptide    | 131. | DSMAPPAYSLEY  |
| 10. | PPPPPPPLPPPPP       | 71.  | LRFGPPAYRRFS  | 132. | DSTAPPAYSLEY  |
| 11. | PPPPPPPLPSQSA       | 72.  | DKVLPPAYLEAT  | 133. | IYIIPPAYSSVV  |
| 12. | PPPPPPPLPPGAI       | 73.  | LQERPPAYNLEA  | 134. | SYVVPAYSAVN   |
| 13. | SCTRLPRAQPPL        | 74.  | LTGTPPAYLINR  | 135. | TTVVPPAYSMTV  |
| 14. | HRSRLPRAKPPPL       | 75.  | KLHIPPAYTEVK  | 136. | MTLVPPAYSAVT  |
| 15. | APRLGPRAQPAL        | 76.  | ITQTTPPAYINVL | 137. | CARVPPAYYDFW  |
| 16. | <b>CAPGRPRAQPPA</b> | 77.  | KDNIPPAYMNII  | 138. | RSAEPPAYQQGQ  |
| 17. | EPLPSPRAQPPG        | 78.  | IKRDPPAYIEEF  | 139. | GFDPPPAYHEVV  |
| 18. | YALRLPRIPPPPL       | 79.  | IRRDPPAYLFGT  | 140. | KVRQPPAYKKGA  |
| 19. | ASLCLPRYSFRR        | 80.  | YTDAPPAYSLEY  | 141. | KVRQPPAYKKGN  |
| 20. | ASECNPKYSFRR        | 81.  | RLEGPPAYVFL   | 142. | AMTSPPAYKVG   |
| 21. | <b>FHHCHPKYSFRR</b> | 82.  | AGAAPPAYEGDT  | 143. | KMTSPPAYKVG   |
| 22. | ASLCVTLLPRFS        | 83.  | ICACPPAYAGDS  | 144. | SCQLPPAYYDTR  |
| 23. | DSLCLPRQRPPM        | 84.  | TGYVPPAYLRRL  | 145. | GCLIPPAYEPWR  |
| 24. | MSLCFPRYPSEG        | 85.  | AGEDPPAYQARL  | 146. | GPPTPPAYPTEE  |
| 25. | FLLKLPRYSCKQ        | 86.  | NSRCPPAYTMVG  | 147. | AASAPPAYDNVA  |
| 26. | NLLKLPNYSKKS        | 87.  | PVYSPPAYHMHV  | 148. | WIRTPPAYRPPN  |
| 27. | FLLKLARHSKFG        | 88.  | AHDEPPAYKKNS  | 149. | APSRPPAYQAMG  |
| 28. | FMIKLPQYSSLE        | 89.  | RISRPPAYLPRS  | 150. | VDFRPPAYSFAQ  |
| 29. | FLLKLPIYIDSKR       | 90.  | RPVFPPAYWTSP  | 151. | AALPPPAYGFGQ  |
| 30. | FLLKLPKELSSSE       | 91.  | LSEDPPAYDHAI  | 152. | NVLRPPAYSPPR  |
| 31. | WVGLPPLPSARC        | 92.  | ELVYPPAYGLAQ  | 153. | ALMHPPAYPPPP  |
| 32. | WLGMPPLPSPRC        | 93.  | YRAAPPAYGRGG  | 154. | DVSKPPAYAYPA  |
| 33. | GWVLPPLPSNDI        | 94.  | PHTNPPAYEFSW  | 155. | PPCFPPAYQDPG  |
| 34. | <b>LPSLPLPARCL</b>  | 95.  | GLKRPPAYESLK  | 156. | EPCAPPAYAHPA  |
| 35. | PSRGPPLPSARG        | 96.  | GLMRPPAYCDAK  | 157. | EPATPPAYAVPY  |
| 36. | WEALPAMPTARC        | 97.  | LTAPPAYATLGG  | 158. | PGCTPPAYLLDG  |
| 37. | <b>CGLGLPRPMLL</b>  | 98.  | AQKTPPAYRQSQ  | 159. | GPGIPPAYSSPR  |
| 38. | GELGLPRPPYWG        | 99.  | RNQFPPAYGGIS  | 160. | LRHSPPAYSGPA  |
| 39. | TPDLLPRPPRLL        | 100. | RKDLPPAYGGWQ  | 161. | RFKEPPAYGPMC  |
| 40. | HGLPRPGAQMLL        | 101. | HGQIPPAYAGLA  | 162. | PAPRPPAYNRAL  |
| 41. | WGALPPRPPLLLL       | 102. | TQQIPPAYKDLA  | 163. | STFKPPAYEDVV  |
| 42. | AVLRELPRPMLL        | 103. | PDFYPPAYEESL  | 164. | SGPLPPAYSFRY  |
| 43. | ILPSPPRALFCL        | 104. | VLFPQPPAYPALG | 165. | PAEAPPAYTPQA  |
| 44. | SAQRSPPRALFCL       | 105. | LQYPPPAYPAAK  | 166. | GHSPPPAYTPMS  |
| 45. | SNSRPPRALFCL        | 106. | PASLPPAYALEL  | 167. | STPPPPAYESII  |
| 46. | TATRPPRALLCL        | 107. | KKRYPPAYGPDG  | 168. | ADTTPPAYMPPD  |
| 47. | RREPRPPRAFCL        | 108. | LAQMPPAYMKSS  | 169. | ADTTPPAYLPPE  |
| 48. | RLRALPRALFRN        | 109. | LSLLPPAYNKPS  | 170. | QFQPPPAYTPAA  |
| 49. | PRLRVLPRATGL        | 110. | RATWPPAYTFAA  | 171. | PFQPPPAYEPPA  |
| 50. | ELLRALPRAYTI        | 111. | CVKEPPAYTFRD  | 172. | TREPPPAYEPPA  |
| 51. | WRMLALALARALF       | 112. | CWREPPAYTYRD  | 173. | SYLPPPAYSPRF  |
| 52. | QLRALRAVFRSQ        | 113. | CWKEPPAYTFRD  | 174. | PLTTPPAYDVCF  |
| 53. | ALPTLPRGLFRS        | 114. | DDCQPPAYTYNN  | 175. | PLPPPPAYDDVA  |
| 54. | AAPCPPRPWQLG        | 115. | DEQEPPAYDQAP  | 176. | PPGPPPAYAPT   |
| 55. | CAPCPPRPASPV        | 116. | AMSSPPAYPGIR  | 177. | SGPPPPAYHYRN  |
| 56. | <b>ASCPPRPRRGC</b>  | 117. | DDQSPPAYPGSG  | 178. | PPPPPPAYNYGS  |
| 57. | LPAAPSPSRPWF        | 118. | DSNGPPAYWGQG  | 179. | EPppppPAYRTGS |
| 58. | LGLVDRPWQLP         | 119. | EASFPPAYPQQG  | 180. | EPppppPAYRTGC |
| 59. | AAPCQPRPTHFV        | 120. | NYSRPPAYSGVP  | 181. | PPPGPPAYDPYG  |
| 60. | no peptide          | 121. | VQPWPPAYCGCM  | 182. | YGALPPAYGPPA  |
| 61. | no peptide          | 122. | VAPWPPAYPPVT  | 183. | QTLVPPAYAPYP  |

|             |                     |      |               |      |               |
|-------------|---------------------|------|---------------|------|---------------|
| 184.        | LGlyPPAYGPIp        | 247. | RDGGPPDYGMdV  | 310. | MVSPPPDYPGEF  |
| 185.        | EFCSPPAYATLT        | 248. | NfelPPDyPSSS  | 311. | QTQgPPDyPRFV  |
| 186.        | CCPRPPAYPSAG        | 249. | NSVLPPDyDSNP  | 312. | VPDNPPDyQKYy  |
| 187.        | ACPPPPAYCNTP        | 250. | TTELPPDyLTSP  | 313. | QAENPPDySEYL  |
| 188.        | EKVLPPCYRQEP        | 251. | PPRPPDyLRGG   | 314. | GENSPPDySEYM  |
| 189.        | EQAQPPCYYGIG        | 252. | DCRDPPDyWTIH  | 315. | REmVPPDyYYSY  |
| 190.        | LKRVPpCYLGNs        | 253. | AAAIppDyLLDL  | 316. | VASRPPDyYYGM  |
| 191.        | LRQPPpCYLTAW        | 254. | NAHIppDyLLKI  | 317. | AKVDPpEYMLEL  |
| 192.        | SPHLPPCYQHFN        | 255. | PDALPPDySVVR  | 318. | LHFFPpEYGEVA  |
| 193.        | SCTSPpCYNFDG        | 256. | ADALPPDySVVR  | 319. | NHLLPpEYTRTL  |
| 194.        | SQSAPPpCYPRWW       | 257. | SPAAPPDyMDTR  | 320. | KHRQPpEYNPND  |
| 195.        | CNSDPPpCYEFLW       | 258. | AGALPPDyVDAS  | 321. | DRKLPpEYNLPH  |
| 196.        | PGQAPPpCYAPTY       | 259. | AGALPPDyMESN  | 322. | GARIPpEYTVSH  |
| 197.        | PCNRPPpCYVPCT       | 260. | AGALPPDyLDTR  | 323. | YEVAPpEYHRKA  |
| 198.        | TPEAPPpCYMDVI       | 261. | AGALPPDyLDSR  | 324. | TCICPpEYMQVN  |
| 199.        | SMTIPpCYETAS        | 262. | KAAAPPDySKTR  | 325. | TCLCPpEYTGEL  |
| 200.        | SLYLPPpCYDDAA       | 263. | TWVRPPDyTTPV  | 326. | YCEGPpEYKKRK  |
| 201.        | PLESPpCYEDAL        | 264. | RVEEPPDySLHW  | 327. | LCIGPpEYQEKK  |
| 202.        | DMSKPPpCYEEAV       | 265. | QASSPPDyTMAW  | 328. | FCSCPpEYFLHD  |
| 203.        | SLTTPPpCYQSVL       | 266. | PARKPPDyNVAL  | 329. | FCAMPpEYKGHQ  |
| 204.        | PNECPpCYDTKA        | 267. | PEMSPPDySMAL  | 330. | PMLCPpEYMVCF  |
| 205.        | AIFCPpCYDvRY        | 268. | THLKPPDySVAV  | 331. | LLRLPpEYEKEL  |
| 206.        | PNSNPPpCYKTMD       | 269. | LPGGPPDyNTAL  | 332. | ILRLPpEYASTV  |
| 207.        | PEELPPpCYEGTD       | 270. | TPIKPPDyNSRL  | 333. | TLILPpEYSSWG  |
| 208.        | PYWAPPpCYTLKP       | 271. | GLACPPDySLVV  | 334. | LLPQPpEYGSTG  |
| 209.        | ADETPPpCYLSS        | 272. | RLTCPPDyTLTL  | 335. | SKNLPpEYDTHG  |
| 210.        | HSLYPPpCYVHDV       | 273. | RPACPPDyTLAL  | 336. | LTWEPpEYDGGa  |
| 211.        | HTGFPPpCYVDIA       | 274. | RTACPPDyTLAM  | 337. | VVWNPpEYDGGK  |
| 212.        | DMYAPPDyASTF        | 275. | EIGNPPDyRGQS  | 338. | ISWNPpEYDGGC  |
| 213.        | HRyRPPDyRDLI        | 276. | GYGYPPDyYGYE  | 339. | ARQNPpEYSGAY  |
| 214.        | VDNEPPDyKSLI        | 277. | SGDLPPDyWAAA  | 340. | DDTIPpEYRHLL  |
| 215.        | AYDSPPDyLQTV        | 278. | FTVIppDyWGQg  | 341. | TTELpPpEYLTSP |
| 216.        | WIRNPPDyHQFK        | 279. | RISCPpDyWGQg  | 342. | PGCHPpEYgQPA  |
| 217.        | DyRNPPDyNFSE        | 280. | YgCEppDyWGQA  | 343. | KgCKPpEYrNYQ  |
| 218.        | LAIPppDyGAAS        | 281. | GQQLppDyWGrg  | 344. | IDCTPpEYILPG  |
| 219.        | LAIPppDyGTAS        | 282. | GVLpppDyWGQg  | 345. | HLDPpPpEYEDIV |
| 220.        | SEQFppDyDQQV        | 283. | GSGAPPDyWGQg  | 346. | NNWAPpEYLYLS  |
| 221.        | PIMYppDyCVFA        | 284. | AAMRppDyWGQg  | 347. | ALGGPpEYLGQR  |
| 222.        | RMTSPpDyRVGD        | 285. | QgKQppDyWGQg  | 348. | YANPPpEYWGQg  |
| 223.        | ERAQppDyTFPS        | 286. | DGSYppDyWGQg  | 349. | GALQPpEYpWmK  |
| 224.        | LQSRppDyESRT        | 287. | SSWYppDyWGQg  | 350. | AVSHPpEYVWLR  |
| 225.        | LMESppDySAAP        | 288. | QLWIppDyYHISL | 351. | GVSHPpEYVWLR  |
| 226.        | SFAEppDySPVT        | 289. | KSNLppDyYHISL | 352. | VPDVPpEYYSrC  |
| 227.        | SFAEppDySPVT        | 290. | KGNLppDyYRISL | 353. | IPGLPpEYLQVH  |
| 228.        | QYSFppDyLLCL        | 291. | MPLYppDyYLIDP | 354. | SHDHPpEYSADF  |
| 229.        | SSSNppDyRHEP        | 292. | MPTFppDyGFPE  | 355. | RPEAPpEYSEVV  |
| 230.        | CCSPppDyNSVv        | 293. | LPPLppDyGDGY  | 356. | RPDAPpEYNSHF  |
| 231.        | CVPGppDySCHC        | 294. | PSPVppDyEDEF  | 357. | RPDAPpEYSSHF  |
| 232.        | LSRPPpDyKdQR        | 295. | ECSSppDyLSPP  | 358. | RPTDPpEYNLYL  |
| <b>233.</b> | <b>CARGppDyGDYR</b> | 296. | PLLPppDyPQTM  | 359. | SPTTPpEYKALF  |
| 234.        | EETIPpDyRLEE        | 297. | TCICppDyMQVN  | 360. | DAQVPpEYVWAP  |
| 235.        | ELVHppDyNPEG        | 298. | LSKLppDyIPHE  | 361. | VNPPPpEYINTK  |
| 236.        | ELVYppDyNPEG        | 299. | LEKLppDyVPFE  | 362. | SASLPpEYQnRT  |
| 237.        | DEVTppDyQPPG        | 300. | MEKMppDyISHF  | 363. | PASLPpEYQnRT  |
| 238.        | RVLLppDySEdG        | 301. | YTQpppDyLPSE  | 364. | PHTNPpEYEFsw  |
| 239.        | PALGppDyDEdD        | 302. | LSPTppDyTRHQ  | 365. | PNSRPpEYEFFW  |
| 240.        | VDCGppDyLPSG        | 303. | AASCPpDyVPPE  | 366. | PNSNPpEYEFFW  |
| 241.        | VVIPppDyLECL        | 304. | FSQCppDyHHIH  | 367. | PNSNPpEYEFLLW |
| 242.        | IRLLppDyKIQC        | 305. | APPPppDyHHHH  | 368. | PYVEPpEYEFFW  |
| 243.        | VFRCPpDyPIHP        | 306. | KSEVppDyDKHN  | 369. | PDTRPpEYVEEY  |
| 244.        | KKPTppDyYPEC        | 307. | KCEVppDyDKHN  | 370. | RIVLPpEYPMKP  |
| 245.        | KQTNppDyLTEA        | 308. | KKFVppDyKIHR  | 371. | RISFPpEYpFKP  |
| 246.        | QRDSppDyHLLF        | 309. | KFFFppDyQVLK  | 372. | RTNWPpEYTFAA  |

|             |                     |      |               |             |                     |
|-------------|---------------------|------|---------------|-------------|---------------------|
| 373.        | YNNWPPEYTFGA        | 436. | LSDSPPFYKPSF  | 499.        | SSFFPPGYQVSF        |
| 374.        | SFSNPPEYTFGQ        | 437. | YLGNPFFYEEVE  | 500.        | NTFLPPGYKIEV        |
| 375.        | APLPPPEYPNQS        | 438. | LSGNPPFYEEVE  | 501.        | GKREPPGYRRLK        |
| 376.        | SYLPPPEYGPGM        | 439. | LCGYPPFYEEETE | 502.        | RRLEPPGYGDWQ        |
| 377.        | AQDPPEYDSPE         | 440. | LCGYPPFYDEND  | 503.        | RKDLPPGYNGWQ        |
| 378.        | PSSPPPEYVCNC        | 441. | LCGYPPFYDESD  | 504.        | RKDLPPGYGGWQ        |
| 379.        | PPYYPPEYTCSS        | 442. | LCGYPPFYSKHH  | 505.        | TVIEPPGYSDGW        |
| 380.        | PPYYPPEYCTP         | 443. | LCGYPPFYSNHG  | <b>506.</b> | <b>CAKRPPGYSSW</b>  |
| 381.        | SYNPPPEYLLSE        | 444. | LCGPPPFYSNTG  | 507.        | CAREPPGYCSSA        |
| 382.        | KFQPPPEYQLTA        | 445. | LFDTPPFYSNST  | <b>508.</b> | <b>CARAPPGYCSST</b> |
| 383.        | RYQPPPEYGVTS        | 446. | LHGLPPFYSQDV  | 509.        | HSTSPPGYTILD        |
| 384.        | RYQHPPEYGAAR        | 447. | LYGLPPFYSRNT  | 510.        | QVMYPPGYKTQG        |
| 385.        | PLQPPPEYGGVS        | 448. | GTPEPPFYCRDV  | 511.        | SANLPPGYLNLN        |
| 386.        | PRGPPPEYPFKT        | 449. | AWVQPPGYIRIV  | 512.        | QAALPPGYSNLL        |
| 387.        | HRGPPPEYPFKG        | 450. | VQIDPPGYHGGE  | 513.        | LFSVPPGYLRYT        |
| 388.        | PPVLPPPEYIPPS       | 451. | ATARPPGYEFEL  | 514.        | LSYSPPGYMPNT        |
| 389.        | PPPPPPPEYGPHA       | 452. | DLTVPPGYCTDF  | 515.        | WIIAPPGYEAYE        |
| 390.        | PNKPPPEYPGPR        | 453. | LTEAPPGYDSVH  | 516.        | WIVAPPGYQAFY        |
| 391.        | SAPQPPPEYGRP        | 454. | GGLKPPGYVQR   | 517.        | WIVAPPGYHAFY        |
| 392.        | DLPPPPPEYELAP       | 455. | AGIQPPGYLIHE  | 518.        | SENIAPPGYEVVS       |
| 393.        | DGPPPPPEYPPPP       | 456. | QGGHPPGYTSLA  | 519.        | SDSVPPGYEPIS        |
| 394.        | VKENPPFYGVIR        | 457. | TLTAPPGYRLRL  | 520.        | WENSPPGYEAAAS       |
| 395.        | EHIQPPFYSFLV        | 458. | DLSAPPGYTLTE  | 521.        | FIGSPPGYVGHHE       |
| 396.        | EDYKPPFYDVVP        | 459. | SNMQPPGYQSRH  | 522.        | LKKEPPGYEEAM        |
| 397.        | EDYRPPFYDVVP        | 460. | TAAVPPGYVAMG  | 523.        | LAFMPPGYEEDM        |
| 398.        | DKAEPPFYVGSN        | 461. | MILSPPGYWERY  | 524.        | NIQLPPGYQPPN        |
| 399.        | DKSEPPFYVGSN        | 462. | SVSEPPGYQAHS  | 525.        | NYQYPPGYSHHN        |
| 400.        | TSVSPPFYLRWI        | 463. | AALGPPGYLHSA  | 526.        | YTGLPPGYTYQF        |
| 401.        | SFPPPPFYLNCD        | 464. | MQRSPPGYGAQD  | 527.        | PQFLPPGYLSAL        |
| 402.        | STEHPPFYNIH         | 465. | QKYDPPGYLYQG  | 528.        | ATDSPPGYWGQG        |
| 403.        | SPTPPPFYGLG         | 466. | VVALPPGYLYYS  | 529.        | VAGSPPGYWGQG        |
| 404.        | NGYYPPFYMD          | 467. | MQAQPPGYRHVA  | 530.        | KLLLPPGYFPAG        |
| 405.        | KKCFPPFYPSPT        | 468. | MGLSPPGYNAWI  | 531.        | QLKVPPGYHPLD        |
| 406.        | PQCSPPFYVSY         | 469. | LGVTPPGYSAWI  | 532.        | NLRYPPGYFPRD        |
| 407.        | CTLEPPFYIVTE        | 470. | LDLVPPGYVQLE  | 533.        | KLRLPPGYFGLL        |
| 408.        | CTREPPFYIITE        | 471. | LNLAPPGYFLLL  | 534.        | LDLFPPGYSSKA        |
| 409.        | EEEEPPFYHHPF        | 472. | EKHGPPGYLGGS  | 535.        | YSSWPPGYTFGQ        |
| 410.        | YRKGPFFYHAS         | 473. | TPSAPPGYNIAV  | 536.        | YNKWPPGYTFGQ        |
| 411.        | MQLSPPFYLQEG        | 474. | SESAPPGYVIAL  | 537.        | YNNWPPGYTFGQ        |
| 412.        | WIIAPPFYTPNY        | 475. | SPMSPPGYKLV   | 538.        | LDIYPPGYSGFQ        |
| 413.        | AAMDPPFYLPTL        | 476. | KSVSPPGYAAQK  | 539.        | AMGAPPGYRPSA        |
| 414.        | KHPGPPFYVPHA        | 477. | QLWSPPGYYYGM  | 540.        | VRKVPPGYSIKV        |
| 415.        | EVEPPPFYVPEV        | 478. | VVVAPPGYVVVQ  | 541.        | LQASPPGYLTAL        |
| 416.        | ILYRPPFYSKTE        | 479. | CAVPPPGYALNF  | 542.        | IHGGPPGYAPYC        |
| 417.        | TLYSPPFYSSKG        | 480. | EKDYPPGYAFDV  | 543.        | DAPKPPGYTRFV        |
| 418.        | LIYDPPFYTAER        | 481. | SNDMPPGYNHKS  | 544.        | GSPQPPGYLTFF        |
| 419.        | AAAEPFFYKDVW        | 482. | TREQPPGYAIDT  | 545.        | HAPYPPGYQRHF        |
| 420.        | VNDVPPFYFQHL        | 483. | SRDQPPGYKKNS  | 546.        | YPDSPPGYEECV        |
| 421.        | HCDNPPFYRFTA        | 484. | TRDQPPGYKLNS  | 547.        | NPALPPGYSYTS        |
| 422.        | VIPCPPFYESDH        | 485. | QVLVPPGYGQDV  | 548.        | NPALPPGYSYTG        |
| 423.        | VQPVPPFYRSL         | 486. | ITDLPPGYLRPM  | 549.        | YPSLPPGYQNIT        |
| 424.        | VTVTPPFYHMDV        | 487. | QGNLPPGYKITL  | 550.        | YPSLPPGYQNTT        |
| <b>425.</b> | <b>LPARPPFYAPAH</b> | 488. | WAVGPPGYLLQR  | 551.        | PNPCPPGYEPDD        |
| 426.        | ATLSPPFYSTNM        | 489. | RERPPPGYSYGV  | 552.        | AQKTPPGYFPFL        |
| 427.        | SPPFPPFYSTKP        | 490. | ITAVPPGYLTCY  | 553.        | KKKRPPGYYSYL        |
| 428.        | PPPFPPFYSTKP        | 491. | EVCPPPGYGLDG  | 554.        | TIRLPPGYQVKV        |
| 429.        | SPPFPPFYSTKL        | 492. | PAKNPPGYLEDS  | 555.        | PVRMPPGYQAE         |
| 430.        | EPPQPPFYKSRT        | 493. | QGFEPFGYERTE  | 556.        | PIYVPPGYAPQV        |
| 431.        | AVGTPPFYATSI        | 494. | SGLRPPGYSRLP  | 557.        | PIHVPPGYISQV        |
| 432.        | AVGFPPFYADQP        | 495. | MVQAPPGYTLVG  | 558.        | DGHIPPGYISQE        |
| 433.        | ATGKPPFYELGE        | 496. | PLVQPPGYQDVS  | 559.        | DGHIPPGYISQL        |
| 434.        | FASVPPFYQLCF        | 497. | IGVVPPGYRSSA  | 560.        | DHLPPPGYDDMY        |
| 435.        | LLSTPPFYSA          | 498. | VNWLPPGYVVNQ  | 561.        | LCFHPPGYSEQK        |

|      |               |             |                     |      |              |
|------|---------------|-------------|---------------------|------|--------------|
| 562. | PCWFPPGYPETK  | 625.        | GPPGPPGYGPAG        | 688. | GMSVPPHYQYIP |
| 563. | PCWFPPGYPEAK  | 626.        | GPPGPPGYGSQG        | 689. | PPSSPPHYQRPV |
| 564. | AGQVPPGYSTGG  | 627.        | GPAGPPGYGPQG        | 690. | PQLSPPHYQYPY |
| 565. | LLQGPPGYTFGA  | <b>628.</b> | <b>GPPGPPGYKGF</b>  | 691. | RTPGPPHYPPPH |
| 566. | GLRGPPGYTFGS  | <b>629.</b> | <b>GPPGPPGYPGKQ</b> | 692. | KDDAPPHYPPPS |
| 567. | KTATPPGYKPGS  | 630.        | GPPGPPGYCDSS        | 693. | APPTPPHYPPHE |
| 568. | PYATPPGYGAAF  | 631.        | GARGPPGYRGPT        | 694. | PSRPPPHYPGIK |
| 569. | FSNRPPGYPSQP  | 632.        | GTRGPPGYRGPT        | 695. | PSRPPPHYPGIK |
| 570. | IQNRPPGYPNMN  | 633.        | GSAGPPGYPLQG        | 696. | PPPPPPHYPLVQ |
| 571. | FAGYPPGYPMQA  | 634.        | EDEGPPGYPEPL        | 697. | PWPPPPHYSIAL |
| 572. | DPDLPPGYVQSL  | 635.        | MYPCPPGYPYPP        | 698. | PPGLPPHYPVAV |
| 573. | AAPPPPGYHQNG  | 636.        | FSAPPPGYEQDS        | 699. | YQFTPPHYTTPP |
| 574. | LQAPPPGYTPFS  | 637.        | LCPSPPGYLCTL        | 700. | LYLPPPHYVGP  |
| 575. | LGPPPPGYHPFL  | 638.        | FCPAPPGYLRQG        | 701. | TAQPPPHYGPTQ |
| 576. | KFLPPPGYAPCY  | 639.        | CVPTPPGYEGPG        | 702. | KPGSPPHYLLRY |
| 577. | KFLPPPGYAPCH  | 640.        | LCPEPPGYTGPV        | 703. | CGLAPPHYPTLL |
| 578. | GVAHPPGYPLFT  | 641.        | FCSCPPGYILLD        | 704. | TSDSPPHYADSV |
| 579. | PLTVPPGYTFPP  | 642.        | LCGCPPGYRVG         | 705. | QKFCPPHYPDSQ |
| 580. | GVPSPPGYMSDQ  | 643.        | LCGCPPGYFRIG        | 706. | RKCVPPHYKEAE |
| 581. | SYPEPPGYTFEE  | 644.        | ACQCPPGYQKRG        | 707. | MSFHPPHYLAAR |
| 582. | SYPSPPGYIFDN  | 645.        | RCICPPGYEVKS        | 708. | QSEKPPHYLESR |
| 583. | TEPGPPGYSVSP  | 646.        | RCICPPGYSLQN        | 709. | AAAVPPHYKKLF |
| 584. | GPLPPPGYGTPL  | 647.        | QCICPPGYQLTH        | 710. | FHSVPPHYTELL |
| 585. | QRLPPPGYGRPP  | 648.        | QCECPPGYHLSE        | 711. | SGIYPPHYAAAA |
| 586. | YGAPPPGYGAPP  | 649.        | TCTCPPGYGGFH        | 712. | SSVHPPHYFFTY |
| 587. | RTGTTPPGYRSTS | 650.        | VCQCPPGYTGSS        | 713. | SAINPPHYLIY  |
| 588. | SFGTTPPGYGAAA | 651.        | NCLCPPGYTGSR        | 714. | DNTDPPHYEETS |
| 589. | AHGPPPGYGCAA  | 652.        | RCTCPPGYTGLR        | 715. | GGRAPPHYGYTF |
| 590. | SFGTTPPGYGCAA | 653.        | RCICPPGYAGDH        | 716. | ACVDPPHYEEYH |
| 591. | SFGTTPPGYGCAA | 654.        | ICLCPPGYTGEH        | 717. | AARAPPHYEQYF |
| 592. | SARPPPGYGCAA  | 655.        | HCLCPPGYGLH         | 718. | VQCFPPHYEIFK |
| 593. | TLITPPGYPNVK  | 656.        | SCTCPPGYVFRT        | 719. | EVFDPPHYELFS |
| 594. | AITTPPGYPPQG  | 657.        | QCSCPPGYRGPS        | 720. | EVFEPPHYELCT |
| 595. | SVMPPPGYPHIP  | 658.        | QCSCPPGYLGPS        | 721. | KVTLPPHYRYGM |
| 596. | AVSAPPGYPEGP  | 659.        | LCSCPPGYQGRS        | 722. | LVNMPPHYRYLC |
| 597. | IYLPPPGYQLVP  | 660.        | ECRCPPGYIGLS        | 723. | SLSFPPHYFGLQ |
| 598. | HISPPPGYPSQD  | 661.        | ECRCPPGYTGAF        | 724. | FNIPPIIYTSRA |
| 599. | PETPPPGYLSED  | 662.        | HCHCPPGYTGRY        | 725. | VKGNPPIYRFWK |
| 600. | GLTTPPGYLSED  | 663.        | SCTCPPGYTGRN        | 726. | SEYKPPIYHFYS |
| 601. | PCQPPPGYAPVP  | 664.        | LCKCPPGYSGTI        | 727. | IAMAPPIYTDVL |
| 602. | RSSPPPGYIPDE  | 665.        | ACFCPPGYIINH        | 728. | CARAPPIYDYVG |
| 603. | RSSPPPGYVPER  | 666.        | CGACPPGYSGNG        | 729. | KSEAPPIYLQVS |
| 604. | PFVPPPGYMMYT  | 667.        | CQACPPGYQGDG        | 730. | ILQWPPIYTAAR |
| 605. | PSVPPPGYMPRQ  | 668.        | CEACPPGYSGPT        | 731. | REPGPPIYAAPS |
| 606. | PLSPPPGYPTGL  | 669.        | VLIGPPHYEQT         | 732. | ARLLPPIYSLVF |
| 607. | PFGEPPGYYYR   | 670.        | VSGSPPHYFYWS        | 733. | KRFTPPIYQPKF |
| 608. | PSMGPPGYGGNP  | 671.        | DGGVPPHYVKHL        | 734. | KRFTPPIYQPKK |
| 609. | FFGCPPGYRWIA  | 672.        | LCNTPPHYHGFP        | 735. | KDDIPPIYPTSP |
| 610. | LPSCPPGYFDAR  | 673.        | IGLSPPHYGHYG        | 736. | LTFNPPIYGADV |
| 611. | LHDCPPGYFGIR  | 674.        | VTFRPPHYGAYI        | 737. | HPGNPPIYGADI |
| 612. | PPMPPPGYFGQA  | 675.        | AHQQPPHYTTSA        | 738. | LKELPPIYSQYM |
| 613. | PPPEPPGYVCSL  | 676.        | HNFEPPHYDGIE        | 739. | NGSVPPIYVPPG |
| 614. | PPSEPPGYVLSL  | 677.        | SQGLPPHYDDVE        | 740. | AEYAPPIYIAEM |
| 615. | AFQGPPGYSGYP  | 678.        | FQALPPHYGRPY        | 741. | NVIDPPIYARHI |
| 616. | FPPPPPGYNASS  | 679.        | FDWLPPHYYYYY        | 742. | EGKLPPIYKVRE |
| 617. | LPPPPPGYPAPK  | 680.        | KGSLPPHYALTV        | 743. | CTSKPPIYLQHQ |
| 618. | FEPPPPGYENVS  | 681.        | SKTVPPHYPVVC        | 744. | IYKKPPIYKQRE |
| 619. | AEAGPPGYPCPA  | 682.        | GPQGPPHYTDQP        | 745. | IYRKPPIYKQHA |
| 620. | GYPIPPGYAAFP  | 683.        | YGPPPPHYEGRR        | 746. | IYRKPPIYRQHA |
| 621. | PPPTPPGYIGIP  | 684.        | KPPLPPHYTSTA        | 747. | IYRKPPIYKQHV |
| 622. | PPPTPPGYLGIS  | 685.        | QPTPPPHYLED         | 748. | IYRKPPIYKQHR |
| 623. | GSAGPPGYPGPR  | 686.        | QQLPPPHYRTLE        | 749. | IYRKPPIYKRHG |
| 624. | GPQGPPGYGKMG  | 687.        | QQLPPPHYRSAT        | 750. | QYGDPPIYVMEN |

|             |                     |             |                     |      |               |
|-------------|---------------------|-------------|---------------------|------|---------------|
| 751.        | EYNDPPIYVTEN        | 814.        | LKMPPPKYVLWS        | 877. | ARLLPPLYSLVF  |
| 752.        | PQQYPPPIYPSHY       | 815.        | SKVKPPKYLLDS        | 878. | AQLLPPLYSLVF  |
| 753.        | PSIHPPPIYPSIH       | <b>816.</b> | <b>GCRGPPKYGSPG</b> | 879. | AHLLPPLYSLVF  |
| 754.        | PSIHPPPIYPCIH       | 817.        | SSAIPPKYVNGS        | 880. | ELFLPPLYSLVF  |
| 755.        | PSMHPPPIYPFYIY      | 818.        | PAQLPPKYQLGS        | 881. | SGRHPPLYSDHS  |
| 756.        | PCLSPPIYTTFQ        | 819.        | GGDIPPKYFVVT        | 882. | NQRGPPLYTKHN  |
| 757.        | PYLYPPPIYTITS       | 820.        | GARIPPKYEVSH        | 883. | ARMRPPLYYFDY  |
| 758.        | TSSDPPIYSRRN        | 821.        | QLETPPKYHTQI        | 884. | SATLPPLYPKSQ  |
| 759.        | PMLNPPPIYSLRN       | 822.        | LLFKPPKYHPDV        | 885. | KEYFPPLYSSSES |
| 760.        | AHAEPPIYSLRN        | 823.        | VSNQPPKYTQPS        | 886. | MTCKPPLYMGPE  |
| 761.        | DSKDPPIYSVGA        | 824.        | KGSLPPKYALEL        | 887. | AKVNPPLYTASP  |
| 762.        | QGNPPPIYVGSS        | 825.        | SVCIPPKYGYLG        | 888. | AAASPPLYSQVP  |
| 763.        | NKTYPPPIYAAAA       | 826.        | DYVAPPKYKSSL        | 889. | DAHSPPLYTYLT  |
| 764.        | NQSHPPPIYDLTA       | 827.        | GYLAPPKYLQSG        | 890. | IPPCPPLYEFCG  |
| 765.        | DGQEPPIYELTS        | 828.        | LPPFPKKYYLAM        | 891. | GKRHPPLYQAGL  |
| 766.        | PGNWPPPIYCKSD       | 829.        | PGTPPPKYNTLR        | 892. | EGLWPPLYRPRR  |
| 767.        | PHTAPPPIYLNSD       | 830.        | DGGHPPKYFHNH        | 893. | KGLWPPLYRPRR  |
| 768.        | PGTAPPPIYQLNA       | 831.        | YRSTPPLYRHAA        | 894. | SGIPPPLYTETG  |
| 769.        | AKPEPPKYGIVQ        | 832.        | VCLCPPLYTGQF        | 895. | ELSHPPLYRLPL  |
| 770.        | SPIRPPKYTYK         | 833.        | EYTFPPLYYRRA        | 896. | CHALPPLYSCPC  |
| 771.        | AETFPKKYLHYD        | 834.        | LLEDPPLYGEIL        | 897. | KPGSPPLYLLRY  |
| 772.        | QETFPKKYLHYD        | 835.        | AARQPPLYGRDL        | 898. | TPQRPPPLYLERI |
| 773.        | RCGRPPKYNASC        | 836.        | ELRLPPLYGDNL        | 899. | GSHLPPLYLDGH  |
| 774.        | KRGRPPKYNAVL        | 837.        | IEDLPPLYTLNK        | 900. | LQWEPPLYMGAG  |
| 775.        | RIGRPPKYRKIP        | 838.        | FDLAPPLYPCTL        | 901. | ITWKPPLYDGGS  |
| 776.        | RVSRPPKYAKAD        | 839.        | DRFPPPLYGSL         | 902. | LSWNPPPLYGGC  |
| 777.        | LSGVPPKYHLLP        | 840.        | LSKLPPLYLTHS        | 903. | MEAEPPLYPMAG  |
| 778.        | LDGCPPKYAKTL        | 841.        | IMQVPPLYSALK        | 904. | ASKEPPLYYGVC  |
| 779.        | LDEGPPKYTKSV        | 842.        | KCHTPPLYRMRI        | 905. | RFLPPLYSEID   |
| 780.        | PEEIPPKYCSMM        | 843.        | SLTHPPLYESVT        | 906. | RFQPPPLYSEVD  |
| 781.        | DAADPPKYVLVR        | 844.        | IQFKPPLYRQRY        | 907. | RYRPPPLYSEED  |
| 782.        | EVTIPPKYRELL        | 845.        | QVCGPPLYQLGA        | 908. | TETPPPLYVGPC  |
| 783.        | KMRSPPKYRPFL        | 846.        | LACEPPLYSVSS        | 909. | GKKPPPLYLKFH  |
| 784.        | TLAVPPKYAAAA        | 847.        | SDMKPPLYLNYL        | 910. | GDKPPPLYLCEE  |
| <b>785.</b> | <b>CMAVPPKYRHMQ</b> | 848.        | IFCPPPLYYTNL        | 911. | SKTPPPLYLPTTE |
| 786.        | FASGPPKYKDNP        | 849.        | LTSLPPLYRVQL        | 912. | PLEPPPLYLMED  |
| 787.        | ESGGPPKYSDEV        | 850.        | LSSPPPLYRITL        | 913. | HQLTPPLYNITK  |
| 788.        | NLTLPPKYNQPF        | 851.        | AEGPPPLYNTNH        | 914. | TVPKPPLYCYDV  |
| 789.        | SLLIPPKYQTPP        | 852.        | GEGDPPLYVNVN        | 915. | CPRPPPLYLMPV  |
| 790.        | FIRYPPKYSTPP        | 853.        | VYDGPPLYDDVK        | 916. | GTGIPPLYSTPP  |
| 791.        | PLFGPPKYAQTF        | 854.        | VFDGPPLYDDVK        | 917. | VPRPPPLYSHRM  |
| 792.        | FTRKPPKYERFI        | 855.        | VFNCPPLYDDVK        | 918. | RHLPPLYVLFV   |
| 793.        | FIRKPPKYERLI        | 856.        | WASAPPLYTLID        | 919. | RNLPPPLYRPFV  |
| 794.        | GSETPPKYTSAL        | 857.        | RANLPPLYALEL        | 920. | IFPKPPLYTFLP  |
| 795.        | GTEQPPKYEDVV        | 858.        | YCAKPPLYNWND        | 921. | HGPLPPLYSVSL  |
| 796.        | YSDPPKYEEIV         | 859.        | QAAFPPLYKELF        | 922. | AMPNPPLYYQPG  |
| 797.        | WKGWPPKYSTWE        | 860.        | NTLFPPLYKELF        | 923. | LMPNPPLYYQPG  |
| 798.        | LTWNPPKYDGGG        | 861.        | RLHFPPLYKELF        | 924. | HLPCPPLYSQPL  |
| 799.        | LSWGPPKYDGGG        | 862.        | CRAFPPLYEDIM        | 925. | PSPVPPLYLDDD  |
| 800.        | LKWEPPKYDGGG        | 863.        | AFRHPPLYPGPA        | 926. | PPGVPPLYGPPM  |
| 801.        | AQWLPPKYWGQG        | 864.        | STLVPPLYGETA        | 927. | EP PPPPLYLADT |
| 802.        | FPMNPPKYDKIE        | 865.        | TRGQPPLYHLRE        | 928. | RHSNPPLYPSRP  |
| 803.        | FSMNPPKYDKIE        | 866.        | YGYEPPLYEPP         | 929. | VHPPPPPLYPLRP |
| 804.        | VPSGPPKYPTAE        | 867.        | TLHAPPLYNHYS        | 930. | PVPPPPPLYPPPP |
| 805.        | YRTNPPKYPSKQ        | 868.        | CDLDPPLYLAET        | 931. | PPPPPPPLYPRRG |
| 806.        | KESVPPKYPGDS        | 869.        | PNSCPPLYVLWR        | 932. | PPPPPPPLYQRVS |
| 807.        | KKKLPPKYPHCQ        | 870.        | WYSSPPLYVYWF        | 933. | PMPIPPPLYPGSN |
| 808.        | CDSRPPKYPRKS        | 871.        | FGRVPPLYQLCF        | 934. | YLPAPPLYCQPQ  |
| 809.        | RYNWPPKYTFGQ        | 872.        | CGELPPLYGAEP        | 935. | PAPAPPLYSSLT  |
| 810.        | YGSSPPKYTFGA        | 873.        | DTDNPPLYCNPK        | 936. | LLPPPPPLYTRHR |
| 811.        | YGSPPKYTFGQ         | 874.        | SINSPPLYCDSE        | 937. | LMYPPPLYDAHE  |
| 812.        | EAFEPPKYMLMG        | 875.        | SHFLPPLYWLVF        | 938. | QLPPPPPLYRPRW |
| 813.        | EVLCPPKYLKLS        | 876.        | AQFVPPPLYSLVF       | 939. | GQVPVPLYTGSL  |

|       |               |       |               |              |                     |
|-------|---------------|-------|---------------|--------------|---------------------|
| 940.  | GLDSPPLYPSAP  | 1003. | DTPCPPNYQRDP  | 1066.        | TLKRPPPYQWDP        |
| 941.  | HGLLPPLYKSVK  | 1004. | PYANPPNYGKPD  | 1067.        | SLKRPPPYDAVH        |
| 942.  | NLENPPLYKXNHP | 1005. | PYANPPNYGNPD  | 1068.        | MYFVPPPYELSE        |
| 943.  | DMEWPPLYNRGK  | 1006. | PGPAPPNYSRPH  | 1069.        | EVEDPPPYLMMD        |
| 944.  | YNNWPPLYTFGQ  | 1007. | HLPWPPNYRCEP  | 1070.        | EVMYPPPYLDNE        |
| 945.  | YVGSPPPLYTFGP | 1008. | QFPYPPNYGTNP  | 1071.        | ELMYPPPYLGI         |
| 946.  | RSSFPPPLYSSGL | 1009. | QFFPPPNYGISQ  | 1072.        | EKINPPPYLTCE        |
| 947.  | VSQFPPLYMPGL  | 1010. | PYPLPPNYSYGL  | 1073.        | ASLGPPPYLRTE        |
| 948.  | VRQNPPLYSPGL  | 1011. | CKERPPNYPGSL  | 1074.        | VQTIPPPYVVRT        |
| 949.  | WTPYPPLYSTGM  | 1012. | CARYPPNYYDSS  | 1075.        | LLCTPPPYAHGR        |
| 950.  | WSPSPPLYEEYR  | 1013. | CAKFPPNYSNSW  | 1076.        | PYGRPPPYDRGD        |
| 951.  | SPKYPPLYPPGR  | 1014. | LPPQPPNYLGLK  | 1077.        | RHYMPPPYASLT        |
| 952.  | VPKEPPLYRDFG  | 1015. | YGMVPPNYCSGP  | 1078.        | VVSSPPPYTAYA        |
| 953.  | IPSAPPLYLDSG  | 1016. | YGMVPPNYCSQR  | 1079.        | KKKDPPPYNLTM        |
| 954.  | LQORPPLYFQAQ  | 1017. | RPEEPPNYPAAP  | 1080.        | DWQMPPPYVVLD        |
| 955.  | LRERPPLYQADE  | 1018. | SPASPPNYMYNP  | 1081.        | DWQIPPPYVVLD        |
| 956.  | GYGMPPLYPQTG  | 1019. | RFECPPNYVQVS  | 1082.        | PTFIPPPYGVLR        |
| 957.  | DRDGPPLYPWSQ  | 1020. | RLECPPNYVQVS  | 1083.        | LVTIPPPYSNQG        |
| 958.  | LQSTPPLYGWWQ  | 1021. | PTFIPPPNYRVKV | 1084.        | CARDPPPYYYDS        |
| 959.  | SYGGPPLYWQQG  | 1022. | SLWGPPNYSSSL  | 1085.        | TSWTPPPYFNES        |
| 960.  | GVWVPPMYLWVL  | 1023. | QPRVPPNYEGSD  | 1086.        | VSFPPPPYLARS        |
| 961.  | SRPEPPMYIAPI  | 1024. | AARIPPPNYQGA  | 1087.        | YFRSPPPYDQQM        |
| 962.  | DQVAPPMYIWEQ  | 1025. | PPLGPPNYLQVS  | 1088.        | VQYIPPPYGSPE        |
| 963.  | SQPAPPMYIWTL  | 1026. | PIFGPPNYAQKF  | 1089.        | ANSTPPPYERTR        |
| 964.  | LVPQPPMYLCP   | 1027. | PMFGPPNYAQKF  | 1090.        | SSTLPPPYLLEA        |
| 965.  | DILGPPMYEMEV  | 1028. | LIFGPPNYAQKF  | 1091.        | SATLPPPYLIN         |
| 966.  | LPGQPPMYSGTF  | 1029. | LSFGPPNYAQKF  | 1092.        | GSTIPPPYISSQ        |
| 967.  | GQGAPPMYQLYK  | 1030. | GPALPPNYKSSS  | 1093.        | GNSVPPPYLLAG        |
| 968.  | LVACPPMYHLMK  | 1031. | GPVGPPPNYSEGT | 1094.        | SNSFPPPYHTAS        |
| 969.  | HMQFPPMYEENS  | 1032. | GPVVPPNYSEGT  | 1095.        | SNSIPPPYTTTS        |
| 970.  | WDSEPPMYHTIE  | 1033. | GPVVPPNYSQGT  | 1096.        | GPCLPPPYVRTA        |
| 971.  | YCTLPPMYPGSS  | 1034. | ESVVPPNYSEGT  | 1097.        | GALLPPPYRVAD        |
| 972.  | KLRIPPMYPTSQ  | 1035. | QPEAPPPNYADV  | 1098.        | SLSSPPPYSDKL        |
| 973.  | RIWRPPMYQRDD  | 1036. | QSEAPPPNYADV  | 1099.        | SLGMPPPYAAHL        |
| 974.  | LVWEPPMYDGGK  | 1037. | RVIRPPNYAGPL  | 1100.        | VETCPPPYYHFQ        |
| 975.  | KSNTPPMYLQAD  | 1038. | RVFRPPNYSGTI  | 1101.        | LYGCPPPYHTFE        |
| 976.  | VHTSPPMYSLDR  | 1039. | TCECPPNYLGPY  | 1102.        | LYGCPPPYHTFK        |
| 977.  | ASLWPPMYGGRG  | 1040. | VCICPPNYTGEL  | 1103.        | LHGCPPPYHTFE        |
| 978.  | SFYFPPMYSPQQ  | 1041. | AVGMPPNYSNSM  | <b>1104.</b> | <b>LHGCPPPYHTFK</b> |
| 979.  | YNNEPPMYRKG   | 1042. | TKFIPPPNYHTPP | 1105.        | NVHLPPPYPLKE        |
| 980.  | RSNWPPMYTFGQ  | 1043. | RKYMPPPNYEIPF | 1106.        | QQGLPPPYPLSQ        |
| 981.  | GTHWPPMYTFGQ  | 1044. | SLTRPPNYFEPP  | 1107.        | GEPLPPPYSLRE        |
| 982.  | YIDWPPMYTFGQ  | 1045. | NLWLPPNYKHFP  | 1108.        | GTPLPPPYNLRE        |
| 983.  | SYSTPPMYTFGQ  | 1046. | YSLPLPPNYPLPG | 1109.        | DELQPPPYQDDS        |
| 984.  | YGSSPPMYTFGQ  | 1047. | HRKHPPNYKKPV  | 1110.        | ACFSPPPYEEIY        |
| 985.  | ITARPPMYEDYM  | 1048. | VVITPPNYYYYGM | 1111.        | YREVPPPYDMKA        |
| 986.  | AKAQPPMYDIL   | 1049. | DTEEPPNYDEEM  | 1112.        | GQHGPPPYGDSR        |
| 987.  | CARRPPMYHFDY  | 1050. | DETAPPNYDQWG  | 1113.        | SRREPPPYGYRK        |
| 988.  | FEGPPPNYINTY  | 1051. | LTSLPPNYEISE  | 1114.        | TRNSPPPYGFHL        |
| 989.  | SGNIPPPNYQYIF | 1052. | LEKLPPNYSMHS  | 1115.        | NDKKPPPYKHIK        |
| 990.  | LAIHPPNYIVLW  | 1053. | FRKAPPNYAMKK  | 1116.        | NSRKPPPYKHIK        |
| 991.  | ITYEPPNYKALD  | 1054. | TRQDPPNYSLRG  | 1117.        | SERKPPPYKHIK        |
| 992.  | SDLQPPNYYEVM  | 1055. | SGYPPPNYGMV   | 1118.        | ARARPPPYTGWV        |
| 993.  | AQRRPPNYHFRQ  | 1056. | NSGQPPNYEMLK  | 1119.        | GRKYPPPYKHFV        |
| 994.  | DKNKPPNYANGN  | 1057. | VAASPPNYEMLK  | 1120.        | ARGNPPPYDIDG        |
| 995.  | VPDYPPNYILFL  | 1058. | DSGQPPNYTLDV  | 1121.        | ARGIPPPYDFW         |
| 996.  | GSPGPPNYFDYW  | 1059. | IYRVPPNYSPI   | 1122.        | SIFLPPPYPHLL        |
| 997.  | VILEPPNYGIVT  | 1060. | IFAGPPNYPFSD  | 1123.        | FDGIPPPYDKKK        |
| 998.  | SKRPPPNYLCHL  | 1061. | IFAGPPNYPISD  | 1124.        | FDGIPPPYDKKK        |
| 999.  | ATSLPPNYSFQ   | 1062. | ESKTPPPYSVYE  | 1125.        | FDGTPPPYDKKK        |
| 1000. | HLTEPPNYCFHC  | 1063. | LQKKPPPYLRNL  | 1126.        | SDGIPPPYDKKK        |
| 1001. | ELMFPPNYDQSK  | 1064. | NAYAPPPYCSN   | 1127.        | SDGIPPPYDEKN        |
| 1002. | PGTTPPNYDSL   | 1065. | DFLDPPPYETLL  | 1128.        | EPENPPPYEAM         |

|              |                     |              |                     |              |                     |
|--------------|---------------------|--------------|---------------------|--------------|---------------------|
| 1129.        | WFSTPPPYKIHN        | 1192.        | AATPPPPYTVGA        | 1255.        | PDDPPPPYEASI        |
| 1130.        | FLSQPPPYQTHQ        | 1193.        | APLSPPPYLPHR        | 1256.        | PAELPPPYEAVV        |
| 1131.        | QHHTPPPYYSRP        | 1194.        | LPEPPPPYEFC         | 1257.        | PTGDPPPYPEIA        |
| 1132.        | HHGSPPPYNQRP        | 1195.        | SDGPPPPYEQYF        | 1258.        | PLGSPPPYEEIV        |
| 1133.        | DTEAPPPYSPIG        | 1196.        | LSWQPPPYTPTP        | 1259.        | LGHWPPPYVPVR        |
| 1134.        | TDSSPPPYSSIT        | 1197.        | LSWQPPPYTPTL        | 1260.        | PYRSPPPYVPPA        |
| 1135.        | ALGEPPPYGAAP        | 1198.        | WVPGPPPYLPRQ        | 1261.        | PMQYPPPYPAQP        |
| 1136.        | TVLPPPPYRHRN        | 1199.        | PTMTPPPYLPGP        | 1262.        | FTRPPPPYPGNI        |
| 1137.        | EKAGPPPYIKPV        | 1200.        | DSPPPPYSRGI         | 1263.        | KINPPPPYPGTI        |
| 1138.        | ERAGPPPYIKPV        | 1201.        | WREPPPPYPCIE        | 1264.        | QRSPPPPYPGNA        |
| 1139.        | AEQSPPPYSPAA        | 1202.        | NFPAPPPYPGES        | 1265.        | SVSPPPPYPGHT        |
| 1140.        | GSGQPPPYDHLF        | 1203.        | DFPAPPPYSAVT        | 1266.        | NRQPPPPYPLTA        |
| 1141.        | EGLWPPPYRPRR        | 1204.        | HTYLPPPYPGSS        | 1267.        | GPPRPPPYGYQR        |
| 1142.        | YDLPPPPYSSDT        | 1205.        | HTYLPPPYPGAP        | 1268.        | QKSPPPPYSRLS        |
| 1143.        | HDAPPPPYTSLR        | 1206.        | HTYLPPPYGFEF        | 1269.        | PESPPPPYSRLS        |
| 1144.        | FHDPPPPYTAYK        | 1207.        | PAALPPPYPGSS        | 1270.        | FPLPPPPYELPA        |
| 1145.        | GQYSPPPYSEYP        | 1208.        | VVAPPPPYMHPW        | 1271.        | GAGPPPPYPTPS        |
| 1146.        | GCIEPPPYGNNS        | 1209.        | SNTAPPPYSPSP        | 1272.        | AEYQPPPYFPPP        |
| 1147.        | RWDRPPPYVAPP        | 1210.        | SHSLPPPYGPGY        | 1273.        | CPLPPPPYQNS         |
| 1148.        | RWDRPPPYVAPP        | 1211.        | IPPCPPPYEFCG        | 1274.        | CPPPPPPYQNS         |
| 1149.        | EFVRPPPYHPKQ        | 1212.        | NPSAPPPYEDRN        | 1275.        | APPPPPPYRMHG        |
| 1150.        | PRCSPPPYHPVQ        | 1213.        | QPQPPPPYEDRN        | <b>1276.</b> | <b>PPGPPPPYHAHA</b> |
| 1151.        | SASTPPPYNPSI        | <b>1214.</b> | <b>RYSPPPPYSSHS</b> | 1277.        | PQGPPPPYHAHA        |
| 1152.        | SASAPPPYNLFI        | 1215.        | PFEKPPPYSPAA        | 1278.        | NQENPPPYPGPG        |
| 1153.        | AVWQPPPYGATK        | 1216.        | PGEKPPPYAPAA        | 1279.        | DKRPPPPYPGPG        |
| 1154.        | ASDPPPPYSDFH        | 1217.        | PGEDPPPYSPLT        | 1280.        | GQQAPPPYPGPH        |
| 1155.        | SWETPPPYPENG        | 1218.        | PLESPPPYRDE         | 1281.        | RQQAPPPYPGPH        |
| 1156.        | DQEPPPPYQEQV        | 1219.        | QNVPPPPYQDSP        | 1282.        | PSPPPPPYDSRL        |
| 1157.        | GAGSPPPYRRRK        | 1220.        | RALPPPPYTTFP        | 1283.        | PPTPPPPYSAFQ        |
| 1158.        | LSAPPPPYSEVI        | <b>1221.</b> | <b>SPPGPPPYGKRA</b> | 1284.        | PHPQPPPYGHCV        |
| 1159.        | MAEPPPPYSEVL        | 1222.        | APSPPPPYPVTP        | 1285.        | SGPQPPPYGHCV        |
| 1160.        | PQERPPPYLAVP        | 1223.        | SPQSPPPYPSVP        | <b>1286.</b> | <b>PHPHPPPYPHFT</b> |
| 1161.        | ADIGPPPYEPPG        | 1224.        | YLPFPPPYGPGQ        | 1287.        | AAPPPPPYPYLV        |
| <b>1162.</b> | <b>KRPPPPPYNCRY</b> | 1225.        | HDPYPPPYGPHY        | 1288.        | LGYPPPPYPPPA        |
| 1163.        | FYPVPPPYSVAT        | 1226.        | GPREPPPYQEPR        | 1289.        | PSHPPPPYPFGS        |
| 1164.        | ELDQPPPYSTVV        | 1227.        | EPGAPPPYSAPA        | 1290.        | PPYPPPPYPSGE        |
| 1165.        | PTDAPPPYSLTD        | 1228.        | SPPAPPPYKAPR        | 1291.        | QPIPPPPYHPSL        |
| 1166.        | GPGSPPPYKMIQ        | 1229.        | PGRIPPPYSCTP        | 1292.        | PPPPPPPYSGCA        |
| 1167.        | YPADPPPYIDGI        | 1230.        | PTEPPPPYSFRP        | 1293.        | PPLPPPPYLPLL        |
| 1168.        | PGQGPPPYVFMV        | 1231.        | PGTPPPPYTVAP        | 1294.        | PPVPPPPYYPPE        |
| 1169.        | DGEEPPPYQGPC        | 1232.        | YTLPPPPYPHLE        | 1295.        | PPLPPPPYYPPE        |
| 1170.        | YSPQPPPYHEL         | 1233.        | LCIQPPPYPGNI        | 1296.        | PPPPPPPYGRLL        |
| 1171.        | AGDAPPPYSSIS        | 1234.        | YPAGPPPYGHDH        | 1297.        | GPPPPPPYGRLL        |
| 1172.        | GGPAPPPYSEVA        | 1235.        | SYPPPPPYGHDH        | 1298.        | VPVPPPPYLASV        |
| 1173.        | YPPAPPPYSETD        | 1236.        | EKCVPPPYPGPV        | 1299.        | PPPPPPPYPSF         |
| 1174.        | SDPSPPPYPNVL        | 1237.        | VRGPPPPYQMT         | 1300.        | PPPPPPPYGPGR        |
| 1175.        | QRQPPPPYWRGP        | 1238.        | VRGPPPPYHSKP        | 1301.        | PPSPPPPYGPGR        |
| 1176.        | LPPEPPPYWSGI        | 1239.        | PHQQPPPYPLMH        | 1302.        | PPPHPPPYGPGR        |
| 1177.        | GYPTPPPYPFTP        | 1240.        | KTHPPPPYSPAP        | 1303.        | PPPPPPPYLASL        |
| 1178.        | ALPPPPPYVILE        | 1241.        | SSEPPPPYPGGP        | 1304.        | KLPPPPPYGRLL        |
| 1179.        | RAELPPPYTAIA        | 1242.        | VCTPPPPYPPSW        | 1305.        | SQPPPPPYYPPE        |
| 1180.        | EAGPPPPYHDAL        | 1243.        | AAAAPPPYPTDC        | 1306.        | PQPPPPPYGHKR        |
| <b>1181.</b> | <b>FPRAPPPYPTHH</b> | 1244.        | HCTPPPPYPTDC        | 1307.        | FPPPPPPYFPES        |
| 1182.        | PHTSPPPYNAPQ        | 1245.        | QCTPPPPYPTDC        | 1308.        | LPPPPPPYNHPH        |
| 1183.        | TRHPPPPYNTAK        | 1246.        | HCTPPPPYHADP        | 1309.        | LPPPPPPYHPPA        |
| 1184.        | EKEPPPPYLPA         | 1247.        | VTPFPPPYPTC         | 1310.        | LFRPPPPYPRPR        |
| 1185.        | AKEPPPPYVSAA        | 1248.        | RRCPPPPYPKHL        | 1311.        | VYRPPPPYPPPR        |
| 1186.        | SREPPPPYVTPA        | 1249.        | YQGPPPPYPKHL        | 1312.        | VLPPPPPYPPPD        |
| 1187.        | PGMNPPPYSQFL        | 1250.        | VPSPPPPYTTSH        | 1313.        | QVSPPPPYPAPQ        |
| 1188.        | CADLPPPYSPFP        | 1251.        | GPPQPPPYSDII        | 1314.        | RISPPPPYPPPK        |
| 1189.        | CNTPPPPYEQVV        | 1252.        | QDSPPPPYDTYP        | 1315.        | VQPPPPPYPGPM        |
| 1190.        | CGDPPPPYEPHC        | 1253.        | LESPPPPYSRYP        | 1316.        | IAPPPPPYTPNP        |
| 1191.        | PMKLPPPYKALT        | 1254.        | PLDPPPPYEAVV        | 1317.        | LAPPPPPYRQPP        |

|       |               |       |              |              |                     |
|-------|---------------|-------|--------------|--------------|---------------------|
| 1318. | PPSLPPPPYPQRH | 1381. | QRRDPPQYPVVP | 1444.        | SEAGPPRYLGDR        |
| 1319. | PPYFPPPPYPQPP | 1382. | PNFEPPQYPYIP | 1445.        | RDLSPPRYDSL         |
| 1320. | PPYFPPPPYQQLA | 1383. | RPADPPQYQEV  | 1446.        | KDESPPRYRPLV        |
| 1321. | PPYFPPPPYQPIY | 1384. | RGRNPPQYQRSP | 1447.        | RFQESPPRYRDI        |
| 1322. | PPYFPPPPYQPLP | 1385. | DVFRPPQYPMIL | 1448.        | RELSPPRYKLV         |
| 1323. | PGPAPPPYLPPQ  | 1386. | PAVVPPQYYGVP | 1449.        | RFSHPPRYWVPL        |
| 1324. | PSPAPPPYTPT   | 1387. | QQQMPPQYGOQ  | 1450.        | PELDPPRYKCTE        |
| 1325. | NPAAPPPYMPPQ  | 1388. | FWLMPPQYGOQ  | 1451.        | RASSPPRYLQHD        |
| 1326. | RILQPPQYFWEE  | 1389. | PQPSPPQYLSGS | 1452.        | PENKPPRYLQND        |
| 1327. | SLLQPPQYRIYQ  | 1390. | PRLSPPQYSHQV | 1453.        | PEEKPPRYIADE        |
| 1328. | QIYGPPQYNIQY  | 1391. | TSQQPPQYSHQT | 1454.        | AVLCPPRYPKLA        |
| 1329. | NYEPPQYTRIC   | 1392. | HKQEPPQYSHTS | 1455.        | QTLAPPRYPHLS        |
| 1330. | GARSPPQYCGTK  | 1393. | ADRPPQYIHPN  | 1456.        | EKLAPPRYPKLG        |
| 1331. | TLVLPPQYVDDV  | 1394. | LTRPPQYQDPT  | 1457.        | SSLSPPRYEKLD        |
| 1332. | TRVEPPQYMIDL  | 1395. | SDKAPQYREPS  | 1458.        | ATGCPPRYECSA        |
| 1333. | VIIAPPQYVTTT  | 1396. | NFVSPPQYPDYG | 1459.        | CARDPPRYCSAG        |
| 1334. | VAGLPPQYGLYS  | 1397. | PPPAPPQYPDFS | <b>1460.</b> | <b>AAGPPRYCSST</b>  |
| 1335. | GCSFPPQYSALQ  | 1398. | PPRLPPQYPGDS | <b>1461.</b> | <b>CATRPPRYSSGW</b> |
| 1336. | GFSLPPQYSGLD  | 1399. | PPVPPQYFSPA  | 1462.        | VTVAPPRYLPHS        |
| 1337. | CASAPPQYSLLK  | 1400. | LPPVPPQYQVPG | 1463.        | TGNSPPRYRLLM        |
| 1338. | ILHIPPQYLHLV  | 1401. | LPPIPPQYQVPG | 1464.        | VPKVPPRYKEPT        |
| 1339. | INDVPPQYFQHL  | 1402. | DRGKPPRYGTAL | 1465.        | RGEVPPRYPRDV        |
| 1340. | LGKLPPQYALEL  | 1403. | NLIAPPRYVMTT | 1466.        | PGSPPRYQGPV         |
| 1341. | YPCCPPQYCLNQ  | 1404. | VAQLPPRYEVTI | 1467.        | TLTTPPRYPQKL        |
| 1342. | APCCPPQYNVVQ  | 1405. | ILLMPPRYGIPF | 1468.        | RLWRPPRYPRKT        |
| 1343. | ESNYPPQYLILK  | 1406. | LLYRPPRYQIAI | 1469.        | GLAPPRYKGS          |
| 1344. | PDTVPPQYALR   | 1407. | GGGAPPRYATLE | 1470.        | RPFPPRYAAAA         |
| 1345. | QGEAPPQYLTDD  | 1408. | KTKDPPRYEEAI | 1471.        | YGSSPPRYTFAA        |
| 1346. | FEPLPPQYFIRV  | 1409. | SSHSPRYTDQG  | 1472.        | YGSSPPRYSFGA        |
| 1347. | YFHWPQYFDS    | 1410. | SHGLPPRYIMQA | 1473.        | RSNWPPRYTFAA        |
| 1348. | ATGKPPQYIAVH  | 1411. | VITSPRYGQIE  | 1474.        | YDNWPPRYSFAA        |
| 1349. | AMSSPPQYTY    | 1412. | ALLVPPRYARSE | 1475.        | YNNWPPRYTFGQ        |
| 1350. | GSPLPPQYATQF  | 1413. | FGCIPRYKLCV  | 1476.        | PAADPPRYTFAP        |
| 1351. | GTPEPPQYKSPE  | 1414. | AEQWPPRYWGAA | 1477.        | SNSDPPRYKFPW        |
| 1352. | TGLGPPQYVAQV  | 1415. | KIYEPPRYMSVN | 1478.        | PNSSPPRYEFLW        |
| 1353. | LDHQPPQYKLDP  | 1416. | PLRKPPRYSDLH | 1479.        | PNSAPPRYEFLW        |
| 1354. | CELWPPQYPSKG  | 1417. | LKAKPPRYVGLG | 1480.        | PNSDPPRYQFLW        |
| 1355. | EEELPPQYFSSE  | 1418. | ERSHPPRYRGIG | 1481.        | PNSDPPRYEFLW        |
| 1356. | ASTFPPQYLSSE  | 1419. | KEKRPPRYKGEA | 1482.        | SSSAPPRYSPPY        |
| 1357. | ELEIPPQYQAGG  | 1420. | GGAYPPRYFYPF | 1483.        | PPPPPPRYDPCA        |
| 1358. | FSCKPPQYGOLE  | 1421. | TQLRPPRYIHKA | 1484.        | QSPAPPRYDPRP        |
| 1359. | RSCTPPQYGGRP  | 1422. | TSWTPPRYVLSM | <b>1485.</b> | <b>PPSRPPRYSSS</b>  |
| 1360. | AFEAPPQYVLPT  | 1423. | MPQDPPRYQDNR | 1486.        | LATQPPRYKYTP        |
| 1361. | TKQAPPQYTFIG  | 1424. | ERITPPRYRADE | 1487.        | CLPCPPRYRGNQ        |
| 1362. | HEESPPQYQTSY  | 1425. | GFPGPPRYRSAA | 1488.        | LHPHPPRYLLLS        |
| 1363. | AQALPPQYQSII  | 1426. | FSDIPPRYPFQA | 1489.        | RAPLPPRYSNQN        |
| 1364. | SQSFPQYQEA    | 1427. | MARDPPRYLVIK | 1490.        | KSPLPPRYAAVN        |
| 1365. | QHQLPPQYQKIL  | 1428. | HFGLPPRYQPDV | 1491.        | RLPPPPRYTVPR        |
| 1366. | IAAVPPQYRKVL  | 1429. | SAINPPRYELIY | 1492.        | EPPQPPRYISIF        |
| 1367. | HQPQPPQYAPAP  | 1430. | PPFQPPRYPLML | 1493.        | RPPMPPRYPAPY        |
| 1368. | PVGYPQYPPPTA  | 1431. | SARRPPRYLLSA | 1494.        | VPPLPPRYRFRD        |
| 1369. | PLTTPPQYDEVQ  | 1432. | EVEEPPRYLLKF | 1495.        | VLPLPPRYRFRD        |
| 1370. | DITHPPQYGOIQ  | 1433. | KPGNPPRYLLYY | 1496.        | LQPPPPRYKRFS        |
| 1371. | KPGSPPQYLLSA  | 1434. | KPGSPPRYLLYY | 1497.        | RPPIPPRYRYA         |
| 1372. | KPGSPPQYLLRY  | 1435. | KPGSPPRYLLRY | 1498.        | WVRSPPSYSVLY        |
| 1373. | KPGSPPQYLLKY  | 1436. | KPESPPRYLLSY | 1499.        | SEASPPSYIVLA        |
| 1374. | KPGSPPQYLLTY  | 1437. | LLIDPPRYIQDL | 1500.        | LSRNPPSYIAPY        |
| 1375. | KPGSPPQYLLSY  | 1438. | LSILPPRYISNL | 1501.        | ASLNPPSYLLLL        |
| 1376. | KPGSPPQYLLWY  | 1439. | WSSRPPRYLSGV | 1502.        | LELHPPSYPW          |
| 1377. | KAGSPPQYLLRY  | 1440. | LDPEPPRYLQSL | 1503.        | LEVHPPSYW           |
| 1378. | KVPSPQYLLRY   | 1441. | RSTKPPRYKCGI | 1504.        | IGDVPPSYVQTK        |
| 1379. | SRGPPQYPHVV   | 1442. | RSPIPPRYLCSL | 1505.        | IYQVPPSYQNG         |
| 1380. | PQRPPQYPLLI   | 1443. | PSELPPRYEKE  | 1506.        | YQGGPPSYQKQ         |

|       |              |       |               |       |               |
|-------|--------------|-------|---------------|-------|---------------|
| 1507. | GDQNPPSYLFCG | 1570. | YCAFPPSYVGGP  | 1633. | RRFSPPSYSKLT  |
| 1508. | DISFPPSYPYSE | 1571. | GRGTPPSYGGGG  | 1634. | RRFSPPSYSKLT  |
| 1509. | LLGTPPSYPYWG | 1572. | TRGPPPSYGGSS  | 1635. | DLEGPPSYKPP   |
| 1510. | KNFLPPSYLMMG | 1573. | SDYQPPSYYGMD  | 1636. | MDLGPPSYVPAT  |
| 1511. | STYIPPSYISEM | 1574. | EECDPPSYTAGQ  | 1637. | LLLDPPSYVPDT  |
| 1512. | SSVLPPSYASDR | 1575. | TSYPPPSYNPTC  | 1638. | TAACPPSYDRVT  |
| 1513. | MAAAPPSYCFVA | 1576. | VTGEPSPSYSSGS | 1639. | PNGLPPSYTIIL  |
| 1514. | RAASPPSYTLDL | 1577. | LSGDPPSYLTGE  | 1640. | PEGLPPSYVFFVS |
| 1515. | VRPLPPSYLDER | 1578. | PDSWPPSYGVCM  | 1641. | SLQDPPSYPPVQ  |
| 1516. | QEEGPPSYYDNQ | 1579. | EPSKPPSYDIKF  | 1642. | PTDCPPSYEAVM  |
| 1517. | KVQMPPSYLDTE | 1580. | VDQPPPSYSVLT  | 1643. | YKTPPPSYNSAL  |
| 1518. | RDQMPPSYLLER | 1581. | SHLQPPSYGPVL  | 1644. | RESPPSYTSSM   |
| 1519. | QLRFPPSYRNRT | 1582. | IDKSPPSYITQP  | 1645. | PSHPPSYLFLY   |
| 1520. | RNQFPPSYAGIS | 1583. | WCFPPPSYPSYK  | 1646. | PNSSPPSYEFLW  |
| 1521. | RRAQPPSYMHIF | 1584. | GTMVPPSYSSQP  | 1647. | PNENPPSYYSIF  |
| 1522. | SYCEPPSYRPMH | 1585. | GKQLPPSYGTYP  | 1648. | PVTSPPSYSSEI  |
| 1523. | RCSLPPSYCSKL | 1586. | GIPEPPSYLLFP  | 1649. | PYEAPPSYEQSC  |
| 1524. | LGTTPPSYKVRW | 1587. | GGPHPPSYSLPP  | 1650. | QTGPPPSYRPG   |
| 1525. | KSSGPPSYFIKR | 1588. | GLAHPPSYSNPP  | 1651. | QEQPPPSYKPLF  |
| 1526. | VHRIPPSYVKMI | 1589. | KGMNPPSYYTQP  | 1652. | STSFPPSYDSVT  |
| 1527. | MPDVPPSYSHYY | 1590. | GDMKPPSYDSDE  | 1653. | ATSFPPSYESVT  |
| 1528. | PCLSPPSYTFPA | 1591. | GDMKPPSYDSDS  | 1654. | STTSPPSYDSVT  |
| 1529. | KARHPPSYVVYV | 1592. | GAMKPPSYDSDE  | 1655. | STTPPPSYDSVT  |
| 1530. | ERRNPPSYAMAG | 1593. | SIASPPSYENVR  | 1656. | STPPPPSYEEVT  |
| 1531. | AERFPPSYTSYL | 1594. | ASAVPPSYQDVR  | 1657. | GPLLPPSYLHLS  |
| 1532. | YWQAPPSYLGDR | 1595. | GLLFPPSYVPPV  | 1658. | TKQPPPSYPRED  |
| 1533. | NLIIPPSYLTSI | 1596. | GFIFPPSYVPPV  | 1659. | SYGQPPSYGQQP  |
| 1534. | LSAAPPSYFRGF | 1597. | GFLFPPSYVPPV  | 1660. | PYVAPPSYEGPH  |
| 1535. | QGIEPPSYVAAA | 1598. | GLIFPPSYIPIV  | 1661. | TPGTPPSYSSRT  |
| 1536. | EGTQPPSYVLRA | 1599. | GLIFPPSYIPVV  | 1662. | PVTAPPSYPPTS  |
| 1537. | IKRDPPSYFFGT | 1600. | GFLLPSPSYGAVI | 1663. | PPGTPPSYKLPL  |
| 1538. | RGATPPSYRSSE | 1601. | KVPYPPSYVPAV  | 1664. | RREAPPSYGQLI  |
| 1539. | SAVIPPSYRPTP | 1602. | AQHRPPSYHPSQ  | 1665. | QQQAPPSYGQLI  |
| 1540. | RPLKPPSYSSHQ | 1603. | AMCIPPSYADLG  | 1666. | EVGSPPSYSEAL  |
| 1541. | RALTPPSYSTAK | 1604. | TMCIPPSYADLG  | 1667. | RPEAPPSYAEVV  |
| 1542. | CDLLPPSYSKTQ | 1605. | PMCIPPSYADLG  | 1668. | HPEAPPSYRESI  |
| 1543. | YGYIPPSYNLPD | 1606. | ASCSPPSYAGLG  | 1669. | RPGSPPSYEEAM  |
| 1544. | NLTTPPSYAATI | 1607. | VMSLPSPSYKDKP | 1670. | IPATPPSYESMT  |
| 1545. | GSVQPPSYGVQL | 1608. | LANLPSPSYHNET | 1671. | IPATPPSYESVD  |
| 1546. | KEPRPPSYTISI | 1609. | LAHLPPSYESAV  | 1672. | VPSAPPSYEEAT  |
| 1547. | DCRPPPSYPGSG | 1610. | LFHIPPSYKSTV  | 1673. | APSAPPSYEEETV |
| 1548. | CSSCPPSYQGSC | 1611. | LASLPSPSYQDSL | 1674. | TPEPPPSYDEAV  |
| 1549. | CSECPPSYGGSC | 1612. | EVTQPPSYEDAV  | 1675. | PAWPPPSYESIS  |
| 1550. | CSSCPPSYGGSC | 1613. | TPSTPPSYLQVS  | 1676. | PVEPPPSYQSVI  |
| 1551. | CARHPPSYCGGD | 1614. | PLFSPPSYRVTI  | 1677. | PSAPPSYAKVI   |
| 1552. | GFPKPPSYNVAT | 1615. | PQFQPPSYQATV  | 1678. | LRELPPSYTPPA  |
| 1553. | EGQPPPSYNWTR | 1616. | PSSLPPSYFGNQ  | 1679. | YPSYPPSYPGTW  |
| 1554. | AQATPPSYRCCS | 1617. | RKISPPSYARRD  | 1680. | NRGVPPSYPPPE  |
| 1555. | AEPLPPSYVACS | 1618. | PECYPPSYPSAM  | 1681. | ARSVPPSYPPPQ  |
| 1556. | TQSLPPSYHSCR | 1619. | PNFIPPSYPSGQ  | 1682. | ADSPPPSYPTQQ  |
| 1557. | TFLVPPSYFFDP | 1620. | PEEKPPSYRSLD  | 1683. | MHLQPPSYHRDP  |
| 1558. | CLRYPPSYKALL | 1621. | DQPPPPSYIYGA  | 1684. | IPTQPPSYHKKP  |
| 1559. | MPTLPPSYNTSE | 1622. | ASSPPPSYFLFS  | 1685. | FIPPPPSYNPNP  |
| 1560. | AVHHPPSYVAHL | 1623. | PEVGPPSYAPQV  | 1686. | VYVPPPSYRSP   |
| 1561. | AVHHPPSYVAHL | 1624. | PRTGPPSYAKDD  | 1687. | PQKPPPSYFAIV  |
| 1562. | CCDHPPSYPLHF | 1625. | PRLNPPSYEDDQ  | 1688. | PPSVPPSYPGPS  |
| 1563. | CGTYPPSYNLTF | 1626. | SHPLPPSYRKFL  | 1689. | PSQQPPSYGGPS  |
| 1564. | DFAAPPSYGMDV | 1627. | QKPAPPSYQRWL  | 1690. | VTTTPPSYYPYP  |
| 1565. | FGYRPPSYSTAY | 1628. | PKPAPPSYQRWR  | 1691. | RYGPPPSYPNLK  |
| 1566. | IVSLPPSYQICF | 1629. | QKPAPPSYQRWR  | 1692. | VPPPPSYAGIA   |
| 1567. | AGGRPPSYAGSP | 1630. | PGRPSPSYSRAA  | 1693. | PAPPPPSYGATH  |
| 1568. | ALGDPPSYRFSP | 1631. | RRPGPPSYEAHL  | 1694. | PPVPPPSYFATF  |
| 1569. | ALGDPPSYDKNG | 1632. | RKLSPPSYCKLA  | 1695. | PLTPPPSYGHQP  |

|       |              |       |                     |       |               |
|-------|--------------|-------|---------------------|-------|---------------|
| 1696. | LGPPPPSYTCFR | 1759. | QTFLPPTYSIID        | 1822. | RTQSPPVYTATS  |
| 1697. | LPPPPPSYPSPK | 1760. | QAYCPPTYSTTG        | 1823. | HQQRPPVYRRPG  |
| 1698. | AYPPPPSYSPK  | 1761. | QSYCPPTYSTTG        | 1824. | EAKLPPVYVRKE  |
| 1699. | LAPPPPSYPCGP | 1762. | LCYEPPTYSPAG        | 1825. | TSHEPPVYMDDED |
| 1700. | TPLPPPSYMHAG | 1763. | YHQIPPTYDLHG        | 1826. | LSPEPPVYSLQD  |
| 1701. | PPPAPPSYSDKG | 1764. | CARVPPTYDISG        | 1827. | HEKQPPVYCTSP  |
| 1702. | PPSPPPSYHPPP | 1765. | CARDPPTYSPRA        | 1828. | ARWLPPVYEDGF  |
| 1703. | PPQPPPSYYPPT | 1766. | PMKFPPTYSLAS        | 1829. | NMPYPPVYHQSP  |
| 1704. | PPPPPPSYSTLA | 1767. | PAQLPPTYQLLG        | 1830. | LRPRPPVYDDGP  |
| 1705. | PPPPPPSYMHIP | 1768. | PGAEPPTYECSH        | 1831. | ICPTPPVYEEHE  |
| 1706. | PPPPPPSYDPTY | 1769. | RSPLPPTYLRPF        | 1832. | FVPQPPVYQEGE  |
| 1707. | QPPPPPSYSPAR | 1770. | QPLLPPTYFLEG        | 1833. | NESRPPVYQHVP  |
| 1708. | AMVWPPTYSRNE | 1771. | TPMYPPTYLEPG        | 1834. | QRSRPPVYECVP  |
| 1709. | ASERPPTYCELV | 1772. | NVYHPPTYHDML        | 1835. | LHAGPPVYFVLE  |
| 1710. | DIRLPPTYAAFV | 1773. | RVYQPPTYNRII        | 1836. | SRHWPPVYVMDM  |
| 1711. | LRKNPPTYSSST | 1774. | HSQOPPTYTRVF        | 1837. | RPPQPPVYLFVF  |
| 1712. | EESDPPTYKDAF | 1775. | ALFMPPTYYDAW        | 1838. | LAQAPPVYLDVL  |
| 1713. | ENAFPPTYVLQA | 1776. | HQLLPPTYRDVW        | 1839. | EAQLPPVYPVAS  |
| 1714. | FFIFPPTYLFLK | 1777. | <b>CGLIPPTYRGVV</b> | 1840. | KETLPPVYALEL  |
| 1715. | EISFPPTYRYER | 1778. | CGLIPPTYRGVW        | 1841. | SQSMPPVYPSVD  |
| 1716. | RLLFPPTYKFDR | 1779. | <b>CGLIPPTYRGVR</b> | 1842. | SVSTPPVYPPKN  |
| 1717. | KQOHPPTYVQNV | 1780. | FKHAPPTYEDVI        | 1843. | TFIAPPVYSNIT  |
| 1718. | ALHVPPTYIVEH | 1781. | FKLAPPTYEDVI        | 1844. | TFIAPPVYSDIT  |
| 1719. | AAAVPPTYADLG | 1782. | PPSKPPTYEEQD        | 1845. | YFIKPPVYVTVS  |
| 1720. | AMAVPPTYADLG | 1783. | MEGPPPTYSEVI        | 1846. | PGLEPPVYVPPP  |
| 1721. | VGKIPPTYQIRF | 1784. | MEGPPPTYSEVM        | 1847. | YFKEPPVYHPPS  |
| 1722. | TNQTPPTYNKTN | 1785. | EPPEPPTYRAQG        | 1848. | SHLLPPVYPPAP  |
| 1723. | GGYDPPTYIRDL | 1786. | RASPPPTYSPSM        | 1849. | RNYLPPVYSQRG  |
| 1724. | GGYDPPTYAMDV | 1787. | AAAAPPTYDAVV        | 1850. | STVLPPVYNQON  |
| 1725. | SPWKPPTYLFST | 1788. | PLYAPPTYDAVV        | 1851. | YDNLPPVYFAAA  |
| 1726. | YPWKPPTYLFST | 1789. | PNKAPPTYDTVL        | 1852. | LHSEPPVYANLS  |
| 1727. | SGWQPPTYHSGR | 1790. | PNKAPPTYDAVV        | 1853. | AMSEPPVYCNLV  |
| 1728. | AYWEPPTYIRCV | 1791. | PLYTPPTYGAQQ        | 1854. | LMSEPPVYCNLV  |
| 1729. | SPRLPPTYMHAM | 1792. | PPPPPPTYRTVV        | 1855. | LMSEPPVYCNLA  |
| 1730. | ALNRPPTYPTKY | 1793. | PPPGPPTYDPAL        | 1856. | LPGPPPVYAADS  |
| 1731. | NCDPPPTYEEAT | 1794. | YPPPPPTYNPNF        | 1857. | IRKEPPVYAAGS  |
| 1732. | NCDPPPTYEEAT | 1795. | PGFPPPTYVIIP        | 1858. | GPIVPPVYGLEV  |
| 1733. | KSKPPPTYESEE | 1796. | AGGPPPTYASP         | 1859. | PALPPPVYIISV  |
| 1734. | LIPSPPTYNSAH | 1797. | SPAVPPTYPSGP        | 1860. | LREPPPVYPDLA  |
| 1735. | LIDSPPTYNADY | 1798. | FPTAPPTYPPYP        | 1861. | DEEPPPVYSPPA  |
| 1736. | FSNSPPTYYFDY | 1799. | GKISPPVYLTNE        | 1862. | LAAPPPVYYPAA  |
| 1737. | CYSTPPTYFELP | 1800. | SQLYPPVYVFLS        | 1863. | KAGPPPVYLPSP  |
| 1738. | NKRGPPTYNEHI | 1801. | CFQYPPVYVGKI        | 1864. | LKKPPPVYRPPV  |
| 1739. | ISTEPPTYLREQ | 1802. | LVDIPPVYGLYA        | 1865. | YPAGPPVYNPAA  |
| 1740. | FIRAPPTYVKVE | 1803. | KDCKPPVYLLLE        | 1866. | AAIPPPVYEEQD  |
| 1741. | FHKQPPTYVRAQ | 1804. | APRRPPVYKFI         | 1867. | PPPLPPVYSMET  |
| 1742. | ILAQPPTYEQKQ | 1805. | IAFSPPVYPAGI        | 1868. | PPVPPPVYQEYP  |
| 1743. | NQSYPPTYNVKD | 1806. | YSVPPPVYGCHT        | 1869. | PPPPPPVYEPVS  |
| 1744. | PCLSPPTYTTFQ | 1807. | GEKNPPVYSSRV        | 1870. | PPPPPPVYCVCR  |
| 1745. | PDISPPTYVKEE | 1808. | QLLLPPVYSAVL        | 1871. | GPEPPPVYTNLS  |
| 1746. | AFDAPPTYASTP | 1809. | LSVRPPVYLHDV        | 1872. | LAPAPPVYEAVS  |
| 1747. | KPIKPPTYQVLE | 1810. | NVEAPPVYDSYE        | 1873. | GYQPPPVYAAAA  |
| 1748. | QELKPPTYKLMT | 1811. | QCESPPVYSGYY        | 1874. | VRGPPPVYTNGK  |
| 1749. | RYSDPPTYCLPP | 1812. | GIATPPVYQQLL        | 1875. | YNNWPPVYTFGA  |
| 1750. | PRRGPPTYRADD | 1813. | TPIKPPVYNSRL        | 1876. | YNNWPPVYTFGQ  |
| 1751. | RVKCPPTYPDVV | 1814. | DDSKPPVYGACK        | 1877. | SYSPPPVYTFGQ  |
| 1752. | SYSTPPTYTFGQ | 1815. | VKPLPPVYLTFT        | 1878. | DPARPPWYACSS  |
| 1753. | SFTTPPTYTFGQ | 1816. | DTLVPPVYTVSQ        | 1879. | TAGRPPWYNEHG  |
| 1754. | VPGAPPTYISPL | 1817. | GSSLPPVYWLPS        | 1880. | AQTQPPWYQLPP  |
| 1755. | KFMPPPTYTEAA | 1818. | DTPCPPVYAETK        | 1881. | DPRSPPWYARAW  |
| 1756. | KFMPPPTYTEVD | 1819. | QCVEPPVYETPT        | 1882. | RESEKPPVYSSGP |
| 1757. | NFTAPPTYTETL | 1820. | SYSNPPVYHGNS        | 1883. | DPRSPPWYARAW  |
| 1758. | AFSTPPTYTDKL | 1821. | VVGSPPVYSVTS        | 1884. | AQTQPPWYQLPP  |

|       |               |       |               |
|-------|---------------|-------|---------------|
| 1885. | YSKLPPWYPIPH  | 1948. | SPAGPPYYYYMD  |
| 1886. | HSREPPWYYYMD  | 1949. | GPAAPPYYYYYY  |
| 1887. | IEDVPPWYLCIL  | 1950. | RGRGPPYYYYYG  |
| 1888. | IEDVPPWYLCIF  | 1951. | SSSWPPYYYYYG  |
| 1889. | RRRFPPYMRRP   | 1952. | ARGCPPYYGMDV  |
| 1890. | VVLSPPYYIFCR  | 1953. | SGGYPPYYNGI   |
| 1891. | VTPKPPYYNILL  | 1954. | AAGTPPYYYYGM  |
| 1892. | QDGGPPYYMIET  | 1955. | AAGIPPPYYGMD  |
| 1893. | CQHRPPYYGYVK  | 1956. | QGQWPPYYGNYD  |
| 1894. | MPWDPPYYSGVI  | 1957. | RLFLPPYYDSS   |
| 1895. | HPVNPPYYIPLV  | 1958. | ARDPPPPYYDSS  |
| 1896. | KTFRPPYYHRNC  | 1959. | RGNPPPPYYDIGT |
| 1897. | QDVAPPYYKNNV  | 1960. | RGIPPPYYDFWS  |
| 1898. | GNHVPPYYGNSV  | 1961. | CARHPPYYFDYW  |
| 1899. | AIGFPPYYAHTA  | 1962. | QQLAPPYYFDYW  |
| 1900. | HMDNPPYYRITS  | 1963. | WQGWPPYYFDYW  |
| 1901. | PHSSPPYYEFLW  | 1964. | YCASPPYYDSS   |
| 1902. | VSTAPPYYDYVW  | 1965. | CARVPPYYDSS   |
| 1903. | NSIPPPYYTTSQ  | 1966. | VKPLPPVALTFT  |
| 1904. | INERPPYYLGRD  | 1967. | GFLLPSSAGAVI  |
| 1905. | AQGRPPYYTPNQ  | 1968. | YLPSPGFAPVIGL |
| 1906. | FGGRPPYYSEEM  | 1969. | LPTVKPFLVPTY  |
| 1907. | HHTPPPPYSRPS  |       |               |
| 1908. | YDYEPPYYDVMT  |       |               |
| 1909. | PQRQPPYYSCQC  |       |               |
| 1910. | ITQSPPYYRCVC  |       |               |
| 1911. | DQSQPPYYNVTA  |       |               |
| 1912. | LMYPPPPYYLGIG |       |               |
| 1913. | LKAKPPYYVGLG  |       |               |
| 1914. | LSLQPPYYDLGV  |       |               |
| 1915. | DVALPPYYQPEE  |       |               |
| 1916. | QQPGPPYYTDFG  |       |               |
| 1917. | PRYSPPYYPPFE  |       |               |
| 1918. | VPPQPPYYPSNG  |       |               |
| 1919. | PKPKPPYYPQPE  |       |               |
| 1920. | PPPPPPYYPSFL  |       |               |
| 1921. | PVPPPPYYPPEY  |       |               |
| 1922. | PLPPPPYYPPEY  |       |               |
| 1923. | QPPPPPPYPPED  |       |               |
| 1924. | VPEYPPYYQEEA  |       |               |
| 1925. | AYAPPPPYYCSNI |       |               |
| 1926. | EPASPPYYSEKT  |       |               |
| 1927. | EGSNPPYYTDTT  |       |               |
| 1928. | DGDGPPYYADSV  |       |               |
| 1929. | TPAAPPYYCDIK  |       |               |
| 1930. | LKTLPPYYLLTK  |       |               |
| 1931. | LKTLPPYYLLVC  |       |               |
| 1932. | LKTLPPYYLTKL  |       |               |
| 1933. | LKTMPPYYLGPL  |       |               |
| 1934. | ETCPPPPYYHFQD |       |               |
| 1935. | QEVIPPPYYSYLK |       |               |
| 1936. | QLSSPPYYYGDS  |       |               |
| 1937. | GRAYPPYYYESG  |       |               |
| 1938. | TYGYPPYYLSPI  |       |               |
| 1939. | MDQMPPYYAASH  |       |               |
| 1940. | DGYSPPYYGGLD  |       |               |
| 1941. | SIFGPPYYYYM   |       |               |
| 1942. | REWLPPYYYYMD  |       |               |
| 1943. | GPAEPPYYDAYA  |       |               |
| 1944. | MDQLPPYYYYM   |       |               |
| 1945. | LTGYPPYYYYM   |       |               |
| 1946. | RVSIPPPYYM    |       |               |
| 1947. | ELRLPPYYM     |       |               |
