# Supplementary material
Source: PubMed Central journal article supplement (PMC2885219)
Supplement: supp_M109.084525_jbc.M109.084525-2.pdf [file supp_M109.084525_jbc.M109.084525-2.pdf]

**Tapia et al., Supplementary Figure 2**

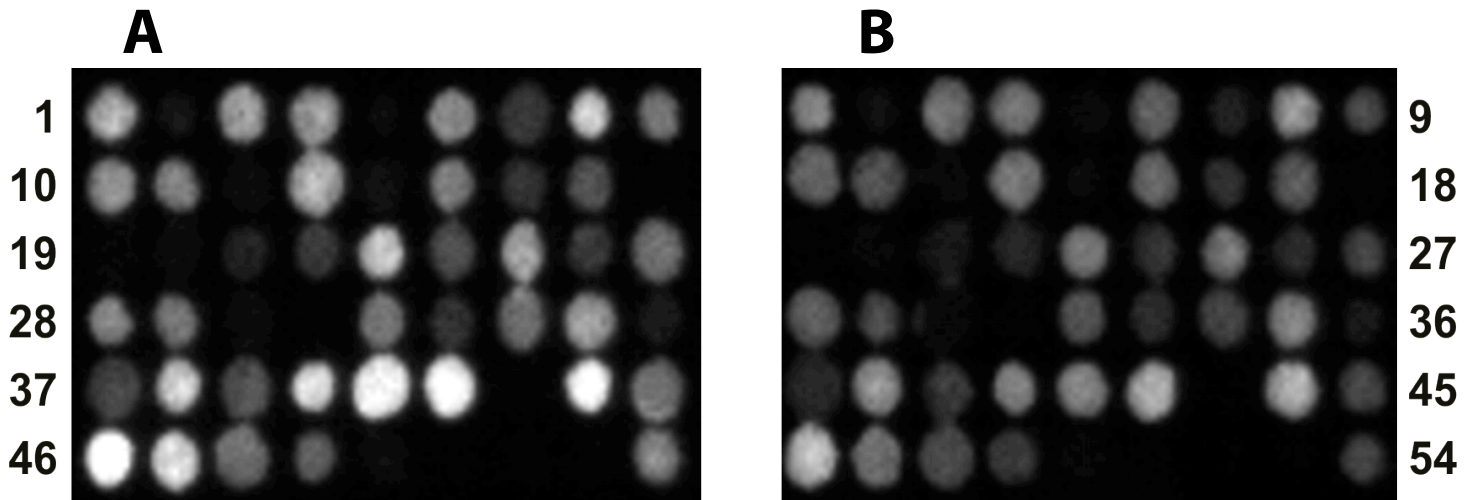

| Pos | ID   | Sequence     | Pos | ID   | Sequence      | Pos | ID   | Sequence      |
|-----|------|--------------|-----|------|---------------|-----|------|---------------|
| 01  | 1160 | PQERPPPYLAVP | 19  | 1169 | DGEEPPPYQGPC  | 37  | 1461 | CATRPPRYSSGW  |
| 02  | 1159 | MAEPPPPYSEVL | 20  | 1134 | TDSSPPPYSSIT  | 38  | 1505 | IYQVPPSYQNQG  |
| 03  | 1091 | SATLPPPYQLIN | 21  | 1818 | DTPCPPVYAETK  | 39  | 1535 | QGIEPPSYVAAA  |
| 04  | 1160 | PQERPPPYLAVP | 22  | 1461 | CATRPPRYSSGW  | 40  | 1639 | PNGLPSPSYTIIL |
| 05  | 1159 | MAEPPPPYSEVL | 23  | 1505 | IYQVPPSYQNQG  | 41  | 1640 | PEGLPPSYVFEVS |
| 06  | 1091 | SATLPPPYQLIN | 24  | 1535 | QGIEPPSYVAAA  | 42  | 0871 | FGRVPPPLYQLCF |
| 07  | 1461 | CATRPPRYSSGW | 25  | 1545 | GSVQPPSYGVQL  | 43  | 1574 | EECDPPSYTAGQ  |
| 08  | 1505 | IYQVPPSYQNQG | 26  | 1577 | LSGDPSPSYLTGE | 44  | 0028 | FMIKLPQYSSLE  |
| 09  | 1535 | QGIEPPSYVAAA | 27  | 0016 | CAPGRPRAQPPA  | 45  | 1854 | LMSEPPVYCNLV  |
| 10  | 0135 | TTVVPPAYSMVT | 28  | 0135 | TTVVPPAYSMVT  | 46  | 1645 | PSHPPPSYLEFLY |
| 11  | 1853 | AMSEPPVYCNLV | 29  | 1853 | AMSEPPVYCNLV  | 47  | 1610 | LFHIPPSYKSTV  |
| 12  | 0245 | KQTNPPDYLTEA | 30  | 0245 | KQTNPPDYLTEA  | 48  | 135  | TTVVPPAYSMVT  |
| 13  | 1160 | PQERPPPYLAVP | 31  | 1036 | QSEAPPNYADV   | 49  | 1853 | AMSEPPVYCNLV  |
| 14  | 1159 | MAEPPPPYSEVL | 32  | 1092 | GSTIPPPYISSQ  | 50  | 0245 | KQTNPPDYLTEA  |
| 15  | 1091 | SATLPPPYQLIN | 33  | 1226 | GPREPPPYQEPR  | 51  | 0000 | DANTPIMDME    |
| 16  | 1001 | ELMFPPNYDQSK | 34  | 1604 | TMCIPPSYADLG  | 52  | 1036 | QSEAPPNYADV   |
| 17  | 1090 | SSTLPPPYLLEA | 35  | 1605 | PMCIPPSYADLG  | 53  | 1036 | QSEAPPNYADV   |
| 18  | 1035 | QPEAPPNYADV  | 36  | 1783 | MEGPPPTYSEVI  | 54  | 1604 | TMCIPPSYADLG  |
