# Supplementary material
Source: PubMed Central journal article supplement (PMC2885219)
Supplement: supp_M109.084525_jbc.M109.084525-3.pdf [file supp_M109.084525_jbc.M109.084525-3.pdf]

Tapia et al., Supplementary Figure 3

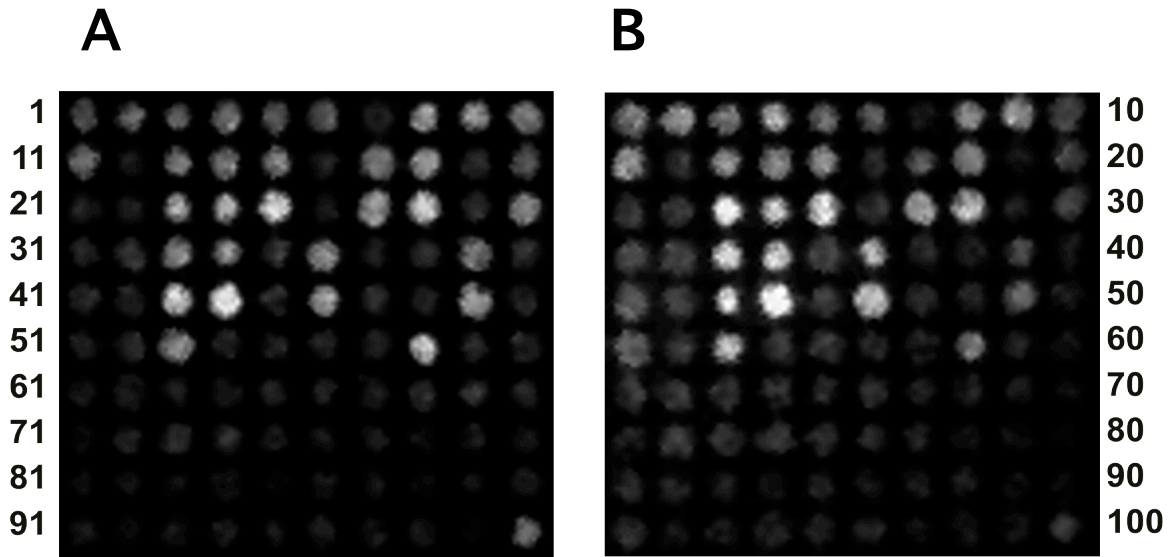

| Pos | SEQUENCE       | Pos | SEQUENCE       | Pos | SEQUENCE       | Pos  | SEQUENCE       |
|-----|----------------|-----|----------------|-----|----------------|------|----------------|
| 1.  | YSPTSPSYSPTSPS | 26. | YsPTsPSYSPTSPs | 51. | YsPTSPsYSPTsPs | 76.  | YSPTSPSySPTSPS |
| 2.  | YsPTSPSYSPTSPS | 27. | YsPTSPsYsPTSPs | 52. | YsPTSPSYsPTsPs | 77.  | YSPTSPSySPTsPS |
| 3.  | YSPTsPSYSPTSPS | 28. | YsPTSPsYSPTsPS | 53. | YSPTsPsYsPTsPS | 78.  | YSPTSPSySPTSPs |
| 4.  | YSPTSPsYSPTSPS | 29. | YsPTSPsYSPTSPs | 54. | YSPTsPsYsPTSPs | 79.  | ySPTSPSySPTSPS |
| 5.  | YSPTSPSYsPTSPS | 30. | YsPTSPSYsPTsPS | 55. | YSPTsPsYSPTsPs | 80.  | ysPTSPSySPTSPS |
| 6.  | YSPTSPSYSPTsPS | 31. | YsPTSPSYsPTSPs | 56. | YSPTsPSYsPTsPs | 81.  | ySPTsPSySPTSPS |
| 7.  | YSPTSPSYSPTSPs | 32. | YsPTSPSYSPTsPs | 57. | YSPTSPsYsPTsPs | 82.  | ySPTSPsySPTSPS |
| 8.  | YsPTsPSYSPTSPS | 33. | YSPTsPsYsPTSPs | 58. | YsPTsPsYsPTsPS | 83.  | ySPTSPSySPTSPS |
| 9.  | YsPTSPsYSPTSPS | 34. | YSPTsPsYSPTsPS | 59. | YsPTsPsYsPTSPs | 84.  | ySPTSPSySPTsPS |
| 10. | YsPTSPSYsPTSPS | 35. | YSPTsPsYSPTSPs | 60. | YsPTsPsYSPTsPs | 85.  | ySPTSPSySPTSPs |
| 11. | YsPTSPSYSPTsPS | 36. | YSPTsPSYsPTsPS | 61. | YsPTsPSYsPTsPs | 86.  | YSptSPSYSPTSPS |
| 12. | YsPTSPSYSPTSPs | 37. | YSPTsPSYsPTSPs | 62. | YsPTSPsYsPTsPs | 87.  | YSPTSPSYSPtSPS |
| 13. | YSPTsPsYSPTSPS | 38. | YSPTsPSYSPTsPS | 63. | YSPTsPsYsPTsPs | 88.  | YSptSPSySPTSPS |
| 14. | YSPTsPSYsPTSPS | 39. | YSPTSPsYsPTsPS | 64. | YsPTsPsYsPTsPs | 89.  | YSptSPsySPTSPS |
| 15. | YSPTsPSYSPTsPS | 40. | YSPTSPsYsPTSPs | 65. | ySPTSPSYSPTSPS | 90.  | YSptSPSySPTSPS |
| 16. | YSPTsPSYSPTSPs | 41. | YSPTSPsYSPTsPs | 66. | ysPTSPSYSPTSPS | 91.  | YSptSPSySPTsPS |
| 17. | YSPTSPsYsPTSPS | 42. | YSPTSPSYsPTsPS | 67. | ySPTsPSYSPTSPS | 92.  | YSptSPSySPTSPs |
| 18. | YSPTSPsYSPTsPS | 43. | YsPTsPsYsPTSPs | 68. | ySPTSPsYSPTSPS | 93.  | YSPTSPSYSPTSPS |
| 19. | YSPTSPsYSPTSPs | 44. | YsPTsPsYSPTsPS | 69. | ySPTSPSYsPTSPS | 94.  | ysPTSPSYSPtSPS |
| 20. | YSPTSPSYsPTsPS | 45. | YsPTsPsYSPTSPs | 70. | ySPTSPSYSPTsPS | 95.  | ySPTsPSYSPtSPS |
| 21. | YSPTSPSYsPTSPs | 46. | YsPTsPSYsPTsPS | 71. | ySPTSPSYSPTSPs | 96.  | ySPTSPsYSPtSPS |
| 22. | YSPTSPSYSPTsPs | 47. | YsPTsPSYsPTSPs | 72. | YSPTSPSySPTSPS | 97.  | ySPTSPSYsPtSPS |
| 23. | YsPTsPsYSPTSPS | 48. | YsPTsPSYSPTsPs | 73. | YsPTSPSySPTSPS | 98.  | ySPTSPSYSPTsPS |
| 24. | YsPTsPSYsPTSPS | 49. | YsPTSPsYsPTsPS | 74. | YSPTsPSySPTSPS | 99.  | ySPTSPSYSPtSPs |
| 25. | YsPTsPSYSPTsPS | 50. | YsPTSPsYsPTSPs | 75. | YSPTSPsySPTSPS | 100. | YSPTSPSYSPTSPS |
