# Supplementary material
Source: PubMed Central journal article supplement (PMC2885219)
Supplement: supp_M109.084525_jbc.M109.084525-8.pdf [file supp_M109.084525_jbc.M109.084525-8.pdf]

| Positiior | Domain | Ligand   | OD  | Sequence        | Name of the protein product                              | Accession #  |
|-----------|--------|----------|-----|-----------------|----------------------------------------------------------|--------------|
| 1         | D00231 | L0001756 | 3.1 | APPRLLPPLPTC*   | Zinc finger protein GLI1(Oncogene GLI)                   | P08151       |
|           |        |          |     | PPPLLRPPLEPTA   | RCOR2 protein                                            | AAH10608     |
|           |        |          |     | RPPLRLPPRPGP    | KIAA0953 protein                                         | BAA76797     |
|           |        |          |     | GAPRLPLPPLLL    | Cholinergic receptor, nicotinic, alpha 4 subunit         | AAH96290     |
|           |        |          |     | RAPPRLLEDQPH    | matrix metalloproteinase 23B                             | CAA20345     |
|           |        |          |     | KTPPPRPPLEPTQ   | ARHGAP8 protein                                          | AAH59382     |
| 7         | D00231 | L0004628 | 3   | PPPPPPLEPFACC   | KIAA0381 protein (Fragment)                              | Q9Y4G0       |
|           |        |          |     | PPPPPPLEPQTS    | FOSB protein                                             | AAH40197     |
|           |        |          |     | PPPPPPLELARD    | NFATC4 protein                                           | AAH08857     |
|           |        |          |     | PPPPPPLEPPPP    | KIAA1598 protein                                         | AAH32303     |
|           |        |          |     | PPPPPPLEPSQA    | Ras association and pleckstrin homology domains          | NP_998754    |
|           |        |          |     | PPPPPPLEPGAI    | forkhead box K1                                          | NP_001032242 |
| 13        | D00231 | L0005659 | 2.6 | SCTRLEPRAQPLP   | hypothetical protein                                     | T08780       |
|           |        |          |     | HRSRLPRAKPPPL   | similar to Transcription initiation factor TFIID         | XP_942107    |
|           |        |          |     | APRLGPRAQPAL    | CACNA2D1 protein                                         | AAH51339     |
|           |        |          |     | CAPGRPRAQPPA    | SCAM-1 protein                                           | AAH67260     |
|           |        |          |     | EPLSPRAQPPG     | SHANK3 protein                                           | AAH62987     |
|           |        |          |     | YALRLRIPPPPL    | HRASLS5 protein                                          | AAH34222     |
| 19        | D00231 | L0005152 | 2.5 | ASLCLPRLYSFRR   | P2X purinoceptor 4 (ATP receptor) (P2X4)                 | P51577       |
|           |        |          |     | ASECNPKYSFRR    | P2X2B receptor                                           | AAH42948     |
|           |        |          |     | FHHCHPKYSFRR    | P2X7 isoform H                                           | AAH82093     |
|           |        |          |     | ASLCLVTLPRFS    | FLJ00353 protein                                         | BAC03416     |
|           |        |          |     | DSLCLPRLQRPMP   | Cadherin 12, type 2, preproprotein                       | AAH47608     |
|           |        |          |     | MSLCLPRLYPSQG   | Leukotriene B4 receptor                                  | AAH04545     |
| 25        | D00231 | L0005552 | 2.5 | FLLLKLPRLYSCKQ  | HERC2 PROTEIN                                            | O88473       |
|           |        |          |     | NLLKLPRLNYSKKS  | ubiquitin protein ligase E3B isoform a                   | NP_569733    |
|           |        |          |     | FLLLKLARHSKFG   | neurotrophic tyrosine kinase, receptor, type 2           | CAH72313     |
|           |        |          |     | FMKLPRLQYSLE    | FLJ30092 protein                                         | AAH21144     |
|           |        |          |     | FLLLKLPRLYIDSKR | dipeptidylpeptidase 10                                   | AAO17263     |
|           |        |          |     | FLLLKLPRLKELSSQ | zinc finger, CCHC domain containing 2                    | NP_060212    |
| 31        | D00231 | L0000884 | 2.4 | WVGLPPLPPLSARC  | Kelch-related protein 1 (Sarcosin)                       | O60662       |
|           |        |          |     | WLGMPPLPSPRC    | sarcosynapsin                                            | AAO06908     |
|           |        |          |     | GWVLPPLPNSDI    | PDCD7 protein                                            | AAH92464     |
|           |        |          |     | LPSLPPLPARCL    | HLA-B associated transcript 1 variant                    | BAD92454     |
|           |        |          |     | PSRGPPLPSARG    | TFPI                                                     | AAK97661     |
|           |        |          |     | WEALPAMPPTARC   | KLHDC8B protein                                          | AAH13110     |
| 37        | D00231 | L0005104 | 2.3 | CGLGLPRLPPLMLL  | cervical cancer proto-oncogene 7                         | AAH46114     |
|           |        |          |     | GELGLPRLPPLPWG  | TCR delta                                                | CAA52179     |
|           |        |          |     | TPDLLPRLPPLMLL  | sphingosine kinase type 2 isoform                        | AAF74124     |
|           |        |          |     | HGLPRLPPLPMLL   | CCDC57 protein                                           | AAH40264     |
|           |        |          |     | WGALPRLPPLMLL   | semaphorin 4B precursor                                  | NP_945119    |
|           |        |          |     | AVLRLPRLPPLMLL  | AarF domain containing kinase 5                          | NP_777582    |
| 43        | D00231 | L0005045 | 2.1 | ILPSPRALFCL     | Voltage-dependent L-type calcium channel alpha-1S        | Q13698       |
|           |        |          |     | SAQRSRALFCL     | calcium channel, voltage-dependent, alpha 1F             | NP_005174    |
|           |        |          |     | SNSRPARALFCL    | calcium channel alpha-1D chain - human                   | JH0564       |
|           |        |          |     | TATRPRALFCL     | jejunum L-type calcium channel alpha 1C                  | AAH70049     |
|           |        |          |     | RREPRPALFCL     | growth differentiation factor 7                          | BAD07014     |
| 48        | D00231 | L0005098 | 2.1 | RLRALPRLFRN     | Platelet glycoprotein V precursor (CD42D)                | P40197       |
|           |        |          |     | PRLRLPRLATGL    | kringle-containing transmembrane protein 2               | BAD97142     |
|           |        |          |     | ELLRALPRLAYTI   | skeletal muscle ryanodine receptor                       | AAC51191     |
|           |        |          |     | WRMLALRALF      | ATP-binding cassette, sub-family F (GCN20)               | NP_060828    |
|           |        |          |     | QLRALRAVFRSQ    | JRK protein                                              | AAH43351     |
|           |        |          |     | ALPTLPRGLFRS    | guanine nucleotide exchange factor GEF-H1                | AAH96658     |
| 54        | D00231 | L0005091 | 2   | AAPCPRLPRLWQLG  | Glycine cleavage system H protein                        | P23434       |
|           |        |          |     | CAPCPRLPRLASV   | latent transforming growth factor-beta-binding protein-2 | AAB37459     |
|           |        |          |     | ASPCPRLPRLRGG   | KIAA1908 protein                                         | BAB67801     |
|           |        |          |     | LPAAPSPRLPRLWF  | alpha-3-galactosylaminyltransferase                      | AAL37342     |
|           |        |          |     | LGLVDPRLPRLWQLF | regulated in COPD kinase transcript variant 3            | AAH81412     |
|           |        |          |     | AAPCPRLPRLTHFV  | leukocyte receptor cluster (LRC) member 9                | NP_945339    |

\* This peptide is shorter than that analyzed by AxCell Biosciences Company.  
D00231 stands for WW domain of POBPI, L000 are codes for peptide ligands used by AxCell Biosciences Company.
