# Supplementary material
Source: PubMed Central journal article supplement (PMC2885219)
Supplement: supp_M109.084525_jbc.M109.084525-9.pdf [file supp_M109.084525_jbc.M109.084525-9.pdf]

| <b>SPOT #</b> | <b>PPxY</b> | <b>Sequence</b> | <b>Accession #</b> | <b>Name of the protein</b>                 |
|---------------|-------------|-----------------|--------------------|--------------------------------------------|
| 71            | PPAY        | LRFGPPAYRRFS    | CAI13944           | peptidase (mitochondrial) alpha            |
| 72            | PPAY        | DKVLPPAYLEAT    | NP_001009554       | microfibrillar-associated protein 3        |
| 73            | PPAY        | LQERPPAYNLEA    | NP_056194          | brain protein I-3                          |
| 74            | PPAY        | LTGTPPAYLINR    | NP_001306          | mitogen-activated protein kinase 14        |
| 75            | PPAY        | KLHIPPAYTEVK    | CAI39549           | novel protein                              |
| 76            | PPAY        | ITQTPPAYINVL    | NP_001001894       | tetratricopeptide repeat domain 3          |
| 77            | PPAY        | KDNIPPAYMNII    | AA14995            | unknown protein                            |
| 78            | PPAY        | IKRDPPAYIEEF    | AAH63797           | SDAD1 protein                              |
| 79            | PPAY        | IRRDPPAYLFGT    | XP_371250          | hypothetical protein                       |
| 80            | PPAY        | YTDAPPAYSELY    | NP_055579          | DAZ associated protein 2                   |
| 81            | PPAY        | RLEGPPAYVFL     | BAC85889           | unnamed protein                            |
| 82            | PPAY        | AGAAPPAYEGDT    | AAQ88849           | galactosyltransferase                      |
| 83            | PPAY        | ICACPPAYAGDS    | AAQ72571           | laminin alpha 3                            |
| 84            | PPAY        | TGYVPPAYLRRL    | AAH26280           | NCK interacting protein                    |
| 85            | PPAY        | AGEDPPAYQARL    | AAH12077           | ISGF3G protein                             |
| 86            | PPAY        | NSRCPPAYTMVG    | BAC56923           | hypothetical protein                       |
| 87            | PPAY        | PVYSPPAYHMHV    | NP_060419          | CUE domain-containing protein              |
| 88            | PPAY        | AHDEPPAYKKNS    | BAD18495           | unnamed protein                            |
| 89            | PPAY        | RISRPPAYLPRS    | NP_001025036       | hypothetical protein                       |
| 90            | PPAY        | RPVFPPAYWTSP    | NP_115814          | I(3)mbt-like 3 isoform a                   |
| 91            | PPAY        | LSEDPAYDHAI     | CAC48254           | similar to testis protein PBS13            |
| 92            | PPAY        | ELVYPPAYGLAQ    | CAI13266           | zinc finger protein 67 homolog             |
| 93            | PPAY        | YRAAPPAYGRGG    | NP_443180          | sorting nexin 26                           |
| 94            | PPAY        | PHTNPPAYEFSW    | AAH10056           | melanoma antigen family F, 1               |
| 95            | PPAY        | GLKRPPAYESLK    | EAL23830           | hypothetical protein                       |
| 96            | PPAY        | GLMRPPAYCDAK    | CAA68286           | unnamed protein                            |
| 97            | PPAY        | LTAPPPAYATLG    | AAH62613           | sodium channel, nonvoltage-gated           |
| 98            | PPAY        | AQKTTPAYRQSQ    | XP_497534          | similar to ribosomal protein S16           |
| 99            | PPAY        | RNQFPPAYGGIS    | CAI12513           | Sec23 homolog B                            |
| 100           | PPAY        | RKDLPPAYGGWQ    | NP_963925          | transglutaminase 5 isoform 1               |
| 101           | PPAY        | HGQIPPAYAGLA    | BAD92691           | multidrug resistance-associated protein 5  |
| 102           | PPAY        | TQQIPPAYKDLA    | Q13233             | mitogen-activated protein kinase MAPKK1    |
| 103           | PPAY        | PDFYPPAYEESL    | NP_694969          | hypothetical protein                       |
| 104           | PPAY        | VLFQPPAYPALG    | AAH35871           | hypothetical protein                       |
| 105           | PPAY        | LQYPPPAYPAAK    | NP_001955          | early growth response 1                    |
| 106           | PPAY        | PASLPPAYALEL    | NP_006178          | 2'-5'oligoadenylate synthetase 3           |
| 107           | PPAY        | KKRYPPAYGPDG    | BAC54560           | cln3e                                      |
| 108           | PPAY        | LAQMPPAYMKSS    | AAN03620           | alpha 1 type XXII collagen                 |
| 109           | PPAY        | LSLLPPAYNKPS    | AAF71042           | PRO1038                                    |
| 110           | PPAY        | RATWPPAYTF      | CAD44743           | Ig kappa light chain variable region       |
| 111           | PPAY        | CVKEPPAYTFRD    | CAH18474           | hypothetical protein                       |
| 112           | PPAY        | CWREPPAYTYRD    | AAH80630           | LEPREL2 protein                            |
| 113           | PPAY        | CWKEPPAYTFRD    | NP_060662          | leprecan-like 1                            |
| 114           | PPAY        | DDCQPPAYTYNN    | AAH25681           | insulin-like growth factor binding protein |
| 115           | PPAY        | DEQEPPAYDQAP    | NP_036321          | calcium-binding p-tyr-regulated protein    |
| 116           | PPAY        | MSSPPAYPGIR     | CAC15496           | URKL1                                      |

| <b>SPOT #</b> | <b>PPxY</b> | <b>Sequence</b> | <b>Accession #</b> | <b>Name of the protein</b>              |
|---------------|-------------|-----------------|--------------------|-----------------------------------------|
| 117           | PPAY        | DDQSPPAYPGSG    | CAI12801           | novel protein                           |
| 118           | PPAY        | DSNGPPAYWGQG    | CAC87193           | Ig heavy chain variable region          |
| 119           | PPAY        | EASFPAYPQQG     | XP_371116          | myosin VB                               |
| 120           | PPAY        | NYSRPPAYSGVP    | CAI40666           | hypothetical protein                    |
| 121           | PPAY        | VQPWPPAYCGCM    | AAM12527           | laminin alpha5 chain precursor          |
| 122           | PPAY        | VAPWPPAYPPVT    | NP_055202          | linker for activation of T cells        |
| 123           | PPAY        | IAATPPAYSTQY    | NP_002964          | ataxin 2                                |
| 124           | PPAY        | VPKSPPAYARSS    | NP_733745          | SH2 domain containing 3C                |
| 125           | PPAY        | VPNAPPAYEKLS    | NP_005502          | melan-A                                 |
| 126           | PPAY        | MNWEPPAYDGGG    | CAH56129           | hypothetical protein                    |
| 127           | PPAY        | VQWEPPAYDGGQ    | Q14896             | MYPC3 Myosin-binding protein C, cardiac |
| 128           | PPAY        | ISWEPPAYTGGC    | CAD12456           | titin                                   |
| 129           | PPAY        | ITWEPPAYANGP    | NP_005206          | deleted in colorectal carcinoma         |
| 130           | PPAY        | QPMGPPAYHETL    | CAH10718           | hypothetical protein                    |
| 131           | PPAY        | DSMAPPAYSLYT    | CAI95656           | novel protein                           |
| 132           | PPAY        | DSTAPPAYSLYT    | AAQ88908           | ERHC3048                                |
| 133           | PPAY        | IYIIPPAYSSVV    | AAH43596           | FANCB protein                           |
| 134           | PPAY        | SYVVPPAYSAVN    | CAI45996           | hypothetical protein                    |
| 135           | PPAY        | TTVVPPAYSMVT    | AAX93139           | unknown protein                         |
| 136           | PPAY        | MTLVPPAYSAVT    | NP_000229          | voltage-gated potassium channel         |
| 137           | PPAY        | CARVPPAYYDFW    | AAS22216           | Ig heavy chain variable region          |
| 138           | PPAY        | RSAEPPAYQQGQ    | AAA60394           | T-cell receptor zeta chain              |
| 139           | PPAY        | GFDPPPAYHEVV    | XP_371254          | ubiquitin specific protease 24          |
| 140           | PPAY        | KVRQPPAYKKG     | CAI13464           | TAL1 (SCL) interrupting locus           |
| 141           | PPAY        | KVRQPPAYKKN     | CAI13468           | TAL1 (SCL) interrupting locus           |
| 142           | PPAY        | MTSPPAYKVGD     | BAB71524           | unnamed protein                         |
| 143           | PPAY        | KMTSPPAYKVGD    | CAG38591           | hypothetical protein                    |
| 144           | PPAY        | SCQLPPAYYDTR    | XP_371586          | hypothetical protein                    |
| 145           | PPAY        | GCLIPPAYEPWR    | CAI40739           | syntaxin binding protein 5 (tomosyn)    |
| 146           | PPAY        | GPPTPPAYPTEE    | NP_872338          | transmembrane protein 61                |
| 147           | PPAY        | AASAPPAYDNVA    | AAH31610           | hypothetical protein                    |
| <b>148</b>    | PPAY        | WIRTPPAYRPPN    | 1QGT               | HUMAN Hepatitis B Viral Capsid          |
| 149           | PPAY        | APSRPPAYQAMG    | BAA32467           | MEGF6                                   |
| 150           | PPAY        | VDFRPPAYSPAQ    | AAH27465           | unknown protein                         |
| 151           | PPAY        | AALPPPAYGFGQ    | AAG33967           | BRG1-associated Factor 250a             |
| 152           | PPAY        | NVLRPPAYSPPR    | NP_003564          | TGF-beta binding protein 4              |
| 153           | PPAY        | ALMHPPAYPPPP    | BAC86582           | unnamed protein                         |
| 154           | PPAY        | DVSKPPAYAYPA    | XP_376567          | KIAA1856 protein                        |
| 155           | PPAY        | PPCFPPAYQDPG    | CAI23187           | dishevelled - homolog 1                 |
| 156           | PPAY        | EPCAPPAYAHPA    | AAM18801           | connexin 31.9                           |
| 157           | PPAY        | EPATPPAYAVPY    | XP_371115          | similar to 60S ribosomal protein L7a    |
| 158           | PPAY        | PGCTPPAYLLDG    | CAD38911           | hypothetical protein                    |
| 159           | PPAY        | GPGIPPAYSSPR    | NP_056485          | SUMO1/sentrin/SMT3 specific protease 3  |
| 160           | PPAY        | LRHSPPAYSGPA    | AAH41460           | aQP12B protein                          |
| 161           | PPAY        | RFKEPPAYGPMC    | AAH25714           | PPP3Ca protein                          |
| 162           | PPAY        | PAPRPPAYNRAL    | CAI18846           | C20orf28                                |

| <b>SPOT #</b> | <b>PPxY</b> | <b>Sequence</b> | <b>Accession #</b> | <b>Name of the protein</b>            |
|---------------|-------------|-----------------|--------------------|---------------------------------------|
| 163           | PPAY        | STFKPPAYEDVV    | AAP97187           | WW-domain binding protein 1           |
| 164           | PPAY        | SGPLPPAYSPRY    | CAI18453           | valyl-tRNA synthetase 2-like          |
| 165           | PPAY        | PAEAPPAYTPQA    | NP_055902          | spartin                               |
| 166           | PPAY        | GHSPPPAYTPMS    | AAAY15092          | unknown                               |
| 167           | PPAY        | STPPPPAYESII    | CAD39158           | hypothetical protein                  |
| 168           | PPAY        | ADTPPPAYMPPD    | CAG33705           | MADH5                                 |
| 169           | PPAY        | ADTPPPAYLPPE    | NP_001003688       | Sma-and Mad-related protein 1         |
| 170           | PPAY        | QFQPPPAYTP      | AAH28575           | unknown protein                       |
| 171           | PPAY        | PFQPPPAYEPPA    | NP_443069          | secretory carrier protein 3           |
| 172           | PPAY        | TREPPPAYEPPA    | CAG46557           | SCAMP3                                |
| 173           | PPAY        | SYLPPPAYSPRF    | BAA82982           | KIAA1030 protein                      |
| 174           | PPAY        | PLTPPPAYDVCF    | BAC11382           | unnamed protein                       |
| 175           | PPAY        | PLPPPPAYDDVA    | BAD18675           | unnamed protein                       |
| 176           | PPAY        | PPGPPPAYAPT     | NP_115688          | Yip1 domain family, member 4          |
| 177           | PPAY        | SGPPPPAYHYRN    | CAI16966           | USP6 N-terminal like                  |
| 178           | PPAY        | PPPPPPAYNYGS    | NP_653333          | E1B-55kDa-associated protein 5        |
| 179           | PPAY        | EPPPPPAYRTGS    | CAH18326           | hypothetical protein                  |
| 180           | PPAY        | EPPPPPAYRTGC    | CAA05080           | TRIP6                                 |
| 181           | PPAY        | PPGPPAYDPYG     | BAA86519           | KIAA1205 protein                      |
| 182           | PPAY        | YGALPPAYGPPA    | BAD92610           | CS0DA006YC23 variant                  |
| 183           | PPAY        | QTLVPPAYAPYP    | CAA65726           | Spi-B transcription factor            |
| 184           | PPAY        | LGLYPPAYGPIP    | XP_374142          | hypothetical protein                  |
| 185           | PPAY        | EFCSPPAYATLT    | AAC98971           | chondromodulin-l                      |
| 186           | PPAY        | CCPRPPAYPSAG    | AAU87043           | CYP2D variant                         |
| 187           | PPAY        | ACPPPPAYCNTP    | CAB66545           | hypothetical protein                  |
| 188           | PPCY        | EKVLPPCYRQEP    | CAC13161           | novel protein                         |
| 189           | PPCY        | EQAQPPCYYGIG    | CAI95315           | novel protein                         |
| 190           | PPCY        | LKRVPCCYLGNS    | XP_373837          | hypothetical protein                  |
| 191           | PPCY        | LRQPPCCYLTAW    | NP_037520          | prolactin regulatory element BP       |
| 192           | PPCY        | SPHLPPCYQHFN    | AAH34225           | KIAA1503 protein                      |
| 193           | PPCY        | SCTSPCCYNFDG    | XP_378280          | hypothetical protein                  |
| 194           | PPCY        | SQSAPPCYPRWW    | NP_938026          | hypothetical protein                  |
| 195           | PPCY        | CNSDPPCYEFLW    | NP_775794          | melanoma antigen family B, 6          |
| 196           | PPCY        | PGQAPPCYAPTY    | NP_872420          | family with sequence similarity 70    |
| 197           | PPCY        | PCNRPPCYVPCT    | AAH62347           | KIAA1404 protein                      |
| 198           | PPCY        | TPEAPPCYMDVI    | CAI22352           | thioredoxin interacting protein       |
| 199           | PPCY        | SMTIPPCYETAS    | CAH18402           | hypothetical protein                  |
| 200           | PPCY        | SLYLPPCYDDAA    | NP_071935          | RNA polymerase I associated factor 53 |
| 201           | PPCY        | PLESPPCYEDAL    | CAD39119           | hypothetical protein                  |
| 202           | PPCY        | DMSKPPCYEEAV    | NP_085044          | proline rich 7 - synaptic             |
| 203           | PPCY        | SLTTPPCYQSVL    | NP_036245          | carbonic anhydrase XIV precursor      |
| 204           | PPCY        | PNECPPCYDTK     | AAG23755           | hypothetical protein                  |
| 205           | PPCY        | AIFCPPCYDVRY    | NP_976227          | enigma protein                        |
| 206           | PPCY        | PNSNPPCYKTMD    | NP_002687          | DNA directed RNA Pol II polypeptide G |
| 207           | PPCY        | PEELPPCYEGTD    | AAH99638           | heparan sulfate 6-O-sulfotransferase  |
| 208           | PPCY        | PYWAPPCYTLKP    | BAD89388           | IL2RG nirs variant 5                  |

| <b>SPOT #</b> | <b>PPxY</b> | <b>Sequence</b> | <b>Accession #</b> | <b>Name of the protein</b>                 |
|---------------|-------------|-----------------|--------------------|--------------------------------------------|
| 209           | PPCY        | ADETPPCYSLSS    | CAA10317           | APC2 protein                               |
| 210           | PPCY        | HSLYPPCYVHDV    | AAH06136           | unknown protein                            |
| 211           | PPCY        | HTGFPPCYVDIA    | XP_498001          | similar to ribosomal protein RS.40K        |
| 212           | PPDY        | DMYAPPDYASTF    | CAI41021           | discs, large homolog 3                     |
| 213           | PPDY        | HRYRPPDYRDLI    | AAB22215           | insulin-like growth factor I receptor      |
| 214           | PPDY        | VDNEPPDYKSLI    | AAH27860           | DOC1 protein                               |
| 215           | PPDY        | AYDSPPDYDLQTV   | CAH71860           | novel transcript                           |
| 216           | PPDY        | WIRNPPDYHQFK    | BAA91837           | unnamed protein                            |
| 217           | PPDY        | DYRNPPDYNFSE    | NP_001012302       | tumor protein p53 inducible protein 5      |
| 218           | PPDY        | LAIPPPDYGAAS    | AAH14020           | Bal1-associated protein 2, isoform 1       |
| 219           | PPDY        | LAIPPPDYGTAS    | BAD96390           | Bal1-associated protein 2 variant          |
| 220           | PPDY        | SEQFPPDYDQQV    | AAH50358           | Tax1 (HTLV type I) binding protein 1       |
| 221           | PPDY        | PIMYPPDYCVF     | CAH72180           | tripeptidyl peptidase II                   |
| 222           | PPDY        | RMTSPPDYRVGD    | NP_036385          | transketolase-like 1                       |
| 223           | PPDY        | ERAQPPDYTFPS    | AAH03167           | phosphatidylinositol 4-kinase type II      |
| 224           | PPDY        | LQSRPPDYESRT    | NP_036441          | SH3 & multiple ankyrin repeat domains 2    |
| 225           | PPDY        | LMESPPDYSAAP    | AAP88034           | pulmonary-associated protein C             |
| 226           | PPDY        | SFAEPPDYSPVT    | CAI40670           | G protein-coupled receptor 64              |
| 227           | PPDY        | SFAEPPDYSPVT    | AAN75702           | HE6 heptahelical receptor variant delta 28 |
| 228           | PPDY        | QYSFPPDYLLCL    | NP_689955          | glypican 2                                 |
| 229           | PPDY        | SSSNPPDYRHEP    | AAF69658           | PRO2849                                    |
| 230           | PPDY        | CCSPPPDYNSVV    | CAI17096           | fms-related tyrosine kinase 1              |
| 231           | PPDY        | CVPGPPDYSCHC    | NP_066548          | TGF beta binding protein 3                 |
| 232           | PPDY        | LSRPPPDYKDQR    | NP_115803          | mastermind-like 2                          |
| 233           | PPDY        | CARGPPDYGDYR    | AAC18156           | Ig heavy chain variable region             |
| 234           | PPDY        | EETIPPDYRLEE    | NP_001741          | calpastatin isoform A                      |
| 235           | PPDY        | ELVHPPDYNPEG    | XP_372262          | similar to ATP-dependent DNA helicase II   |
| 236           | PPDY        | ELVYPPDYNPEG    | CAG30378           | G22P1                                      |
| 237           | PPDY        | DEVTPPDYQPPG    | NP_115508          | HORMA domain protein                       |
| 238           | PPDY        | RVLLPPDYSEDG    | AAH62334           | unknown protein                            |
| 239           | PPDY        | PALGPPDYDEDD    | NP_955631          | nanos homolog 1                            |
| 240           | PPDY        | VDCGPPDYLPSG    | AAG50274           | MBL-associated serine protease 2           |
| 241           | PPDY        | VVIPPPDYLECL    | BAB15671           | unnamed protein                            |
| 242           | PPDY        | IRLLPPDYKIQC    | AAB91447           | CAGL79                                     |
| 243           | PPDY        | VFRCPPDYPIHP    | AAH15169           | unknown protein                            |
| 244           | PPDY        | KKPTPPDYYPEC    | AAH74910           | zinc finger protein 645                    |
| 245           | PPDY        | KQTNPPDYLTEA    | NP_003926          | topoisomerase (DNA) III beta               |
| 246           | PPDY        | QRDSPPDYHLLF    | CAI14998           | novel SH2 domain-containing protein        |
| 247           | PPDY        | RDGGPPDYGMDV    | AAC09096           | IgM heavy chain variable region            |
| 248           | PPDY        | NFELPPDYSSS     | NP_899648          | ring finger protein 14                     |
| 249           | PPDY        | NSVLPPDYDSNP    | CAI12584           | cartilage acidic protein 1                 |
| 250           | PPDY        | TTELPPDYLTSP    | AAF82361           | HGF-regulated TK substrate HRS             |
| 251           | PPDY        | PPRPPPDYLRGG    | AAH33132           | ADAM19 protein                             |
| 252           | PPDY        | DCRDPPDYWTIH    | CAI21598           | unknown protein                            |
| 253           | PPDY        | AAAIPPDYLLDL    | AAH15735           | NADPH dependent oxidoreductase             |
| 254           | PPDY        | NAHIPPDYLLKI    | CAI95405           | novel WD repeat domain protein             |

| <b>SPOT #</b> | <b>PPxY</b> | <b>Sequence</b> | <b>Accession #</b> | <b>Name of the protein</b>            |
|---------------|-------------|-----------------|--------------------|---------------------------------------|
| 255           | PPDY        | PDALPPDYSVVR    | AAQ89081           | metastasis-associated protein         |
| 256           | PPDY        | ADALPPDYSVVR    | NP_001026919       | LY6/PLaUR domain containing 5         |
| 257           | PPDY        | SPAAPPDYMDTR    | AAP34455           | FP18798                               |
| 258           | PPDY        | AGALPPDYVDAS    | AAA60294           | ryanodine receptor                    |
| 259           | PPDY        | AGALPPDYMESN    | CAI15936           | ryanodine receptor 2 (cardiac)        |
| 260           | PPDY        | AGALPPDYLDTR    | NP_001027          | ryanodine receptor 3                  |
| 261           | PPDY        | AGALPPDYLDSR    | BAA23795           | brain ryanodine receptor              |
| 262           | PPDY        | KAAAPPDYSKTR    | NP_835260          | PDZ domain containing 3 isoform a     |
| 263           | PPDY        | TWVRPPDYTTPV    | AAQ04654           | unknown protein                       |
| 264           | PPDY        | RVEEPPDYSLHW    | AAH38451           | similar to RIKEN cDNA 9130427a09      |
| 265           | PPDY        | QASSPPDYTMAW    | CAH70960           | FUSE - far upstream element BP 3      |
| 266           | PPDY        | PARKPPDYINVAL   | Q9Y4G8             | RPGF2 - Rap guanine exchange factor 2 |
| 267           | PPDY        | PEMSPPDYSMAL    | AAI01407           | unknown protein                       |
| 268           | PPDY        | THLKPPDYSVAV    | NP_057424          | GEF-1                                 |
| 269           | PPDY        | LPGGPPDYNTAL    | AAH68545           | Exostosin 2                           |
| 270           | PPDY        | TPIKPPDYNSRL    | AAF00199           | Oct-11/POU transcription factor       |
| 271           | PPDY        | GLACPPDYSLVV    | AAP37488           | connexin47                            |
| 272           | PPDY        | RLTCPPDYTLTL    | NP_851849          | X-linked neuroligin 4                 |
| 273           | PPDY        | RPACPPDYTLAL    | NP_065846          | neuroligin 2                          |
| 274           | PPDY        | RTACPPDYTLAM    | NP_055747          | neuroligin 1                          |
| 275           | PPDY        | EIGNPPDYRGQS    | AAB27085           | adipocyte acid phosphatase alpha      |
| 276           | PPDY        | GYGYPPDYGYE     | CAI20446           | unknown protein                       |
| 277           | PPDY        | SGDLPPDYW       | CAB87480           | unknown protein                       |
| 278           | PPDY        | FTVIPPPDYWGQG   | AAB53760           | IgG variable region heavy chain       |
| 279           | PPDY        | RISCPPDYWGQG    | AAA52856           | IgH                                   |
| 280           | PPDY        | YGCEPPDYWGQ     | AAK13969           | Ig heavy chain variable region        |
| 281           | PPDY        | GQQLPPDYWGRG    | AAS85890           | Ig heavy chain                        |
| 282           | PPDY        | GVLPPPDIWGQG    | AAQ87987           | Ig E heavy chain variable region      |
| 283           | PPDY        | GSGAPPDIWGQG    | AAF75635           | Ig heavy chain variable region        |
| 284           | PPDY        | AAMRPPDIWGQG    | AAD30771           | Ig heavy chain variable region        |
| 285           | PPDY        | QGKQPPDIWGQG    | AAK57773           | Ig heavy chain variable region        |
| 286           | PPDY        | DGSYPPDIWGQG    | CAB44142           | Ig mu heavy chain variable region     |
| 287           | PPDY        | SSWYPPDIWGQG    | CAC28905           | Ig gamma heavy chain variable region  |
| 288           | PPDY        | QLWIPPPDIWGQG   | AAB36574           | V-region, partial cds                 |
| 289           | PPDY        | KSNLPPDIHISL    | BAC80204           | melastatin 1 splicing variant         |
| 290           | PPDY        | KGNLPPDIYRISL   | NP_996830          | transient receptor cation channel     |
| 291           | PPDY        | MPLYPPDYLIDP    | NP_542192          | hypothetical protein                  |
| 292           | PPDY        | MPTFPPDIYGFPE   | NP_004137          | NADH dehydrogenase (ubiquinone)       |
| 293           | PPDY        | LPPLPPDIYGDGY   | BAD92981           | adipocyte enhancer binding protein 1  |
| 294           | PPDY        | PSPVPPDIYEDEF   | AAH74796           | Orexin receptor 1                     |
| 295           | PPDY        | ECSSPPDYLSP     | AAK58174           | SKIP1                                 |
| 296           | PPDY        | PLLPPPDIYPTM    | NP_940966          | hypothetical protein                  |
| 297           | PPDY        | TCICPPDIYMQVN   | NP_000129          | fibrillin 1                           |
| 298           | PPDY        | LSKLPPDIYIPHE   | NP_001362          | dynein, axonemal, heavy polypeptide 8 |
| 299           | PPDY        | LEKLPPDIYVPFE   | NP_001360          | dynein, axonemal, heavy polypeptide 5 |
| 300           | PPDY        | MEKMPPDIYISHF   | AAH72447           | INPP4B protein                        |

| <b>SPOT #</b> | <b>PPxY</b> | <b>Sequence</b> | <b>Accession #</b> | <b>Name of the protein</b>            |
|---------------|-------------|-----------------|--------------------|---------------------------------------|
| 301           | PPDY        | YTQPPPDYLPSE    | NP_005260          | glioma-associated oncogene homolog 1  |
| 302           | PPDY        | LSPTPPDYTRHQ    | AAH35583           | KIAA0999 protein                      |
| 303           | PPDY        | AASCPPDYVPPE    | AAH37948           | DPP9 protein                          |
| 304           | PPDY        | FSQCPPDYHHIH    | BAD18759           | unnamed protein                       |
| 305           | PPDY        | APPPPPDYHHHH    | NP_115803          | mastermind-like 2                     |
| 306           | PPDY        | KSEVPPDYDKHN    | AAH69224           | C10orf9 protein                       |
| 307           | PPDY        | KCEVPPDYDKHN    | AAL07802           | cyclin-box carrying protein           |
| 308           | PPDY        | KKFVPPDYKIHR    | NP_055575          | TatD DNase domain containing 2        |
| 309           | PPDY        | KFFFPPDYQVLK    | BAC85988           | unnamed protein                       |
| 310           | PPDY        | MVSPPPDYPGEF    | NP_060653          | sno, strawberry notch homolog 1       |
| 311           | PPDY        | QTQGPPDYPRFV    | NP_004918          | mitochondrial ribosomal protein L49   |
| 312           | PPDY        | VPDNPDDYQKYY    | NP_001001438       | lanosterol synthase                   |
| 313           | PPDY        | QAENPPDYSEYL    | NP_996806          | YY2 transcription factor              |
| 314           | PPDY        | GENSPPDYSEYM    | NP_003394          | YY1 transcription factor              |
| 315           | PPDY        | REMVPPDYYSY     | AAR02509           | Ig heavy chain variable region        |
| 316           | PPDY        | VASRPPDYYYGM    | AAQ05458           | Ig heavy chain variable region        |
| 317           | PPEY        | AKVDPPEYMLEL    | NP_055297          | bone morphogenetic protein 10         |
| 318           | PPEY        | LHFFPPEYGEVA    | AAF19238           | unknown protein                       |
| 319           | PPEY        | NHLLPPEYTRTL    | NP_777582          | aarF domain containing kinase 5       |
| 320           | PPEY        | KHRQPPEYNPND    | NP_005924          | myeloid/lymphoid leukemia (trithorax) |
| 321           | PPEY        | DRKLPPEYNLPH    | CAB66541           | hypothetical protein                  |
| 322           | PPEY        | GARIPPEYTVSH    | NP_570720          | copine IV                             |
| 323           | PPEY        | YEVAPPEYHRKA    | NP_006782          | MORF-related gene 15 protein          |
| 324           | PPEY        | TCICPPEYMQVN    | NP_001990          | fibrillin 2 precursor                 |
| 325           | PPEY        | TCLCPPEYTGEL    | NP_004778          | slit homolog 2                        |
| 326           | PPEY        | YCEGPPEYKKRK    | BAD92645           | leucine-rich, glioma inactivated 1    |
| 327           | PPEY        | LCIGPPEYQEKK    | BAC86435           | unnamed protein                       |
| 328           | PPEY        | FCSCPPEYFLHD    | CAH18324           | hypothetical protein                  |
| 329           | PPEY        | FCAMPPEYKGHQ    | BAB14500           | unnamed protein                       |
| 330           | PPEY        | PMLCPPEYMVCF    | NP_071347          | ring finger protein 123               |
| 331           | PPEY        | LLRLPPEYEKEL    | AAQ88869           | SLC30a5                               |
| 332           | PPEY        | ILRLPPEYASTV    | NP_005633          | TATA box-BP-associated factor 2F      |
| 333           | PPEY        | TLILPPEYSSWG    | BAD92760           | arrestin domain containing 1 variant  |
| 334           | PPEY        | LLPQPPEYGSTG    | BAC85595           | unnamed protein                       |
| 335           | PPEY        | SKNLPPEYDTHG    | NP_689816          | unknown protein                       |
| 336           | PPEY        | LTWEPPEYDGGG    | CAD12455           | N2B-titin Isoform                     |
| 337           | PPEY        | VVWNPPEYDGGK    | CAD12455           | N2B-titin Isoform                     |
| 338           | PPEY        | ISWNPPEYDGGC    | CAD12455           | N2B-titin Isoform                     |
| 339           | PPEY        | ARQNPPEYSGAY    | AAS86023           | Ig heavy chain                        |
| 340           | PPEY        | DDTIPPEYRHL     | NP_001741          | calpastatin isoform a                 |
| 341           | PPEY        | TTELPPEYLTSP    | NP_004703          | HGF-regulated TK substrate            |
| 342           | PPEY        | PGCHPPEYGQP     | AAL23950           | transcription factor FOXN4            |
| 343           | PPEY        | KGCKPPEYRNYQ    | AAH50537           | unknown protein                       |
| 344           | PPEY        | IDCTPPEYILPG    | CAH10532           | hypothetical protein                  |
| 345           | PPEY        | HLDPPPEYEDIV    | AAH30786           | PRRG1 protein                         |
| 346           | PPEY        | NNWAPPEYYLYS    | AAH28588           | hypothetical protein                  |

| <b>SPOT #</b> | <b>PPxY</b> | <b>Sequence</b> | <b>Accession #</b> | <b>Name of the protein</b>                |
|---------------|-------------|-----------------|--------------------|-------------------------------------------|
| 347           | PPEY        | ALGGPPEYLGQR    | BAD93073           | gene-rich cluster, A isoform              |
| 348           | PPEY        | YANPPPEYWGQG    | AAA18811           | Ig heavy chain subgroup VIII V-D-J region |
| 349           | PPEY        | GALQPPEYPWMK    | NP_006726          | homeobox A2 protein                       |
| 350           | PPEY        | VSHPPEYVWLR     | CAA58706           | HLA-B27 variant exon 3 (alpha2 domain)    |
| 351           | PPEY        | GVSHPPEYVWLR    | CAA74916           | MHC class I antigen                       |
| 352           | PPEY        | VPDVPPEYYSCR    | NP_001001891       | transmembrane protein                     |
| 353           | PPEY        | IPGLPPEYLQVH    | NP_076915          | methionine synthase reductase             |
| 354           | PPEY        | SHDHPPEYSADF    | NP_859531          | origin recognition complex subunit 5      |
| 355           | PPEY        | RPEAPPEYSEVV    | NP_056498          | arrestin domain containing protein        |
| 356           | PPEY        | RPDAPPEYNSHF    | AAH28354           | phospholipid scramblase 4                 |
| 357           | PPEY        | RPDAPPEYSSHf    | NP_065086          | phospholipid scramblase 4                 |
| 358           | PPEY        | RPTDPPEYNYLY    | NP_036475          | nicotinamide nucleotide transhydrogenase  |
| 359           | PPEY        | SPTTPPEYKALF    | AAB20813           | autoantigen of anti-neuronal antibody     |
| 360           | PPEY        | DAQVPPEYVWAP    | Q8WWX9             | selenoprotein M (Protein SelM)            |
| 361           | PPEY        | VNPPPPEYINTK    | AAH17582           | BRDT protein                              |
| 362           | PPEY        | SASLPPEYQNRT    | NP_004523          | mucin 4 isoform d                         |
| 363           | PPEY        | PASLPPEYQNRT    | CAB85604           | sv8-MUC4 apomucin                         |
| 364           | PPEY        | PHTNPPEYEFSW    | NP_071432          | melanoma antigen family F, 1              |
| 365           | PPEY        | PNSRPPEYEFFW    | NP_808225          | trophinin isoform 4                       |
| 366           | PPEY        | PNSNPPEYEFFW    | CAI42346           | melanoma antigen family D, 2              |
| 367           | PPEY        | PNSNPPEYEFLW    | AAG38604           | MAGE-D4                                   |
| 368           | PPEY        | PYVEPPEYEFFW    | NP_002478          | necdin                                    |
| 369           | PPEY        | PDTRPPEYVEEY    | AAH56246           | GALNT3 protein                            |
| 370           | PPEY        | RIVLPPEYPMKP    | AAH13973           | ubiquitin-conjugating enzyme E2           |
| 371           | PPEY        | RISFPPEYPFKP    | NP_004214          | ubiquitin-conjugating enzyme E2L          |
| 372           | PPEY        | RTNWPPEYTF      | AAQ21979           | Ig kappa chain variable region            |
| 373           | PPEY        | YNNWPPEYTFG     | AAM46530           | Ig kappa chain variable region            |
| 374           | PPEY        | SFSNPPEYTFGQ    | S46370             | Ig kappa chain V-J region (T23-9)         |
| 375           | PPEY        | APLPPPEYPNQS    | AAH12740           | Dystroglycan 1                            |
| 376           | PPEY        | SYLPPPEYGPGM    | AAV39834           | Ig mu heavy chain                         |
| 377           | PPEY        | AQDPPPEYDSPE    | AAH17792           | unknown protein                           |
| 378           | PPEY        | PSSPPPEYVCNC    | CAC22313           | EGF-like-domain, multiple 5               |
| 379           | PPEY        | PPYYPPEYTCSS    | CAI95093           | chromosome 1 open reading frame 2         |
| 380           | PPEY        | PPYYPPEYTCTP    | O60320             | KIAA0574 protein                          |
| 381           | PPEY        | SYNPPPEYLLSE    | AAH73813           | BOP1 protein                              |
| 382           | PPEY        | KFQPPPEYQLTA    | CAI16110           | unknown protein                           |
| 383           | PPEY        | RYQPPPEYGVTS    | BAB84910           | unknown protein                           |
| 384           | PPEY        | RYQHPPEYGAAR    | AAV24451           | angiomin p130 isoform                     |
| 385           | PPEY        | PLQPPPEYGGVS    | XP_379582          | hypothetical protein                      |
| 386           | PPEY        | PRGPPPEYPFKT    | BAB84910           | unknown protein                           |
| 387           | PPEY        | HRGPPPEYPFKG    | AAV24451           | angiomin p130                             |
| 388           | PPEY        | PPVLPPEYIPPS    | AAH58925           | ITSN1 protein                             |
| 389           | PPEY        | PPPPPPEYGPHA    | AAH69184           | HNRPL protein                             |
| 390           | PPEY        | PNKPPPEYGPGR    | NP_005392          | protein tyrosine phosphatase 14           |
| 391           | PPEY        | SAPQPPEYGPGR    | BAB47412           | BAB47412                                  |
| 392           | PPEY        | DLPPPPEYELAP    | AAV40942           | unknown protein                           |

| <b>SPOT #</b> | <b>PPxY</b> | <b>Sequence</b> | <b>Accession #</b> | <b>Name of the protein</b>                |
|---------------|-------------|-----------------|--------------------|-------------------------------------------|
| 393           | PPEY        | DGPPPEYPPPP     | BAA20797           | KIAA0339 protein                          |
| 394           | PPFY        | VKENPPFYGVIR    | AAH12342           | CYLD protein                              |
| 395           | PPFY        | EHIQPPFYSFLV    | AAQ88583           | VCEW9374                                  |
| 396           | PPFY        | EDYKPPFYDVVP    | AAY15094           | unknown protein                           |
| 397           | PPFY        | EDYRPPFYDVVP    | NP_000011          | activin A receptor type II                |
| 398           | PPFY        | DKAEPFFYVGSN    | CAB09392           | RNA editing deaminase 1                   |
| 399           | PPFY        | DKSEPPFYVGSN    | AAB18134           | RNA adenosine deaminase                   |
| 400           | PPFY        | TSVSPFFYLRWI    | CAI22243           | novel protein                             |
| 401           | PPFY        | SFPPPPFFYLNCD   | BAC05076           | unnamed protein                           |
| 402           | PPFY        | STEHPFFYNIH     | AAQ13590           | MSTP070                                   |
| 403           | PPFY        | SPTPPFFYGLG     | CAF31291           | Ig heavy chain variable region            |
| 404           | PPFY        | NGYPPFFYYMD     | AAY26938           | aF3 Ig epsilon heavy chain                |
| 405           | PPFY        | KKCFPPFYPSPT    | BAC03635           | unnamed protein                           |
| 406           | PPFY        | PQCSPFFYVSYS    | AAH10019           | MED8 protein                              |
| 407           | PPFY        | CTLEPPFYIVTE    | CAI13566           | v-abl oncogene homolog 2                  |
| 408           | PPFY        | CTREPPFYIITE    | BAD92879           | proto-oncogene aBL 1                      |
| 409           | PPFY        | EEEEPPFYHHPF    | NP_115571          | SON DNA-binding protein isoform B         |
| 410           | PPFY        | YRKGPPFYHASY    | NP_079541          | tRNA splicing endonuclease 2              |
| 411           | PPFY        | MQLSPFFYLQEG    | XP_071013          | similar to testicular serine protease     |
| 412           | PPFY        | WIIAPPFYTPNY    | CAI41226           | bone morphogenetic protein 15             |
| 413           | PPFY        | MDPPFYLPTL      | AAK95848           | Nedd-8                                    |
| 414           | PPFY        | KHPGPPFYVPHA    | NP_000358          | thiopurine S-methyltransferase            |
| 415           | PPFY        | EVEPPFFYVPEV    | BAA82982           | KIAA1030 protein                          |
| 416           | PPFY        | ILYRPPFYSKTE    | AAQ88587           | unknown protein                           |
| 417           | PPFY        | TLYSPFFYSSKG    | AAU05377           | hydrolase beta subunit                    |
| 418           | PPFY        | LIYDPPFYTAER    | BAA95563           | putative Ca <sup>2+</sup> channel protein |
| 419           | PPFY        | AAAEPFFYKDVW    | NP_003595          | insulin receptor substrate 4              |
| 420           | PPFY        | VNDVPPFYFQHL    | AAH35761           | Sec 24-related protein D                  |
| 421           | PPFY        | HCDNPPFYRFTA    | CAI40478           | chromosome 13 open reading frame 14       |
| 422           | PPFY        | VIPCFFYESDH     | NP_005076          | nucleoporin 214kDa                        |
| 423           | PPFY        | VQVPPFYRSL      | CAI45950           | hypothetical protein                      |
| 424           | PPFY        | VTVTPFFYHMDV    | AAR32514           | Ig heavy chain variable region            |
| 425           | PPFY        | LPARPPFYAPAH    | BAA76860           | KIAA1016 protein                          |
| 426           | PPFY        | ATLSPFFYSTNM    | NP_001026911       | NIMA                                      |
| 427           | PPFY        | SPPFPPFYSTKP    | AAK08114           | FKSG70                                    |
| 428           | PPFY        | PPPFPFFYSTKP    | AAK01737           | FKSG59                                    |
| 429           | PPFY        | SPPFPPFYSTKL    | XP_497060          | similar to FKSG60                         |
| 430           | PPFY        | EPPQPPFYKSRT    | XP_209505          | similar to KIAA0445                       |
| 431           | PPFY        | AVGTPFFYATSI    | NP_056505          | serine/threonine kinase 36                |
| 432           | PPFY        | AVGFPPFYADQP    | NP_002723          | protein kinase, cAMP-dependent            |
| 433           | PPFY        | ATGKPPFYELGE    | BAD92330           | MAPKKK5                                   |
| 434           | PPFY        | FASVPPFYQLCF    | CAA46778           | cytochrome P-450 II C                     |
| 435           | PPFY        | LLSTPPFYSACC    | NP_001004329       | developing brain homeobox 2               |
| 436           | PPFY        | LSDSPFFYKPSF    | AAH43371           | regulator of CDKN1a, translocated in CML  |
| 437           | PPFY        | YLGNPPFYEEVE    | CAB66632           | hypothetical protein                      |
| 438           | PPFY        | LSGNPPFYEEVE    | NP_076951          | CAM kinase-like vesicle-associated        |

| <b>SPOT #</b> | <b>PPxY</b> | <b>Sequence</b> | <b>Accession #</b> | <b>Name of the protein</b>               |
|---------------|-------------|-----------------|--------------------|------------------------------------------|
| 439           | PPFY        | LCGYPPFYEEETE   | NP_065172          | calmodulin-dependent protein kinase IG   |
| 440           | PPFY        | LCGYPPFYDEND    | BAD92632           | calmodulin-dependent protein kinase I    |
| 441           | PPFY        | LCGYPPFYDESD    | AAH64422           | PNCK protein                             |
| 442           | PPFY        | LCGYPPFYSKHH    | NP_003659          | Mapk-activated protein kinase 5          |
| 443           | PPFY        | LCGYPPFYSNHG    | CAA53094           | Mapk-activated protein kinase 2          |
| 444           | PPFY        | LCGFPPFYSNTG    | NP_004626          | Mapk-activated protein kinase 3          |
| 445           | PPFY        | LFDTPPFYSNST    | CAH73438           | tyrosinase-related protein 1             |
| 446           | PPFY        | LHGLPPFYSQDV    | CAI42315           | SGK2                                     |
| 447           | PPFY        | LYGLPPFYSRNT    | CAI19718           | SGK                                      |
| 448           | PPFY        | GTPEPPFYCRDV    | NP_733827          | glucocorticoid regulated kinase 3        |
| 449           | PPGY        | AWVQPPGYIRIV    | AAAY24321          | unknown                                  |
| 450           | PPGY        | VQIDPPGYHGGE    | BAA25794           | loricrin                                 |
| 451           | PPGY        | ATARPPGYEFEL    | CAB45750           | hypothetical protein                     |
| 452           | PPGY        | DLTVPPGYCTDF    | BAD96852           | FAS-activated serine/threonine kinase    |
| 453           | PPGY        | LTEAPPGYDSVH    | CAI12394           | ADP-ribosyltransferase                   |
| 454           | PPGY        | GGLKPPGYVVQR    | NP_056197          | HECT domain containing 1                 |
| 455           | PPGY        | AGIQPPGYLIHE    | NP_620148          | calcium activated nucleotidase 1         |
| 456           | PPGY        | QGGHPPGYTSLA    | AAX93166           | unknown protein                          |
| 457           | PPGY        | TLTAPPGYRLRL    | NP_006601          | mannan-binding lectin serine protease 2  |
| 458           | PPGY        | DLSAPPGYTLTE    | BAA34522           | KIAA0802 protein                         |
| 459           | PPGY        | SNMQPPGYQSRH    | XP_093087          | similar to transcription factor (p38 BP) |
| 460           | PPGY        | TAAVPPGYVAMG    | O75553             | DAB1 disabled homolog 1                  |
| 461           | PPGY        | MILSPPGYWERY    | BAC05794           | seven transmembrane helix receptor       |
| 462           | PPGY        | SVSEPPGYQAHS    | AAH53588           | hypothetical protein                     |
| 463           | PPGY        | AALGPPGYLHSA    | BAD18497           | unnamed protein                          |
| 464           | PPGY        | MQRSPPGYGAQD    | NP_060889          | SRY-box 18                               |
| 465           | PPGY        | QKYDPPGYLYQG    | AAC34901           | CDO                                      |
| 466           | PPGY        | VVALPPGYLYLS    | NP_056236          | hypothetical protein                     |
| 467           | PPGY        | MQAQPPGYRHVA    | NP_001601          | lysosomal acid phosphatase 2             |
| 468           | PPGY        | MGLSPPGYNAWI    | CAH18464           | hypothetical protein                     |
| 469           | PPGY        | LGVTPPGYSAWI    | NP_001010898       | solute carrier family 6                  |
| 470           | PPGY        | LDLVPPGYVQLE    | CAI40841           | cadherin related 23                      |
| 471           | PPGY        | LNLAPPGYFLLL    | AAH12791           | C21orf5 protein                          |
| 472           | PPGY        | EKHGPPGYLGGS    | XP_499082          | hypothetical protein                     |
| 473           | PPGY        | TPSAPPGYNIIV    | NP_005488          | connexin 45                              |
| 474           | PPGY        | SESAPPGYVIAL    | Q8TAB3             | protocadherin 19                         |
| 475           | PPGY        | SPMSPPGYKLVT    | BAD97009           | connexin 43 variant                      |
| 476           | PPGY        | KVSPPGYAAQK     | DAA00057           | TPA: adenylyl cyclase type V             |
| 477           | PPGY        | QLWSPPGYYYGM    | CAD44707           | Ig heavy chain variable region           |
| 478           | PPGY        | VVVAPPGYVVVQ    | XP_496849          | hypothetical protein                     |
| 479           | PPGY        | CAVPPPGYALNF    | AAN12373           | T-cell receptor alpha chain              |
| 480           | PPGY        | EKDYPGGYAFDV    | CAH56338           | hypothetical protein                     |
| 481           | PPGY        | SNDMPPGYNHKS    | BAC87553           | unnamed protein                          |
| 482           | PPGY        | TREQPPGYAIDT    | NP_620124          | ras homolog gene family, member T2       |
| 483           | PPGY        | SRDQPPGYKKN     | AAL83560           | maltase-glucoamylase                     |
| 484           | PPGY        | TRDQPPGYKLNS    | NP_001032          | alpha-glucosidase                        |

| <b>SPOT #</b> | <b>PPxY</b> | <b>Sequence</b> | <b>Accession #</b> | <b>Name of the protein</b>             |
|---------------|-------------|-----------------|--------------------|----------------------------------------|
| 485           | PPGY        | QVLVPPGYGQDV    | AAH14178           | CAD protein                            |
| 486           | PPGY        | ITDLPPGYLRPM    | BAA95971           | KIAA1447 protein                       |
| 487           | PPGY        | QGNLPPGYKITL    | AAK44211           | LTRPC7                                 |
| 488           | PPGY        | WAVGPPGYLLQR    | NP_055659          | hypothetical protein                   |
| 489           | PPGY        | RERPPPGYSYGV    | AAV40019           | Ig mu heavy chain                      |
| 490           | PPGY        | ITAVPPGYLTCY    | NP_001005210       | hypothetical protein                   |
| 491           | PPGY        | EVCPPPGYGLDG    | Q9Y6X2             | PIAS3 inhibitor of STAT3               |
| 492           | PPGY        | PAKNPPGYLEDS    | CAH73584           | nuclear factor I/B                     |
| 493           | PPGY        | QGFEPGGYERTE    | AAG22573           | myogenin                               |
| 494           | PPGY        | SGLRPPGYSRLP    | CAI40565           | KIAA0774 protein                       |
| 495           | PPGY        | MVQAPPGYTLVG    | NP_002684          | polymerase (DNA directed), gamma       |
| 496           | PPGY        | PLVQPPGYQDVS    | NP_061925          | StAR-binding protein                   |
| 497           | PPGY        | IGVVPPGYRSSA    | CAI39605           | regulating synaptic exocytosis 1       |
| 498           | PPGY        | VNWLPPGYVVNQ    | NP_803187          | dicer 1                                |
| 499           | PPGY        | SSFFPPGYQVSF    | NP_000560          | Fc fragment, receptor for CD16         |
| 500           | PPGY        | NTFLPPGYKIEV    | NP_056292          | transcriptional co-repressor Sin3a     |
| 501           | PPGY        | GKREPPGYRRKL    | XP_379625          | similar to ubiquitin-ribosomal protein |
| 502           | PPGY        | RRLEPPGYGDWQ    | CAI41021           | discs, large homolog 3                 |
| 503           | PPGY        | RKDLPPGYNGWQ    | NP_443187          | transglutaminase 7                     |
| 504           | PPGY        | RKDLPPGYGGWQ    | AAF23981           | transglutaminase X                     |
| 505           | PPGY        | TVIEPPGYSDGW    | XP_378362          | hypothetical protein                   |
| 506           | PPGY        | CAKRPPGYSSSW    | AAM75832           | Ig heavy chain variable region         |
| 507           | PPGY        | CAREPPGYCSSA    | BAC01991           | Ig heavy chain VHDJ region             |
| 508           | PPGY        | CARAPPGYCSST    | BAC01961           | Ig heavy chain VHDJ region             |
| 509           | PPGY        | HSTSPPGYTILD    | CAI16682           | merosin, congenital muscular dystrophy |
| 510           | PPGY        | QVMYPPGYKTQG    | Q8IV90             | WASP-4                                 |
| 511           | PPGY        | SANLPPGYLNLN    | CAI41411           | dedicator of cytokinesis 11            |
| 512           | PPGY        | QAALPPGYSNLL    | AAH69026           | SP5 protein                            |
| 513           | PPGY        | LFSVPPGYLRYT    | AAH52586           | hypothetical protein                   |
| 514           | PPGY        | LSYSPPGYMPNT    | BAC04092           | unnamed protein                        |
| 515           | PPGY        | WIIAPPGYEAYE    | AAH69080           | BMP10                                  |
| 516           | PPGY        | WIVAPPGYQAFY    | BAA06410           | BMP4                                   |
| 517           | PPGY        | WIVAPPGYHAFY    | NP_001191          | BMP2                                   |
| 518           | PPGY        | SENIPPGYEVVS    | NP_443148          | ring finger protein 157                |
| 519           | PPGY        | SDSVPPGYEPIS    | NP_056061          | mahogunin, ring finger 1               |
| 520           | PPGY        | WENSPPGYEAAS    | AAV40235           | Ig mu heavy chain                      |
| 521           | PPGY        | FIGSPPGYVGHE    | AAH06257           | SKD3 protein                           |
| 522           | PPGY        | LKKEPPGYEEAM    | NP_065882          | megakaryoblastic leukemia 1 protein    |
| 523           | PPGY        | LAFMPPGYEEDM    | NP_476516          | NMDA receptor regulated 1              |
| 524           | PPGY        | NIQLPPGYQPPN    | BAC87402           | unnamed protein                        |
| 525           | PPGY        | NYQYPPGYSHHN    | NP_037367          | ribonuclease III, nuclear              |
| 526           | PPGY        | YTGLPPGYTYQF    | BAB69767           | Musashi1                               |
| 527           | PPGY        | PQFLPPGYLSAL    | CAC40654           | doublesex-mab-3 (DM) domain            |
| 528           | PPGY        | ATDSPPGYWGQG    | AAY18523           | Ig alpha heavy chain variable region   |
| 529           | PPGY        | VAGSPPGYWGQG    | AAF37621           | Ig heavy chain variable region 194-136 |
| 530           | PPGY        | KLLLPPGYFPAG    | AAI06878           | unknown                                |

| <b>SPOT #</b> | <b>PPxY</b> | <b>Sequence</b> | <b>Accession #</b> | <b>Name of the protein</b>                 |
|---------------|-------------|-----------------|--------------------|--------------------------------------------|
| 531           | PPGY        | QLKVPPGYHPLD    | NP_958786          | plectin 1                                  |
| 532           | PPGY        | NLRYPPGYFPRD    | NP_003782          | transcription factor site-1 protease       |
| 533           | PPGY        | KLRLPPGYFGLL    | BAC85476           | unnamed protein                            |
| 534           | PPGY        | LDLFPPGYSSKA    | CAI22117           | RAD54-like                                 |
| 535           | PPGY        | YSSWPPGYTFGQ    | AAA99326           | Ig kappa chain                             |
| 536           | PPGY        | YNKWPPGYTFGQ    | AAW67420           | rotavirus-specific antibody                |
| 537           | PPGY        | YNNWPPGYTFGQ    | BAC01756           | Ig kappa light chain VLJ region            |
| 538           | PPGY        | LDIYPPGYSFGQ    | CAD19960           | Ig kappa light chain variable region       |
| 539           | PPGY        | MGAPPGYRPSA     | NP_065710          | tweety 1 isoform 1                         |
| 540           | PPGY        | VRKVPPGYSIKV    | AAC50792           | Smad6                                      |
| 541           | PPGY        | LQASPPGYLTAL    | CAI22599           | ENTPD6                                     |
| 542           | PPGY        | IHGGPPGYAPYC    | NP_000251          | myosin VIIa                                |
| 543           | PPGY        | DAPKPPGYTRFV    | CAI23607           | unknown protein                            |
| 544           | PPGY        | GSPQPPGYLTFF    | NP_056998          | thioredoxin domain containing 11           |
| 545           | PPGY        | HAPYPPGYQRHF    | CAA60685           | homologue of Drosophila Fat protein        |
| 546           | PPGY        | YPDSPPGYEECV    | XP_375359          | similar to Nedd4-binding protein BEAN      |
| 547           | PPGY        | NPALPPGYSYTS    | CAH71286           | ubiquitin associated protein 2-like        |
| 548           | PPGY        | NPALPPGYSYTG    | CAI39659           | unknown protein                            |
| 549           | PPGY        | YPSLPPGYQNTT    | AAH19341           | SEC24a protein                             |
| 550           | PPGY        | YPSLPPGYQNTT    | XP_094581          | SEC24 related gene family                  |
| 551           | PPGY        | PNPCPPGYEPDD    | CAG46732           | EFEMP2                                     |
| 552           | PPGY        | AQKTPPGYFPFL    | AAG23216           | uterine-derived 14 kDa protein             |
| 553           | PPGY        | KKKRPPGYYSYL    | BAA11507           | KIAA0190 protein                           |
| 554           | PPGY        | TIRLPPGYQVKV    | CAH73896           | novel protein                              |
| 555           | PPGY        | PVRMPPGYQAEI    | AAH37531           | STXBP5L protein                            |
| 556           | PPGY        | PIYVPPGYAPQV    | CAI39726           | unknown protein                            |
| 557           | PPGY        | PIHVPPGYISQV    | AAH39297           | fibronectin type III domain containing 3B  |
| 558           | PPGY        | DGHIPPGYISQE    | CAI20371           | unknown protein                            |
| 559           | PPGY        | DGHIPPGYISQL    | NP_619538          | Tara-like protein isoform 2                |
| 560           | PPGY        | DHLPPPGYDDMY    | CAI21756           | PSMF1                                      |
| 561           | PPGY        | LCFHPPGYSEQK    | AAH63657           | GNL1 protein                               |
| 562           | PPGY        | PCWFPPGYPETK    | XP_498289          | similar to prot GOR [Homo sapiens]         |
| 563           | PPGY        | PCWFPPGYPEAK    | XP_496985          | similar to prot GOR [Homo sapiens]         |
| 564           | PPGY        | AGQVPPGYSTGG    | CAI13243           | pygopus homolog 2 (Drosophila)             |
| 565           | PPGY        | LLQGPPGYTFG     | AAB23179           | T cell receptor beta chain variable region |
| 566           | PPGY        | GLRGPPGYTFGS    | BAB18706           | T-cell receptor beta chain                 |
| 567           | PPGY        | KTATPPGYKPGS    | BAD92582           | atrophin-1 variant                         |
| 568           | PPGY        | PYATPPGYGAAF    | AAC39923           | zinc-finger helicase                       |
| 569           | PPGY        | FSNRPPGYPSQP    | NP_054790          | nuclear receptor coactivator 6             |
| 570           | PPGY        | IQRNPPGYPNMN    | CAI23483           | AT rich interactive domain 1a (SWI-like)   |
| 571           | PPGY        | FAGYPPGYPMQA    | AAT77612           | HSPC069 isoform                            |
| 572           | PPGY        | DPDLPPGYVQSL    | AAH94749           | vacuolar protein sorting 13B, isoform 4    |
| 573           | PPGY        | AAPPPPGYHQNG    | NP_004989          | myosin IE                                  |
| 574           | PPGY        | LQAPPPGYTPFS    | BAC86627           | unnamed protein                            |
| 575           | PPGY        | LGPPPPGYHPFL    | CAI22504           | novel protein                              |
| 576           | PPGY        | KFLPPPGYAPCY    | CAI15936           | ryanodine receptor 2 (cardiac)             |

| <b>SPOT #</b> | <b>PPxY</b> | <b>Sequence</b> | <b>Accession #</b> | <b>Name of the protein</b>                    |
|---------------|-------------|-----------------|--------------------|-----------------------------------------------|
| 577           | PPGY        | KFLPPPGYAPCH    | AAA60294           | ryanodine receptor                            |
| 578           | PPGY        | GVAHPPGYPLFT    | NP_060269          | hypothetical protein                          |
| 579           | PPGY        | PLTVPPGYTFPP    | BAC87237           | unnamed protein                               |
| 580           | PPGY        | GVPSPPGYMSDQ    | AAS90302           | putative NY-REN-37 antigen isoform 4          |
| 581           | PPGY        | SYPEPPGYTFEE    | CAH71466           | unknown protein                               |
| 582           | PPGY        | SYPSPPGYIFDN    | CAH56241           | hypothetical protein                          |
| 583           | PPGY        | TEGPPPGYSVSP    | AAQ93018           | hypothetical protein                          |
| 584           | PPGY        | GPLPPPGYGTPL    | NP_037411          | hypothetical protein LOC745                   |
| 585           | PPGY        | QRLPPPGYGRPP    | AAN87336           | enamelin                                      |
| 586           | PPGY        | YGAPPPGYGAPP    | CAI41694           | unknown protein                               |
| 587           | PPGY        | RTGTPPGYRGTS    | BAD92582           | atrophin-1 variant                            |
| 588           | PPGY        | SFGTPPGYG       | AAA35595           | bcr/able fusion protein                       |
| 589           | PPGY        | AHGPPPGYGCAA    | NP_004355          | CCAAT/enhancer binding protein alpha          |
| 590           | PPGY        | SFGTPPGYGC      | CAA32806           | unnamed protein                               |
| 591           | PPGY        | SFGTPPGYGCAA    | AAH66122           | BCR protein                                   |
| 592           | PPGY        | SARPPPGYGCAA    | CAA60698           | HP8 peptide                                   |
| 593           | PPGY        | TLITPPGYPNVK    | NP_115814          | I(3)mbt-like 3 isoform a                      |
| 594           | PPGY        | AITTPPGYPPQG    | CAI40791           | zinc finger, DHHC domain containing 16        |
| 595           | PPGY        | SVMPPPGYPHIP    | NP_055762          | forkhead box J3                               |
| 596           | PPGY        | AVSAPPGYPEGP    | CAE11867           | hypothetical protein                          |
| 597           | PPGY        | IYLPPPGYQLVP    | NP_079092          | rabaptin, RAB GTPase binding protein          |
| 598           | PPGY        | HISPPPGYPSQD    | NP_057413          | Scm-like with four mbt domains 1              |
| 599           | PPGY        | PETPPPGYLSED    | BAD92853           | MAD, mothers against decapentaplegic homolog  |
| 600           | PPGY        | GLTPPPGYLSED    | BAA22032           | Smad 3                                        |
| 601           | PPGY        | PCQPPPGYAPVP    | CAI42725           | retinoic acid induced 2                       |
| 602           | PPGY        | RSSPPPGYIPDE    | BAD92200           | protein kinase MEKK2b variant                 |
| 603           | PPGY        | RSSPPPGYVPER    | AAH08336           | unknown protein                               |
| 604           | PPGY        | PFVPPPGYMMYT    | CAI12358           | centrosomal protein 1                         |
| 605           | PPGY        | PSVPPPGYMPRQ    | XP_037523          | KIAA1076 protein                              |
| 606           | PPGY        | PLSPPPGYPTGL    | NP_787071          | sine oculis homeobox homolog 5                |
| 607           | PPGY        | PFGEPPGYYYR     | AAL59368           | anti-cardiolipin Ig heavy chain               |
| 608           | PPGY        | PSMGPPGYGGNP    | NP_003067          | SWI/SNF-related matrix-associated regulator   |
| 609           | PPGY        | FFGCPPGYRWIA    | NP_001028190       | beta-defensin 137                             |
| 610           | PPGY        | LPSCPPGYFDAR    | CAI15785           | novel protein                                 |
| 611           | PPGY        | LHDCPPGYFGIR    | CAB65783           | unknown protein                               |
| 612           | PPGY        | PPMPPPGYFGQA    | BAC86297           | unnamed protein                               |
| 613           | PPGY        | PPPEPPGYVCSL    | CAI19685           | chromosome 20 open reading frame 121          |
| 614           | PPGY        | PPSEPPGYVLSD    | XP_499101          | hypothetical protein                          |
| 615           | PPGY        | AFQGPPGYSGYP    | AAH17901           | PLSCR1 protein                                |
| 616           | PPGY        | FPPPPPGYNASS    | CAH70476           | SCEL                                          |
| 617           | PPGY        | LPPPPPGYPAPK    | CAI22163           | espin                                         |
| 618           | PPGY        | FEPPPPGYENVS    | NP_001014986       | folate hydrolase 1 isoform 2                  |
| 619           | PPGY        | AEAGPPGYPCPA    | CAI43206           | tafazzin (cardiomyopathy, dilated 3a)         |
| 620           | PPGY        | GYPIPPGYAAFP    | CAH71706           | tyrosine kinase-like orphan receptor          |
| 621           | PPGY        | PPPTPPGYIGIP    | AAY40909           | unknown protein                               |
| 622           | PPGY        | PPPTPPGYLGIS    | NP_057424          | PDZ domain-containing guanine exchange factor |

| <b>SPOT #</b> | <b>PPxY</b> | <b>Sequence</b> | <b>Accession #</b> | <b>Name of the protein</b>                       |
|---------------|-------------|-----------------|--------------------|--------------------------------------------------|
| 623           | PPGY        | GSAGPPGYPGPR    | BAD92412           | collagen, type V, alpha 3 preproprotein          |
| 624           | PPGY        | GPQGPPGYGKMG    | AAQ15204           | unknown protein                                  |
| 625           | PPGY        | GPPGPPGYGPAG    | CAH74130           | collagen, type IV, alpha 1                       |
| 626           | PPGY        | GPPGPPGYGSQG    | EAL24306           | similar to Matn2-prov protein                    |
| 627           | PPGY        | GPAGPPGYGPQG    | AAAY24251          | unknown protein                                  |
| 628           | PPGY        | GPPGPPGYKGF     | AAAY14670          | unknown protein                                  |
| 629           | PPGY        | GPPGPPGYPGKQ    | S32436             | collagen alpha 2(IX) chain                       |
| 630           | PPGY        | GPPGPPGYCDSS    | CAH71310           | collagen, type XII, alpha 1                      |
| 631           | PPGY        | GARGPPGYRGPT    | CAI95768           | COL9a3                                           |
| 632           | PPGY        | GTRGPPGYRGPT    | CAA62495           | alpha 3 type IX collagen                         |
| 633           | PPGY        | GSAGPPGYPLQG    | S20375             | S20375 collagen alpha 3(V) chain                 |
| 634           | PPGY        | EDEGPPGYPEPL    | CAE77681           | transcription factor EB                          |
| 635           | PPGY        | MYPCPPGYPYPP    | AAP97175           | WW-domain binding protein 2                      |
| 636           | PPGY        | FSAPPPGYEQDS    | XP_372128          | similar to osteotesticular phosphatase           |
| 637           | PPGY        | LCPSPPGYLCTL    | AAQ89043           | unknown protein                                  |
| 638           | PPGY        | FCPAPPGYLRQG    | NP_114440          | zinc finger protein 278 short isoform            |
| 639           | PPGY        | CVPTPPGYEGPG    | AAB31968           | gooseoid homeobox protein (transcription factor) |
| 640           | PPGY        | LCPEPPGYTGPV    | AAH67365           | hypothetical protein                             |
| 641           | PPGY        | FCSCPPGYILLD    | CAD62618           | unnamed protein                                  |
| 642           | PPGY        | LCGCPPGYRVRG    | NP_001990          | fibrillin 2 precursor                            |
| 643           | PPGY        | LCGCPPGYFRIG    | NP_000129          | fibrillin 1                                      |
| 644           | PPGY        | ACQCPPGYQKRG    | BAD92449           | EGF-containing fibulin-like protein              |
| 645           | PPGY        | RCICPPGYEVKS    | NP_001990          | fibrillin 2 precursor                            |
| 646           | PPGY        | RCICPPGYSLQN    | NP_000129          | fibrillin 1                                      |
| 647           | PPGY        | QCICPPGYQLTH    | CAI17860           | unknown protein                                  |
| 648           | PPGY        | QCECPPGYHLSE    | NP_115823          | fibrillin 3 precursor                            |
| 649           | PPGY        | TCTCPPGYGGFH    | BAD92684           | Notch homolog 3 variant                          |
| 650           | PPGY        | VCQCPPGYTGSS    | CAI16682           | laminin, alpha 2 (merosin)                       |
| 651           | PPGY        | NCLCPPGYTGSR    | CAI18564           | Notch homolog 4                                  |
| 652           | PPGY        | RCTCPPGYTGLR    | BAD92684           | Notch homolog 3 variant                          |
| 653           | PPGY        | RCICPPGYAGDH    | NP_000205          | jagged 1 precursor                               |
| 654           | PPGY        | ICLCPPGYTGEH    | AAB48068           | aggrecan epidermal growth factor-like domain-1   |
| 655           | PPGY        | HCLCPPGYGLH     | NP_061947          | delta-like 4 protein precursor                   |
| 656           | PPGY        | SCTCPPGYVFRT    | NP_001990          | fibrillin 2 precursor                            |
| 657           | PPGY        | QCSCPPGYRGPS    | CAH71870           | heparan sulfate proteoglycan 2 (perlecan)        |
| 658           | PPGY        | QCSCPPGYLGPS    | AAB21121           | heparan sulfate proteoglycan core protein; HSPG  |
| 659           | PPGY        | LCSCPPGYQGRS    | BAD92684           | Notch homolog 3 variant                          |
| 660           | PPGY        | ECRCPPGYIGLS    | CAH71870           | heparan sulfate proteoglycan 2 (perlecan)        |
| 661           | PPGY        | ECRCPPGYTGAF    | CAH18275           | hypothetical protein                             |
| 662           | PPGY        | HCHCPPGYTGRY    | AAP97299           | hypothetical protein                             |
| 663           | PPGY        | SCTCPPGYTGRN    | CAB89569           | delta-like 1                                     |
| 664           | PPGY        | LCKCPPGYSGTI    | BAD92160           | crumbs homolog 1 isoform II precursor variant    |
| 665           | PPGY        | ACFCPPGYIINH    | AAAY24266          | unknown protein                                  |
| 666           | PPGY        | CGACPPGYSGNG    | NP_003237          | thrombospondin 1 precursor                       |
| 667           | PPGY        | CQACPPGYQGDG    | CAI40246           | cubilin (intrinsic factor-cobalamin receptor)    |
| 668           | PPGY        | CEACPPGYSGPT    | BAD96936           | cartilage oligomeric matrix protein precursor    |

| <b>SPOT #</b> | <b>PPxY</b> | <b>Sequence</b> | <b>Accession #</b> | <b>Name of the protein</b>                  |
|---------------|-------------|-----------------|--------------------|---------------------------------------------|
| 669           | PPHY        | VLIGPPHYEQT     | AAA51620           | integrin alpha subunit precursor            |
| 670           | PPHY        | VSGSPPHYFYWS    | CAH71870           | heparan sulfate proteoglycan 2 (perlecan)   |
| 671           | PPHY        | DGGVPPHYVKHL    | XP_351949          | similar to transcript Y 7 protein           |
| 672           | PPHY        | LCNTPPHYHGFP    | AAH94737           | Toll-like receptor 3                        |
| 673           | PPHY        | IGLSPPHYGHYG    | AAH35761           | Sec24-related protein D                     |
| 674           | PPHY        | VTFRPPHYGAYI    | AAB23443           | dopamine transporter; DAT                   |
| 675           | PPHY        | AHQQPPHYTTSA    | AAH35583           | KIAA0999 protein                            |
| 676           | PPHY        | HNFEPPHYDGIE    | NP_060111          | kinesin family member 21a                   |
| 677           | PPHY        | SQGLPPHYDDVE    | AAH14928           | MYC induced nuclear antigen, isoform 2      |
| 678           | PPHY        | FQALPPHYGRPY    | XP_376567          | KIAA1856 protein                            |
| 679           | PPHY        | FDWLPPHYYYYY    | AAK13923           | Ig heavy chain variable region              |
| 680           | PPHY        | KGSLPPHYALTV    | CAD38989           | hypothetical protein                        |
| 681           | PPHY        | SKTVPPHYPVVC    | CAI15382           | death effector domain containing            |
| 682           | PPHY        | GPQGPPHYTDQP    | CAG38808           | SOX10                                       |
| 683           | PPHY        | YGPPPPHYEGRR    | AAH69184           | HNRPL protein                               |
| 684           | PPHY        | KPPLPPHYTSTA    | CAH73715           | OTU domain containing 1                     |
| 685           | PPHY        | QPTPPPHYRLED    | NP_005178          | myeloid translocation gene-related protein  |
| 686           | PPHY        | QQLPPPHYRTL     | CAD89974           | hypothetical protein                        |
| 687           | PPHY        | QQLPPPHYRSAT    | AAH65371           | RICS protein                                |
| 688           | PPHY        | GMSVPPHYQYIP    | CAI10960           | nuclear receptor subfamily 6                |
| 689           | PPHY        | PPSSPPHYQRVP    | CAI41286           | RALBP1 associated Eps domain containing 2   |
| 690           | PPHY        | PQLSPPHYQPYP    | AAC51802           | ORF2                                        |
| 691           | PPHY        | RTPGPPHYPPPH    | AAQ06680           | unknown protein                             |
| 692           | PPHY        | KDDAPPHYPPPS    | CAI13266           | zinc finger protein 67 homolog              |
| 693           | PPHY        | APPTPPHYPPHE    | AAH47240           | hypothetical protein                        |
| 694           | PPHY        | PSRPPPHYPGIK    | AAY24199           | unknown protein                             |
| 695           | PPHY        | PSRPPPHYPGIK    | NP_003485          | dysferlin                                   |
| 696           | PPHY        | PPPPPPHYPVLQ    | NP_037411          | hypothetical protein                        |
| 697           | PPHY        | PWPPPPHYSIAL    | XP_373838          | hypothetical protein                        |
| 698           | PPHY        | PPGLPPHYPVAV    | BAA92556           | KIAA1318 protein                            |
| 699           | PPHY        | YQFTPPHYTTP     | AAH28030           | pyruvate dehydrogenase phosphatase          |
| 700           | PPHY        | LYLPPPHYVGPH    | NP_060215          | BCL-6 interacting corepressor               |
| 701           | PPHY        | TAQPPPHYGPTQ    | AAI03904           | G protein pathway suppressor                |
| 702           | PPHY        | KPGSPPHYLLRY    | AAR02893           | Ig lambda light chain variable region       |
| 703           | PPHY        | CGLAPPHYPTLL    | AAH53361           | ZNF384 protein                              |
| 704           | PPHY        | TSDSPPHYADSV    | AAY21229           | Ig heavy chain variable region              |
| 705           | PPHY        | QKFCPPHYPDSQ    | CAH70655           | unknown protein                             |
| 706           | PPHY        | RKCVPPHYKEAE    | NP_036588          | translocase of inner mitochondrial membrane |
| 707           | PPHY        | MSFHPPHYLAAR    | CAI96105           | chromosome 9 open reading frame 10          |
| 708           | PPHY        | QSEKPPHYLESR    | CAI13670           | insulin-degrading enzyme                    |
| 709           | PPHY        | VPPHYKKLF       | AAA02731           | antigen, T-cell receptor                    |
| 710           | PPHY        | FHSVPPHYTELL    | BAB70872           | unnamed protein                             |
| 711           | PPHY        | SGIYPPHY        | PT0301             | Ig heavy chain CRD3 region                  |
| 712           | PPHY        | SSVHPPHYFFTY    | NP_036307          | F-box only protein 3 isoform 1              |
| 713           | PPHY        | SAINPPHYELIY    | AAH45618           | unknown protein                             |
| 714           | PPHY        | DNTDPPHYEETS    | AAH40138           | SLC12a1 protein                             |

| <b>SPOT #</b> | <b>PPxY</b> | <b>Sequence</b> | <b>Accession #</b> | <b>Name of the protein</b>                        |
|---------------|-------------|-----------------|--------------------|---------------------------------------------------|
| 715           | PPHY        | GGRAPPHYGYTF    | AAG15806           | T cell receptor beta chain                        |
| 716           | PPHY        | ACVDPPHYEEYH    | XP_371680          | hypothetical protein XP_371680                    |
| 717           | PPHY        | AARAPPHYEQYF    | BAA09407           | T-cell receptor beta chain V2-D-J2.7-C2 region    |
| 718           | PPHY        | VQCFPPHYEIFK    | CAH10613           | hypothetical protein                              |
| 719           | PPHY        | EVFDPPHYELFS    | CAG33536           | NETO2                                             |
| 720           | PPHY        | EVFEPPHYELCT    | NP_620416          | neuropilin-and tolloid-like protein               |
| 721           | PPHY        | KVTLPPHYRYGM    | CAI16346           | mitochondrial ribosomal protein L24               |
| 722           | PPHY        | LVNMPPHYRYLC    | NP_001012527       | membrane-associated transporter protein isoform b |
| 723           | PPHY        | SLSFPPHYFGLQ    | XP_373037          | similar to ring finger protein 129                |
| 724           | PPIY        | FNIPPPIYTSRA    | BAD92934           | v-erb-A oncogene homolog 4                        |
| 725           | PPIY        | VKGNPPIYRFWK    | NP_001726          | complement component 5                            |
| 726           | PPIY        | SEYKPPIYHFYS    | NP_478129          | tectorin beta                                     |
| 727           | PPIY        | IAMAPPIYTDVL    | AAV38601           | cytochrome c-1                                    |
| 728           | PPIY        | CARAPPIYDYVG    | CAB66373           | Ig heavy chain variable region                    |
| 729           | PPIY        | KSEAPPIYLQVS    | NP_037402          | testes-specific protease                          |
| 730           | PPIY        | ILQWPPIYTAAR    | AAH70355           | CYLC1 protein                                     |
| 731           | PPIY        | REPGPPIYAAPS    | NP_115835          | embryonal Fyn-associated substrate                |
| 732           | PPIY        | ARLLPPIYSLVF    | AAD47676           | C-C chemokine receptor                            |
| 733           | PPIY        | KRFTPPIYQPKF    | NP_115727          | mitochondrial ribosomal protein L45               |
| 734           | PPIY        | KRFTPPIYQPKK    | AAI05298           | unknown protein                                   |
| 735           | PPIY        | KDDIPPIYPTSP    | CAI20353           | unknown protein                                   |
| 736           | PPIY        | LTFNPPIYGADV    | CAH71021           | jumonji domain containing 2a                      |
| 737           | PPIY        | HPGNPPIYGADI    | XP_372429          | similar to FLJ10251 protein                       |
| 738           | PPIY        | LKELPPIYSQYM    | XP_373636          | hypothetical protein                              |
| 739           | PPIY        | NGSVPPPIYVPPG   | CAH73933           | unknown protein                                   |
| 740           | PPIY        | AEYAPPIYAEM     | CAH71259           | nuclear pore membrane glycoprotein 210-like       |
| 741           | PPIY        | NVIDPPIYARHI    | AAH30828           | EGF-like repeats domain-containing protein        |
| 742           | PPIY        | EGKLPPIYKVRE    | CAH73213           | novel protein                                     |
| 743           | PPIY        | CTSKPPIYLQHQ    | NP_659499          | hypothetical protein                              |
| 744           | PPIY        | IYKKPPIYKQRE    | BAD92955           | dematin variant                                   |
| 745           | PPIY        | IYRKPPIYKQHA    | NP_001003407       | actin-binding LIM protein 1 isoform b             |
| 746           | PPIY        | IYRKPPIYRQHA    | CAG38376           | actin binding LIM protein family member 2         |
| 747           | PPIY        | IYRKPPIYKQHV    | CAI40132           | actin binding LIM protein 1                       |
| 748           | PPIY        | IYRKPPIYKQHR    | AAC51676           | actin-binding double-zinc-finger protein          |
| 749           | PPIY        | IYRKPPIYKRHG    | NP_055760          | actin binding LIM protein family, member 3        |
| 750           | PPIY        | QYGDPPPIYVMEN   | NP_997221          | ortholog of mouse hydrolase                       |
| 751           | PPIY        | EYNDPPIYVTEN    | NP_002290          | lactase-phlorizin hydrolase preproprotein         |
| 752           | PPIY        | PQQYPPPIYPSHY   | CAI19419           | novel protein                                     |
| 753           | PPIY        | PSIHPPPIYPSIH   | BAC87585           | unnamed protein                                   |
| 754           | PPIY        | PSIHPPPIYPCIH   | BAC87585           | unnamed protein                                   |
| 755           | PPIY        | PSMHPPPIYPFYI   | BAC87447           | unnamed protein                                   |
| 756           | PPIY        | PCLSPPIYTTFQ    | BAB15275           | unnamed protein                                   |
| 757           | PPIY        | PYLYPPIYTITS    | BAB15275           | unnamed protein                                   |
| 758           | PPIY        | TSSDPPIYSRRN    | CAI22610           | novel protein                                     |
| 759           | PPIY        | PMLNPPIYSLRN    | DAA04726           | TPA: olfactory receptor OR11-150                  |
| 760           | PPIY        | AHAEPPIYSLRN    | BAC05830           | seven transmembrane helix receptor                |

| <b>SPOT #</b> | <b>PPxY</b> | <b>Sequence</b> | <b>Accession #</b> | <b>Name of the protein</b>                          |
|---------------|-------------|-----------------|--------------------|-----------------------------------------------------|
| 761           | PPIY        | DSKDPPIYSVGA    | AAH39260           | hypothetical protein                                |
| 762           | PPIY        | QGNPPPIYVGSS    | AAH47468           | polypeptide N-acetylgalactosaminyltransferase       |
| 763           | PPIY        | NKTYPPIIY       | XP_378379          | hypothetical protein                                |
| 764           | PPIY        | NQSHPPIIDLTA    | CAH71060           | lipase-like, ab-hydrolase domain containing         |
| 765           | PPIY        | DGQEPPIYELTS    | AAC50602           | FADD-homologous ICE/CED-3-like protease             |
| 766           | PPIY        | PGNWPPIYCKSD    | CAH69955           | novel protein                                       |
| 767           | PPIY        | PHTAPPIYLNSD    | BAD92944           | low density lipoprotein-related protein             |
| 768           | PPIY        | PGTAPPIYQLNA    | AAG35736           | IMPACT                                              |
| 769           | PPKY        | AKPEPPKYGIVQ    | CAI12788           | novel protein                                       |
| 770           | PPKY        | SPIRPPKYTYK     | BAD18608           | unnamed protein                                     |
| 771           | PPKY        | ETFPPKYLHYD     | AAF20168           | osteoprotegerin                                     |
| 772           | PPKY        | QETFPPKYLHYD    | AAH30155           | osteoprotegerin, precursor                          |
| 773           | PPKY        | RCGRPPKYNASC    | CAI42941           | zinc finger protein 630                             |
| 774           | PPKY        | KRGRPPKYNAVL    | CAH10542           | hypothetical protein                                |
| 775           | PPKY        | RIGRPPKYRKIP    | CAI42317           | L3MBTL                                              |
| 776           | PPKY        | RVSRPPKYKAKD    | CAB70759           | hypothetical protein                                |
| 777           | PPKY        | LSGVPPKYHLLP    | BAC04773           | unnamed protein                                     |
| 778           | PPKY        | LDGCPPKYAKTL    | CAH18708           | hypothetical protein                                |
| 779           | PPKY        | LDEGPPKYTKSV    | BAD96713           | FK506-binding protein 3 variant                     |
| 780           | PPKY        | PEEIPPKYCSMM    | CAI19975           | chromosome 6 open reading frame 70                  |
| 781           | PPKY        | DAADPPKYVLR     | CAI13089           | unknown protein                                     |
| 782           | PPKY        | EVTIPPKYRELL    | NP_001741          | calpastatin isoform a                               |
| 783           | PPKY        | KMRSPPKYRPFL    | BAD96278           | transcription termination factor-like protein       |
| 784           | PPKY        | TLAVPPKY        | AAG29575           | hemochromatosis splice variant                      |
| 785           | PPKY        | CMAVPPKYRHMQ    | AAD53327           | RNA lariat debranching enzyme                       |
| 786           | PPKY        | FASGPPKYKDNP    | NP_115765          | zinc finger protein 289, ID1 regulated              |
| 787           | PPKY        | ESGPPKYSDEV     | NP_002490          | neogenin homolog 1                                  |
| 788           | PPKY        | NLTLPPKYNQPF    | CAH72178           | tripeptidyl peptidase II                            |
| 789           | PPKY        | SLIIPPKYQTPP    | NP_056150          | thyroid hormone receptor associated protein         |
| 790           | PPKY        | FIRYPPKYSTPP    | NP_055755          | MON1 homolog B                                      |
| 791           | PPKY        | PLFGPPKYAQTF    | AAX57539           | anti-HSP60 Ig heavy chain variable region           |
| 792           | PPKY        | FTRKPPKYERFI    | AAH05288           | TGF beta-inducible nuclear protein 1                |
| 793           | PPKY        | FIRKPPKYERLI    | XP_293342          | similar to TGF beta-inducible nuclear protein       |
| 794           | PPKY        | GSETPPKYTSAL    | AAH45546           | GRIA4 protein                                       |
| 795           | PPKY        | GTEQPPKYEDVV    | AAH65531           | protein phosphatase 2                               |
| 796           | PPKY        | YSDPPPKEYEEIV   | NP_076987          | proline rich Gla (G-carboxyglutamic acid)           |
| 797           | PPKY        | WKGWPPKYSTWE    | AAY68391           | chromobox-like 7                                    |
| 798           | PPKY        | LTWNPPKYDGGS    | CAD12456           | titin                                               |
| 799           | PPKY        | LSWGPPKYDGGS    | CAD12456           | titin                                               |
| 800           | PPKY        | LKWEPPKYDGGS    | CAD12456           | titin                                               |
| 801           | PPKY        | AQWLPPKYWGQG    | AAD30781           | Ig heavy chain variable region                      |
| 802           | PPKY        | FPMNPPKYDKIE    | NP_060004          | myosin, heavy polypeptide 2, skeletal muscle, adult |
| 803           | PPKY        | FSMNPPKYDKIE    | NP_060003          | myosin, heavy polypeptide 4, skeletal muscle        |
| 804           | PPKY        | VPSGPPKYPTAE    | NP_659493          | hypothetical protein                                |
| 805           | PPKY        | YRTNPPKYPSKQ    | NP_002578          | protocadherin 1 isoform 1 precursor                 |
| 806           | PPKY        | KESVPPKYPGDS    | CAI12440           | t-complex 11 (mouse)                                |

| <b>SPOT #</b> | <b>PPxY</b> | <b>Sequence</b> | <b>Accession #</b> | <b>Name of the protein</b>                            |
|---------------|-------------|-----------------|--------------------|-------------------------------------------------------|
| 807           | PPKY        | KKKLPPKYPHCQ    | AAW49290           | envelope protein                                      |
| 808           | PPKY        | CDSRPPKYPRKS    | XP_063202          | similar to 60S ribosomal protein L23a                 |
| 809           | PPKY        | RYNWPPKYTFGQ    | AAK93957           | anti-oxidized LDL autoantibody variable kappa chain   |
| 810           | PPKY        | YGSSPPKYTFG     | AAM46461           | Ig kappa light chain variable region                  |
| 811           | PPKY        | YGSSPPKYTFGQ    | CAD19957           | Ig kappa light chain variable region                  |
| 812           | PPKY        | EAFEPKYLMLG     | CAI21605           | unknown protein                                       |
| 813           | PPKY        | EVLCPKYLKLS     | BAA91794           | unnamed protein                                       |
| 814           | PPKY        | LKMPPPKYVLWS    | BAC85425           | unnamed protein                                       |
| 815           | PPKY        | SKVKPPKYLLDS    | NP_006827          | GCN1 general control of amino-acid synthesis 1-like 1 |
| 816           | PPKY        | GCRGPPKYGSPG    | XP_496843          | similar to Uncx4.1                                    |
| 817           | PPKY        | SSAIPPKYVNGS    | NP_079452          | hypothetical protein                                  |
| 818           | PPKY        | PAQLPPKYQLGS    | NP_002648          | pleiomorphic adenoma gene-like 2                      |
| 819           | PPKY        | GGDIPPKYFVVT    | AAH31074           | poly (ADP-ribose) polymerase family, member 16        |
| 820           | PPKY        | GARIPPKYEVSH    | NP_705900          | copine 7 isoform a                                    |
| 821           | PPKY        | QLETPPKYHTQI    | NP_955453          | suppressor of cytokine signaling 4                    |
| 822           | PPKY        | LLFKPPKYHPDV    | CAA31128           | unnamed protein                                       |
| 823           | PPKY        | VSNQPPKYTQPS    | AAH51795           | atrophin-1                                            |
| 824           | PPKY        | KGSLPPKYALEL    | NP_058197          | 2'-5'-oligoadenylate synthetase 2 isoform 1           |
| 825           | PPKY        | SVCIPPKYGYLG    | AAH96745           | CXorf20 protein                                       |
| 826           | PPKY        | DYVAPPKYKSSL    | NP_775847          | hypothetical protein                                  |
| 827           | PPKY        | GYLAPPKYLQSG    | AAY21823           | FOXL2                                                 |
| 828           | PPKY        | LPPFPKYYLAM     | NP_689841          | hypothetical protein                                  |
| 829           | PPKY        | PGTPPKYNTLR     | NP_001030          | sodium channel, nonvoltage-gated 1, gamma             |
| 830           | PPKY        | DGGHPPKYFHNH    | XP_497521          | similar to Serine/threonine-protein kinase PLK1       |
| 831           | PPLY        | YRSTPPLYRHAA    | NP_005242          | forkhead box C2                                       |
| 832           | PPLY        | VCLCPPLYTGQF    | XP_371829          | similar to Neurogenic locus Notch protein             |
| 833           | PPLY        | EYTFPPLYYRRA    | AAG44697           | unknown protein                                       |
| 834           | PPLY        | LLEDPPPLYGEIL   | CAI12790           | unknown protein                                       |
| 835           | PPLY        | AARQPPLYGRDL    | AAH15693           | MYO1G protein                                         |
| 836           | PPLY        | ELRLPPLYGDNL    | AAB18268           | DNA polymerase gamma                                  |
| 837           | PPLY        | IEDLPPLYTLNK    | AAH65545           | RNA-specific adenosine deaminase B1                   |
| 838           | PPLY        | FDLAPPLYPCTL    | BAC85378           | unnamed protein                                       |
| 839           | PPLY        | DRFDPPPLYGSL    | XP_040592          | zinc finger protein 469                               |
| 840           | PPLY        | LSKLPPPLYLTHS   | BAC03384           | unknown protein                                       |
| 841           | PPLY        | IMQVPPPLYSALK   | NP_631908          | TruB pseudouridine (psi) synthase homolog             |
| 842           | PPLY        | KCHTPPLYRMRI    | BAD96367           | ribosomal protein L18a variant                        |
| 843           | PPLY        | SLTHPPLYESVT    | 1CZM               | carbonic anhydrase I                                  |
| 844           | PPLY        | IQFKPPLYRQRY    | CAI12931           | novel protein                                         |
| 845           | PPLY        | QVCGPPLYQLGA    | BAC11010           | telomerase reverse transcriptase                      |
| 846           | PPLY        | LACEPPLYSVSS    | AAC33409           | nuclear mitotic apparatus protein                     |
| 847           | PPLY        | SDMKPPLYLNYL    | XP_372952          | similar to Ig kappa chain precursor V region          |
| 848           | PPLY        | IFCPPPLYYTNL    | AAH36663           | KIAA1383 protein                                      |
| 849           | PPLY        | LTSLPPLYRVQL    | BAA74879           | KIAA0856 protein                                      |
| 850           | PPLY        | LSSPPPLYRITL    | XP_372913          | similar to CG3047-Pa                                  |
| 851           | PPLY        | AEGPPPLYNTNH    | NP_060886          | forkhead box J2                                       |
| 852           | PPLY        | GEGDPPLYVNVN    | BAA13203           | KIAA0212 protein                                      |

| <b>SPOT #</b> | <b>PPxY</b> | <b>Sequence</b> | <b>Accession #</b> | <b>Name of the protein</b>                    |
|---------------|-------------|-----------------|--------------------|-----------------------------------------------|
| 853           | PPLY        | VYDGPPLYDDVK    | CAD13144           | TPIP alpha lipid phosphatase                  |
| 854           | PPLY        | VFDGPPLYDDVK    | AAP45144           | phosphatase TPTE gamma isoform                |
| 855           | PPLY        | VFNCPPPLYDDVK   | XP_495953          | similar to TPTE and PTEN lipid phosphatase    |
| 856           | PPLY        | WASAPPLYTLID    | AAH43386           | hypothetical protein                          |
| 857           | PPLY        | RANLPPLYALEL    | AAD28541           | oligoadenylate synthetase-related protein p56 |
| 858           | PPLY        | YCAKPPLYNWND    | CAB37124           | Ig heavy chain variable region                |
| 859           | PPLY        | QAAFPPPLYKELF   | NP_001001523       | RAR-related orphan receptor C                 |
| 860           | PPLY        | NTLFPPLYKELF    | CAA69929           | nuclear orphan receptor ROR-bet               |
| 861           | PPLY        | RLHFPPPLYKELF   | NP_599022          | RAR-related orphan receptor A                 |
| 862           | PPLY        | CRAFPPPLYEDIM   | BAA86601           | KIAA1287 protein                              |
| 863           | PPLY        | AFRHPPPLYGPA    | NP_001980          | even-skipped homeo box 1                      |
| 864           | PPLY        | STLVPPPLYGETA   | XP_497985          | similar to ribosomal protein L6               |
| 865           | PPLY        | TRGQPPLYHLRE    | CAD97995           | hypothetical protein                          |
| 866           | PPLY        | YGYEPPPLYEPP    | NP_079527          | KIAA1688 protein                              |
| 867           | PPLY        | TLHAPPLYNHYS    | AAH16181           | hypothetical protein                          |
| 868           | PPLY        | CDLDPPLYLAET    | AAG02004           | similar to HSPC197                            |
| 869           | PPLY        | PNSCPPLYVLWR    | CAI14016           | novel protein, KIAA0476                       |
| 870           | PPLY        | WYSSPPLYVYWF    | AAQ88735           | SIGLEC5                                       |
| 871           | PPLY        | FGRVPPPLYQLCF   | CAD98029           | hypothetical protein                          |
| 872           | PPLY        | CGELPPPLYGAEP   | AAH01750           | Cep72 protein                                 |
| 873           | PPLY        | DTDNPPLYCNPK    | AAH67527           | unknown protein                               |
| 874           | PPLY        | SINSPPLYCDSE    | AAH57228           | vitamin D-binding protein, precursor          |
| 875           | PPLY        | SHFLPPLYWLVF    | AAH95516           | CCR9 protein                                  |
| 876           | PPLY        | AQFVPPPLYSLVF   | AAL85630           | CC chemokine receptor 3                       |
| 877           | PPLY        | ARLLPPLYSLVF    | AAS19313           | CCR5 chemokine receptor                       |
| 878           | PPLY        | AQLLPPLYSLVF    | NP_000639          | chemokine (C-C motif) receptor 2 isoform B    |
| 879           | PPLY        | AHLLPPLYSLVF    | AAB65707           | CCR5 receptor                                 |
| 880           | PPLY        | ELFLPPLYSLVF    | BAA86966           | b-chemokine receptor CCR4                     |
| 881           | PPLY        | SGRHPPPLYSDHS   | AAC32592           | APXL                                          |
| 882           | PPLY        | NQRGPPLYTKHN    | NP_955629          | hypothetical protein                          |
| 883           | PPLY        | ARMRPPLYYFDY    | AAK13846           | Ig heavy chain variable region                |
| 884           | PPLY        | SATLPPLYPKSQ    | NP_060639          | hypothetical protein                          |
| 885           | PPLY        | KEYFPPLYSSES    | AAB18856           | hypothetical protein                          |
| 886           | PPLY        | MTCKPPLYMGPE    | BAC11569           | unnamed protein                               |
| 887           | PPLY        | AKVNPPLYTASP    | BAB13844           | unnamed protein                               |
| 888           | PPLY        | AAASPPLYSQVP    | NP_036318          | forkhead box E3                               |
| 889           | PPLY        | DAHSPPLYTYLT    | AAA64594           | G protein-coupled receptor                    |
| 890           | PPLY        | IPPCPPPLYEFCG   | AAG53082           | POU 5 domain protein                          |
| 891           | PPLY        | GKRHPPLYQAGL    | XP_046305          | KIAA1205 protein                              |
| 892           | PPLY        | EGLWPPLYRPRR    | NP_000255          | patched                                       |
| 893           | PPLY        | KGLWPPLYRPRR    | AAC50496           | patched gene homolog                          |
| 894           | PPLY        | SGIPPPLYTETG    | NP_694969          | hypothetical protein                          |
| 895           | PPLY        | ELSHPPPLYRLPL   | NP_008870          | son of sevenless homolog 2                    |
| 896           | PPLY        | CHALPPPLYSCPC   | NP_612433          | kinesin family member 12                      |
| 897           | PPLY        | KPGSPPLYLLRY    | AAC16866           | Ig lambda light chain variable region         |
| 898           | PPLY        | TPQRPPPLYLERI   | NP_036423          | extra spindle poles like 1                    |

| <b>SPOT #</b> | <b>PPxY</b> | <b>Sequence</b> | <b>Accession #</b> | <b>Name of the protein</b>                       |
|---------------|-------------|-----------------|--------------------|--------------------------------------------------|
| 899           | PPLY        | GSHLPPLYLDGH    | CAI40214           | unknown protein                                  |
| 900           | PPLY        | LQWEPPLYMGAG    | AAH67101           | MYOM3 protein                                    |
| 901           | PPLY        | ITWKPPPLYDGGS   | CAD12456           | titin                                            |
| 902           | PPLY        | LSWNPPLYTGGC    | CAD12456           | titin                                            |
| 903           | PPLY        | MEAEPPLYPMAG    | AAH25669           | UNC93B1 protein                                  |
| 904           | PPLY        | ASKEPPLYYGVC    | BAA31667           | KIAA0692 protein                                 |
| 905           | PPLY        | RFLPPPLYSEID    | NP_065852          | arrestin domain containing 3                     |
| 906           | PPLY        | RFQPPPLYSEVD    | AAH70100           | arrestin domain containing 4                     |
| 907           | PPLY        | RYRPPPLYSEED    | NP_056498          | arrestin domain containing 2 isoform 1           |
| 908           | PPLY        | TETPPPLYVGPC    | CAI95608           | rhomboid family 1                                |
| 909           | PPLY        | GKKPPPLYLKFH    | BAC03635           | unnamed protein                                  |
| 910           | PPLY        | GDKPPPLYLCEE    | NP_065869          | hypothetical protein                             |
| 911           | PPLY        | SKTPPPLYLPTTE   | NP_005910          | MADS box transcription enhancer factor 2         |
| 912           | PPLY        | PLEPPPLYLMED    | NP_002518          | neurotrophin 3 precursor                         |
| 913           | PPLY        | HQLTPPLYNITK    | CAH71058           | lipase-like, ab-hydrolase domain containing 2    |
| 914           | PPLY        | TVPKPPPLYCYDV   | CAI41595           | novel protein                                    |
| 915           | PPLY        | CPRPPPLYLMVP    | AAH31827           | unknown protein                                  |
| 916           | PPLY        | GTGIPPLYSTPP    | CAB62924           | unknown protein                                  |
| 917           | PPLY        | VPRPPPLYSHRM    | AAK97789           | p400 SWI2/SNF2-related protein                   |
| 918           | PPLY        | RHLPPPLYVLFV    | CAG30428           | PK1.3                                            |
| 919           | PPLY        | RNLPPPLYYRPV    | CAE46000           | hypothetical protein                             |
| 920           | PPLY        | IFPKPPPLYTFLP   | BAA20793           | KIAA0335 protein                                 |
| 921           | PPLY        | HGPLPPLYSVSL    | CAB42442           | hypothetical protein                             |
| 922           | PPLY        | MPNPPLYYQPG     | BAC86357           | unnamed protein                                  |
| 923           | PPLY        | LMPNPPLYYQPG    | BAC87313           | unnamed protein                                  |
| 924           | PPLY        | HLPCPPPLYSQPL   | CAH18687           | hypothetical protein                             |
| 925           | PPLY        | PSPVPPLYLDDD    | AAF72539           | dual specificity protein phosphatase FYVE-DSP2   |
| 926           | PPLY        | PPGVPPLYGPPM    | AAH18289           | unknown protein                                  |
| 927           | PPLY        | EPPPPPLYLADT    | BAC87574           | unnamed protein                                  |
| 928           | PPLY        | RHSNPPLYPSRP    | CAI12104           | discs, large homolog 5 (DLG5)                    |
| 929           | PPLY        | VHPPPPPLYPLRP   | NP_004865          | BCL2-associated athanogene 4                     |
| 930           | PPLY        | PVPPPPPLYPPPP   | AAL05625           | proliferation potential-related protein          |
| 931           | PPLY        | PPPPPPPLYPRRG   | XP_372542          | similar to Raf protein kinase                    |
| 932           | PPLY        | PPPPPPPLYQRVS   | AAH38446           | SF1 protein                                      |
| 933           | PPLY        | PMPIPPLYPGSN    | BAD18403           | unnamed protein                                  |
| 934           | PPLY        | YLPAPPLYCPQP    | NP_075561          | hypothetical protein                             |
| 935           | PPLY        | PAPAPPLYSSLT    | BAA03499           | KIAA0021 protein                                 |
| 936           | PPLY        | LLPPPPLYTRHR    | NP_067653          | MYG1 protein                                     |
| 937           | PPLY        | LMYPPPLYDAHE    | AAF06672           | annexin 14                                       |
| 938           | PPLY        | QLPPPPLYRPRW    | NP_067048          | basic proline-rich protein                       |
| 939           | PPLY        | GQVPPLYTGSL     | BAC87168           | unnamed protein                                  |
| 940           | PPLY        | GLDSPPLYPSAP    | AAD48370           | estrogen receptor related protein 3              |
| 941           | PPLY        | HGLLPPLYKSVK    | AAH30793           | hypothetical protein                             |
| 942           | PPLY        | NLENPPPLYKNHP   | NP_997320          | dynein, axonemal, heavy polypeptide 10 isoform 1 |
| 943           | PPLY        | DMEWPPLYNRRGK   | NP_000544          | Werner syndrome protein                          |
| 944           | PPLY        | YNNWPPLYTFGQ    | AAO11862           | Ig kappa light chain variable region             |

| <b>SPOT #</b> | <b>PPxY</b> | <b>Sequence</b> | <b>Accession #</b> | <b>Name of the protein</b>                        |
|---------------|-------------|-----------------|--------------------|---------------------------------------------------|
| 945           | PPLY        | YVGSPPPLYTFGP   | AAD19504           | Ig kappa light chain variable region              |
| 946           | PPLY        | RSSFPPPLYSSGL   | CAH71045           | unknown protein                                   |
| 947           | PPLY        | VSQFPPLYMPGL    | AAK15343           | CECR2 protein                                     |
| 948           | PPLY        | VRQNPPLYSPGL    | BAB15473           | unnamed protein                                   |
| 949           | PPLY        | WTPYPPLYSTGM    | NP_056307          | hypothetical protein                              |
| 950           | PPLY        | WSPSPPLYEYYR    | AAC33194           | unknown protein                                   |
| 951           | PPLY        | SPKYPPLYPPGR    | BAC11175           | unnamed protein                                   |
| 952           | PPLY        | VPKEPPLYRDPG    | NP_073713          | C-terminal binding protein 2 isoform 2            |
| 953           | PPLY        | IPSAPPLYLDSG    | XP_062871          | similar to centromeric protein E                  |
| 954           | PPLY        | LQQRPPLYFQAQ    | AAM28198           | unknown protein                                   |
| 955           | PPLY        | LRERPPLYQADE    | CAB66708           | hypothetical protein                              |
| 956           | PPLY        | GYGMPPLYPQTG    | NP_004545          | cytoplasmic nuclear factor of activated T-cells 4 |
| 957           | PPLY        | DRDGPPLYPWSQ    | CAD38862           | hypothetical protein                              |
| 958           | PPLY        | LQSTPPLYGWGQ    | BAC06152           | seven transmembrane helix receptor                |
| 959           | PPLY        | SYGGPPLYWGGQ    | AAS86058           | Ig heavy chain                                    |
| 960           | PPMY        | GVWVPPMYLWVL    | NP_001162          | ATP-binding                                       |
| 961           | PPMY        | SRPEPPMYIAPI    | XP_498886          | hypothetical protein                              |
| 962           | PPMY        | DQVAPPMYIWEQ    | XP_496635          | CLIP-associating protein                          |
| 963           | PPMY        | SQPAPPMYIWTL    | NP_003919          | CAAX box 1                                        |
| 964           | PPMY        | LVPQPPMYLCPS    | AAH34779           | unknown protein                                   |
| 965           | PPMY        | DILGPPMYEMEV    | AAH93912           | peroxisomal LON protease                          |
| 966           | PPMY        | LPGQPPMYSGTF    | NP_000378          | carnitine translocase                             |
| 967           | PPMY        | GQGAPPMYQLYK    | NP_008835          | protein kinase, DNA-act.                          |
| 968           | PPMY        | LVACPPMYHLMK    | NP_005144          | ubiquitin protease                                |
| 969           | PPMY        | HMQFPPMYEENS    | NP_003460          | secretogranin II                                  |
| 970           | PPMY        | WDSEPPMYHTIE    | NP_996830          | transient receptor                                |
| 971           | PPMY        | YCTLPPMYPGSS    | NP_064630          | tubby like protein 4                              |
| 972           | PPMY        | KLRIPPMYPTSQ    | A46415             | basonuclin                                        |
| 973           | PPMY        | RIWRPPMYQRDD    | NP_061323          | membrane-associated                               |
| 974           | PPMY        | LVWEPPMYDGGK    | NP_004524          | myosin binding                                    |
| 975           | PPMY        | KSNTPPMYLQAD    | AAH07449           | KIAA1627 protein                                  |
| 976           | PPMY        | VHTSPPMYSLDR    | NP_060046          | kinesin family 27                                 |
| 977           | PPMY        | ASLWPPMYGGRG    | XP_371084          | KIAA14 protein                                    |
| 978           | PPMY        | SFYFPPMYSPQQ    | CAI13663           | novel protein                                     |
| 979           | PPMY        | YNNEPPMYRKGK    | BAD96839           | interphase protein 45                             |
| 980           | PPMY        | RSNWPPMYTFGQ    | AAL10920           | Ig kappa                                          |
| 981           | PPMY        | GTHWPPMYTFGQ    | BAC01729           | Ig kappa                                          |
| 982           | PPMY        | YIDWPPMYTFGQ    | S40378             | Ig kappa                                          |
| 983           | PPMY        | SYSTPPMYTFGQ    | AAZ09063           | Ig kappa                                          |
| 984           | PPMY        | YGSSPPMYTFGQ    | AAD16630           | Ig kappa                                          |
| 985           | PPMY        | ITARPPMYEDYM    | BAB47468           | KIAA1839 protein                                  |
| 986           | PPMY        | AKAQPPMYDIL     | CAC10742           | Ig heavy                                          |
| 987           | PPMY        | CARRPPMYHFDY    | CAB44082           | Ig mu heavy                                       |
| 988           | PPNY        | FEGPPPNYINTY    | NP_056078          | Dmx-like 2                                        |
| 989           | PPNY        | SGNIPPNYQYIF    | NP_001018098       | vacuolar protein sorting 13C protein              |
| 990           | PPNY        | LAIHPPNYIVLW    | NP_060587          | bromodomain and WD containing protein             |

| <b>SPOT #</b> | <b>PPxY</b> | <b>Sequence</b> | <b>Accession #</b> | <b>Name of the protein</b>                         |
|---------------|-------------|-----------------|--------------------|----------------------------------------------------|
| 991           | PPNY        | ITYEPPNYKALD    | Q14896             | MYPC3_HUMAN Myosin-binding protein C               |
| 992           | PPNY        | SDLQPPNYEVM     | BAD96845           | target of myb1-like 1 variant                      |
| 993           | PPNY        | AQRRPPNYHFRQ    | AAH45815           | unknown protein                                    |
| 994           | PPNY        | DKNKPPNYANGN    | CAD32554           | steerin3 protein                                   |
| 995           | PPNY        | VPDYPPNYILFL    | NP_937863          | small nuclear ribonucleoprotein polypeptide        |
| 996           | PPNY        | GSPGPPNYFDYW    | ABA62050           | Ig epsilon heavy chain variable region             |
| 997           | PPNY        | VILEPPNYGIVT    | AAF63490           | mixed lineage kinase ZAK                           |
| 998           | PPNY        | SKRPPPNYLCHL    | AAH39249           | C10orf56 protein                                   |
| 999           | PPNY        | ATSLPPNYLSFQ    | Q96BY6             | dedicator of cytokinesis 10 ( zizimin 3)           |
| 1000          | PPNY        | HLTEPPNYCFHC    | CAI95569           | chromosome 6 open reading frame 40                 |
| 1001          | PPNY        | ELMFPPNYDQSK    | AAH50358           | Tax1 (HTLV) binding protein 1                      |
| 1002          | PPNY        | PGTPPPNYDSLRL   | NP_000327          | sodium channel, nonvoltage-gated 1, beta           |
| 1003          | PPNY        | DTPCPPNYQRDP    | CAI17860           | unknown protein                                    |
| 1004          | PPNY        | PYANPPNYGKPD    | AAS07522           | unknown protein                                    |
| 1005          | PPNY        | PYANPPNYGNPD    | CAG38559           | TPST2                                              |
| 1006          | PPNY        | PGPAPPNYSRPH    | BAD92550           | SWI/SNF-related regulator of chromatin             |
| 1007          | PPNY        | HLPWPPNYRCEP    | AAH26035           | C4orf9 protein                                     |
| 1008          | PPNY        | QFPYPPNYGTNP    | NP_003734          | nuclear receptor coactivator 1 isoform 1           |
| 1009          | PPNY        | QFPFPPNYGISQ    | NP_006531          | nuclear receptor coactivator 2                     |
| 1010          | PPNY        | PYPLPPNYSYGL    | BAC11695           | unnamed protein                                    |
| 1011          | PPNY        | CKERPPNYPGSL    | CAI13923           | spastic ataxia of Charlevoix-Saguenay (sacsin)     |
| 1012          | PPNY        | CARYPPNYDSS     | AAV39998           | Ig mu heavy chain                                  |
| 1013          | PPNY        | CAKFPPNYSNSW    | AAK57780           | Ig heavy chain variable region                     |
| 1014          | PPNY        | LPPQPPNYLGLK    | CAI41000           | unknown protein                                    |
| 1015          | PPNY        | YGMVPPNYCSGP    | AAH36102           | unknown protein                                    |
| 1016          | PPNY        | YGMVPPNYCSQR    | NP_038471          | ST6(sialyltransferase 6)                           |
| 1017          | PPNY        | RPEEPPNYPAAP    | AAH54499           | Smcx homolog, X chromosome                         |
| 1018          | PPNY        | SPASPPNYMYNP    | BAC11448           | unnamed protein                                    |
| 1019          | PPNY        | RFECPPNYVQVS    | NP_001989          | fibulin 2 precursor, isoform b                     |
| 1020          | PPNY        | RLECPPNYVQVS    | AAH51690           | Fibulin 2, precursor, isoform b                    |
| 1021          | PPNY        | PTFIPPNYRVKV    | CAA60685           | homologue of Drosophila Fat protein                |
| 1022          | PPNY        | SLWGPPNYSSSL    | CAI20354           | unknown protein                                    |
| 1023          | PPNY        | QPRVPPNYEGSD    | NP_001438          | FAT tumor suppressor 2 precursor                   |
| 1024          | PPNY        | AARIPPNYQGPA    | CAH71374           | zinc finger protein 318                            |
| 1025          | PPNY        | PPLGPPNYLQVS    | AAH34988           | ULK2 protein                                       |
| 1026          | PPNY        | PIFGPPNYAQKF    | AAS85799           | Ig heavy chain                                     |
| 1027          | PPNY        | PMFGPPNYAQKF    | AAB35403           | IgG4 heavy chain variable region                   |
| 1028          | PPNY        | LIFGPPNYAQKF    | AAW68851           | anti-tetanus toxoid Ig heavy chain variable region |
| 1029          | PPNY        | LSFGPPNYAQKF    | AAW68593           | anti-tetanus toxoid Ig heavy chain variable region |
| 1030          | PPNY        | GPALPPNYKSSS    | NP_061029          | hypothetical protein                               |
| 1031          | PPNY        | GPVGPPNYSEGTL   | NP_061750          | protocadherin gamma subfamily B, 7                 |
| 1032          | PPNY        | GPVVPPNYSEGTL   | NP_061749          | protocadherin gamma subfamily B, 6                 |
| 1033          | PPNY        | GPVVPPNYSQGT    | NP_061748          | protocadherin gamma subfamily B, 5                 |
| 1034          | PPNY        | ESVVPPNYSEGTL   | NP_003727          | protocadherin gamma subfamily B, 4                 |
| 1035          | PPNY        | QPEAPPNYADVVL   | AAH70100           | arrestin domain containing 4                       |
| 1036          | PPNY        | QSEAPPNYADVVL   | NP_899232          | arrestin domain containing 4                       |

| <b>SPOT #</b> | <b>PPxY</b> | <b>Sequence</b> | <b>Accession #</b> | <b>Name of the protein</b>                          |
|---------------|-------------|-----------------|--------------------|-----------------------------------------------------|
| 1037          | PPNY        | RVIRPPNYAGPL    | CAI39526           | novel protein                                       |
| 1038          | PPNY        | RVFRPPNYSGTI    | NP_006756          | tumor suppressor candidate 3                        |
| 1039          | PPNY        | TCECPPNYLGPY    | NP_001399          | cadherin EGF LaG seven-pass G-type receptor 2       |
| 1040          | PPNY        | VCICPPNYTGEL    | AAQ89243           | SLIT3                                               |
| 1041          | PPNY        | AVGMPPNYNSSM    | AAG22478           | unknown protein                                     |
| 1042          | PPNY        | TKFIPPNYHTPP    | NP_060914          | pyruvate dehydrogenase phosphatase precursor        |
| 1043          | PPNY        | RKYMPPNYEIPF    | CAB81952           | hypothetical protein                                |
| 1044          | PPNY        | SLTRPPNYFEPP    | NP_060703          | hypothetical protein                                |
| 1045          | PPNY        | NLWLPPNYKHFP    | XP_378684          | hypothetical protein                                |
| 1046          | PPNY        | YSPLPNYPLPG     | BAA91097           | unnamed protein                                     |
| 1047          | PPNY        | HRKHPPNYKKPV    | NP_001018047       | vacuolar protein sorting 13A isoform C              |
| 1048          | PPNY        | VVITPPNYYYGM    | CAB37177           | Ig heavy chain variable region                      |
| 1049          | PPNY        | DTEEPPNYDEEM    | NP_004165          | solute carrier family 9 (sodium/hydrogen exchanger) |
| 1050          | PPNY        | DETAPPNYDQWG    | AAR32390           | Ig heavy chain variable region                      |
| 1051          | PPNY        | LTSLPPNYEISE    | NP_001020403       | hypothetical protein                                |
| 1052          | PPNY        | LEKLPPNYSMHS    | CAI46160           | hypothetical protein                                |
| 1053          | PPNY        | FRKAPPNYAMKK    | NP_055953          | Paf1/RNA polymerase II complex component            |
| 1054          | PPNY        | TRQDPPNYSLRG    | AAQ15265           | AF370429_1 PP7706                                   |
| 1055          | PPNY        | SGYPPNYGMDV     | AAY33201           | anti-rabies virus Ig heavy chain variable region    |
| 1056          | PPNY        | NSGQPPNYEMLK    | CAG46672           | IFITM2                                              |
| 1057          | PPNY        | VAASPPNYEMLK    | XP_497307          | similar to interferon-induced protein               |
| 1058          | PPNY        | DSGQPPNYTLDV    | CAC94433           | Ig heavy chain variable region                      |
| 1059          | PPNY        | IYRVPPNYSPIS    | NP_443728          | hypothetical protein                                |
| 1060          | PPNY        | IFAGPPNYPFSD    | BAA05121           | dihydrodiol dehydrogenase isoform DD1               |
| 1061          | PPNY        | IFAGPPNYPISD    | AAB38486           | dihydrodiol dehydrogenase/bile acid BP              |
| 1062          | PPPY        | ESKTPPPYSVYE    | AAS07431           | unknown protein                                     |
| 1063          | PPPY        | LQKKPPPYLRNL    | NP_004214          | ubiquitin-conjugating enzyme E2L 6 isoform 1        |
| 1064          | PPPY        | NAYAPPPYYCSN    | AAS46603           | complement inhibitory receptor                      |
| 1065          | PPPY        | DFLDPPPYETLL    | CAI41883           | DEAD/H (Asp-Glu-Ala-Asp/His) box polypeptide 16     |
| 1066          | PPPY        | TLKRPPPYQWDP    | NP_064630          | tubby like protein 4                                |
| 1067          | PPPY        | SLKRPPPYDAVH    | BAA96010           | KIAA1486 protein                                    |
| 1068          | PPPY        | MYFVPPPYELSE    | CAB70774           | hypothetical protein                                |
| 1069          | PPPY        | EVEDPPPYLMMD    | AAS18318           | CDK5 regulatory subunit associated protein 1        |
| 1070          | PPPY        | EVMYPPPYLDNE    | CAD57003           | T-cell-specific surface glycoprotein                |
| 1071          | PPPY        | ELMYPPPYLGI     | AAL96664           | CTLA4                                               |
| 1072          | PPPY        | EKINPPPYLTCE    | NP_115500          | haloacid dehalogenase-like hydrolase                |
| 1073          | PPPY        | ASLGPPPYLRTE    | AAH64693           | AUTS2 protein                                       |
| 1074          | PPPY        | VQTIPPPYVVRT    | CAG38557           | HSPC142                                             |
| 1075          | PPPY        | LLCTPPPYAHGR    | AAB61917           | unknown                                             |
| 1076          | PPPY        | PYGRPPPYDRGD    | NP_008938          | cleavage and polyadenylation factor (68 kD)         |
| 1077          | PPPY        | RHYMPPPYASLT    | CAD98031           | hypothetical protein                                |
| 1078          | PPPY        | VVSSPPPYTAYA    | BAD97058           | pleckstrin homology domain containing protein       |
| 1079          | PPPY        | KKKDPPPYNLTM    | NP_004742          | glucosaminyl (N-acetyl) transferase 3, mucin type   |
| 1080          | PPPY        | DWQMPPPYVVLD    | B45874             | Ig alpha-1 chain C region                           |
| 1081          | PPPY        | DWQIPPPYVVLD    | AAA59424           | mutant Ig alpha chain                               |
| 1082          | PPPY        | PTFIPPPYGVLR    | NP_002117          | hepatic leukemia factor                             |

| <b>SPOT #</b> | <b>PPxY</b> | <b>Sequence</b> | <b>Accession #</b> | <b>Name of the protein</b>                        |
|---------------|-------------|-----------------|--------------------|---------------------------------------------------|
| 1083          | PPPY        | LVTIPPPYSNQG    | XP_497323          | heat-shock protein (HSP27)                        |
| 1084          | PPPY        | CARDPPPYYYDS    | CAC14123           | Ig heavy chain variable region                    |
| 1085          | PPPY        | TSWTPPPYFNES    | NP_055181          | guanine nucleotide binding protein-like 3         |
| 1086          | PPPY        | VSFPPPPYLARS    | BAA21572           | KIAA0346 protein                                  |
| 1087          | PPPY        | YFRSPPPYDQQM    | NP_060958          | T-box 4                                           |
| 1088          | PPPY        | VQYIPPPYGSPE    | BAB71025           | unnamed protein                                   |
| 1089          | PPPY        | ANSTPPPYERTR    | BAD92244           | RNA binding motif protein 14                      |
| 1090          | PPPY        | SSTLPPPYLLEA    | NP_055058          | ADAM metalloproteinase with thrombospondin type 1 |
| 1091          | PPPY        | SATLPPPYQLIN    | AA40964            | unknown protein                                   |
| 1092          | PPPY        | GSTIPPPYISSQ    | BAD92194           | suppression of tumorigenicity variant             |
| 1093          | PPPY        | GNSVPPPYLLAG    | BAC05726           | seven transmembrane helix receptor                |
| 1094          | PPPY        | SNSFPPPYHTAS    | CAH71004           | unc-13 homolog B                                  |
| 1095          | PPPY        | SNSIPPPYYTTS    | XP_038604          | unc-13 homolog a                                  |
| 1096          | PPPY        | GPCLPPPYVRTA    | AAH33491           | LOC161931 protein                                 |
| 1097          | PPPY        | GALLPPPYRVAD    | CAI12651           | zinc finger, A20 domain containing 1              |
| 1098          | PPPY        | SLSSPPPYSDKL    | BAC85836           | unnamed protein                                   |
| 1099          | PPPY        | SLGMPPPYAAHL    | Q8TEK3             | histone-lysine N-methyltransferase                |
| 1100          | PPPY        | VETCPPPYYHFQ    | AAH47591           | INSR protein                                      |
| 1101          | PPPY        | LYGCPPPYHTFE    | AAX53752           | cytochrome c oxidase subunit I                    |
| 1102          | PPPY        | LYGCPPPYHTFK    | AAP48038           | cytochrome c oxidase subunit I                    |
| 1103          | PPPY        | LHGCPPPYHTFE    | AAY99892           | cytochrome c oxidase subunit I                    |
| 1104          | PPPY        | LHGCPPPYHTFK    | AAY99866           | cytochrome c oxidase subunit I                    |
| 1105          | PPPY        | NVHLPPPYPLKE    | AAH69143           | tryptase delta 1                                  |
| 1106          | PPPY        | QQGLPPPYPLSQ    | CAH72026           | GLIS family zinc finger 1                         |
| 1107          | PPPY        | GEPLPPPYSLRE    | AAK61269           | HS transmembrane tryptase                         |
| 1108          | PPPY        | GTPLPPPYNLRE    | NP_899235          | testis serine protease 1                          |
| 1109          | PPPY        | DELQPPPYQDDS    | CAI17884           | synaptotagmin XIV                                 |
| 1110          | PPPY        | ACFSPPPYEEIY    | AAH19346           | hypothetical protein                              |
| 1111          | PPPY        | YREVPPPYDMKA    | AAL68925           | p53-associated cellular protein PACT              |
| 1112          | PPPY        | GQHGPPPYGDSR    | CAI95769           | DATF1                                             |
| 1113          | PPPY        | SRREPPPYGYRK    | AAH65286           | SNW1 protein                                      |
| 1114          | PPPY        | TRNSPPPYGFHL    | CAC21658           | hypothetical protein                              |
| 1115          | PPPY        | NDKKPPPYKHIK    | CAH56331           | hypothetical protein                              |
| 1116          | PPPY        | NSRKPPPYKHIK    | CAC28351           | putative Chromatin modulator                      |
| 1117          | PPPY        | SERKPPPYKHIK    | AAH94825           | unknown protein                                   |
| 1118          | PPPY        | ARARPPPYTGVM    | XP_370636          | similar to RIKEN cDNA 2610209a20                  |
| 1119          | PPPY        | GRKYPPPYKHFW    | CAH71283           | ubiquitin associated protein 2-like               |
| 1120          | PPPY        | ARGNPPPYDDIG    | P01824             | HV2F_HUMAN Ig heavy chain V-II region WaH         |
| 1121          | PPPY        | ARGIPPPYDFW     | CAC15816           | Ig heavy chain variable region                    |
| 1122          | PPPY        | SIFLPPPYPHLL    | NP_997336          | hypothetical protein                              |
| 1123          | PPPY        | FDGIPPPYDKKK    | AAQ13495           | FWP004                                            |
| 1124          | PPPY        | FDGIPPPYDKKK    | XP_497335          | similar to ribosomal protein L13a                 |
| 1125          | PPPY        | FDGTPPPYDKKK    | XP_377896          | similar to ribosomal protein L13a                 |
| 1126          | PPPY        | SDGIPPPYDKKK    | CAH73036           | unknown protein                                   |
| 1127          | PPPY        | SDGIPPPYDEKN    | XP_370668          | similar to ribosomal protein L13a                 |
| 1128          | PPPY        | EPENPPPYEEAM    | AAM64244           | RNT4                                              |

| <b>SPOT #</b> | <b>PPxY</b> | <b>Sequence</b> | <b>Accession #</b> | <b>Name of the protein</b>                          |
|---------------|-------------|-----------------|--------------------|-----------------------------------------------------|
| 1129          | PPPY        | WFSTPPPYKIHN    | AAH28088           | KIAA2010 protein                                    |
| 1130          | PPPY        | FLSQPPPYQTHQ    | XP_043653          | brain expressed X-linked-like 1                     |
| 1131          | PPPY        | QHHTPPPYYSRP    | NP_699202          | PDZ domain containing ring finger 1                 |
| 1132          | PPPY        | HGGSPPPYNQRP    | XP_378398          | hypothetical protein                                |
| 1133          | PPPY        | DTEAPPPYSPIG    | BAD92988           | Rho GTPase activating protein 5 variant             |
| 1134          | PPPY        | TDSSPPPYSSIT    | CAH73356           | Nedd4 family interacting protein 2                  |
| 1135          | PPPY        | ALGEPPPYGAAP    | NP_004545          | cytoplasmic nuclear factor of activated T-cells     |
| 1136          | PPPY        | TVLPPPPYRHRN    | BAD92934           | v-erb-A oncogene homolog 4                          |
| 1137          | PPPY        | EKAGPPPYIKPV    | NP_057597          | intestinal cell kinase                              |
| 1138          | PPPY        | ERAGPPPYIKPV    | AAF37278           | intestinal cell kinase                              |
| 1139          | PPPY        | AEQSPPPYSP      | NP_005502          | melan-A                                             |
| 1140          | PPPY        | GSGQPPPYDHLF    | NP_000359          | tuberous sclerosis 1 protein isoform 1              |
| 1141          | PPPY        | EGLWPPPYRPRR    | CAH73818           | patched homolog (Drosophila)                        |
| 1142          | PPPY        | YDLPPPPYSSDT    | AAH42754           | unknown protein                                     |
| 1143          | PPPY        | HDAPPPPYTSLR    | AAH26032           | PRRG2 protein                                       |
| 1144          | PPPY        | FHDPPPPYTAYK    | AAH40500           | DGCR2 protein                                       |
| 1145          | PPPY        | GQYSPPPYSEYP    | BAD96352           | hypothetical protein MGC8721 variant                |
| 1146          | PPPY        | GCIEMPPPYGNNS   | NP_005413          | tectorin alpha precursor                            |
| 1147          | PPPY        | RWDRPPPYVAPP    | NP_055901          | dendrin                                             |
| 1148          | PPPY        | RWDRPPPYVAPP    | BAA34469           | KIA0749 protein                                     |
| 1149          | PPPY        | EFVRPPPYHPKQ    | NP_115867          | mitochondrial ribosomal protein L38                 |
| 1150          | PPPY        | PRCSPPPYHPVQ    | BAC03745           | unnamed protein                                     |
| 1151          | PPPY        | SASTPPPYNPSI    | BAC04944           | unnamed protein                                     |
| 1152          | PPPY        | SASAPPPYNLFI    | P63118             | provirus ancestral Gag polyprotein                  |
| 1153          | PPPY        | AVWQPPPYGATK    | AAH34477           | ENTPD4 protein                                      |
| 1154          | PPPY        | ASDPPPPYSDFH    | NP_115558          | hypothetical protein                                |
| 1155          | PPPY        | SWETPPPYPENG    | CAI56714           | hypothetical protein                                |
| 1156          | PPPY        | DQEPPPPYQEQV    | NP_055187          | ring finger protein 11                              |
| 1157          | PPPY        | GAGSPPPYRRRK    | AAH33242           | methyl-CpG binding domain protein 1, isoform 3      |
| 1158          | PPPY        | LSAPPPPYSEVI    | AAQ88571           | SQAW5801                                            |
| 1159          | PPPY        | MAEPPPPYSEVL    | NP_085044          | proline rich 7 (synaptic)                           |
| 1160          | PPPY        | PQERPPPYLAVP    | AAC14346           | Notch3                                              |
| 1161          | PPPY        | ADIGPPPYEPPG    | CAB66633           | hypothetical protein                                |
| 1162          | PPPY        | KRPPPPPYNCRY    | BAB13377           | KIAA1551 protein                                    |
| 1163          | PPPY        | FYPVPPPYSVAT    | CAH73356           | Nedd4 family interacting protein 2                  |
| 1164          | PPPY        | ELDQPPPYSTVV    | BAC11382           | unnamed protein                                     |
| 1165          | PPPY        | PTDAPPPYSLTD    | XP_375359          | similar to Nedd4-binding protein BEAN               |
| 1166          | PPPY        | GPGSPPPYKMIQ    | AAH71557           | PTK7 protein tyrosine kinase 7, isoform A precursor |
| 1167          | PPPY        | YPADPPPYIDGI    | AAH56202           | calpain 7                                           |
| 1168          | PPPY        | PGQGPPPYVFMV    | NP_065804          | cask-interacting protein 2                          |
| 1169          | PPPY        | DGEEPPPYQGPC    | NP_954640          | prostate androgen-induced protein isoform c         |
| 1170          | PPPY        | YSPQPPPYHELK    | NP_004413          | dishevelled 2                                       |
| 1171          | PPPY        | AGDAPPPYSSIS    | BAC11670           | unnamed protein                                     |
| 1172          | PPPY        | GGPAPPPYSEV     | NP_006753          | lysosomal multispinning membrane protein 5          |
| 1173          | PPPY        | YPPAPPPYSETD    | AAB51178           | liver-specific bHLH-Zip transcription factor        |
| 1174          | PPPY        | SDPSPPPYPNVL    | BAD92716           | VARS2L protein variant                              |

| <b>SPOT #</b> | <b>PPxY</b> | <b>Sequence</b> | <b>Accession #</b> | <b>Name of the protein</b>                    |
|---------------|-------------|-----------------|--------------------|-----------------------------------------------|
| 1175          | PPPY        | QRPQPPPYWRGP    | XP_374769          | similar to USP6NL protein                     |
| 1176          | PPPY        | LPPEPPPYWSGI    | AAH51715           | Neurologin 3                                  |
| 1177          | PPPY        | GYTPPPYPFTP     | NP_940900          | hypothetical protein LOC341032                |
| 1178          | PPPY        | ALPPPPPYVILE    | AAG53596           | nucleolar TGF-beta1 target protein            |
| 1179          | PPPY        | RAELPPPYTAIA    | NP_061180          | transmembrane protein 55a                     |
| 1180          | PPPY        | EAGPPPPYHDAL    | XP_496810          | similar to expressed sequence aW125688        |
| 1181          | PPPY        | FPRAPPPYPTHH    | XP_040592          | zinc finger protein 469                       |
| 1182          | PPPY        | PHTSPPPYNAPQ    | AAH63046           | NG5 protein                                   |
| 1183          | PPPY        | TRHPPPPYNTAK    | XP_498916          | hypothetical protein                          |
| 1184          | PPPY        | EKEPPPPYLPA     | AAH03158           | lysosomal-associated protein                  |
| 1185          | PPPY        | AKEPPPPYVSA     | CAB66876           | hypothetical protein                          |
| 1186          | PPPY        | SREPPPPYVTPA    | NP_073210          | DiGeorge syndrome critical region protein     |
| 1187          | PPPY        | PGMNPPPYSQFL    | AAP97433           | fibroblast growth factor 23                   |
| 1188          | PPPY        | CADLPPPYSPTP    | BAD97296           | cysteine and tyrosine-rich 1 protein          |
| 1189          | PPPY        | CNTPPPPYEQVV    | CAB66545           | hypothetical protein                          |
| 1190          | PPPY        | CGDPPPPYEPHC    | CAH70837           | tumor necrosis factor receptor superfamily    |
| 1191          | PPPY        | PMKLPPPYKALT    | CAH70418           | InaD-like protein (INaDL)                     |
| 1192          | PPPY        | TPPPPYTVG       | 1K5R               | B Chain B, Yap65 WW Domain Mutant             |
| 1193          | PPPY        | APLSPPPYLPHR    | XP_048070          | zinc finger protein 292                       |
| 1194          | PPPY        | LPEPPPPYEFSC    | AAH53323           | Nedd4 binding protein 3                       |
| 1195          | PPPY        | SDGPPPPYEQYF    | AAP84255           | T-cell receptor beta chain                    |
| 1196          | PPPY        | LSWQPPPYTPTP    | CAI42656           | upstream regulatory element BP-1 (UREB1)      |
| 1197          | PPPY        | LSWQPPPYTPTL    | AAV90838           | ARF-binding protein 1                         |
| 1198          | PPPY        | WVPGPPPYLPRQ    | NP_443180          | sorting nexin 26                              |
| 1199          | PPPY        | PTMTPPPYLPGP    | AAU12169           | FOXI1 protein                                 |
| 1200          | PPPY        | DSPPPPPYSRGI    | CAD97884           | hypothetical protein                          |
| 1201          | PPPY        | WREPPPPYPCIE    | AAH08781           | hypothetical protein                          |
| 1202          | PPPY        | NFPAPPPYPGES    | CAB51072           | hypothetical protein                          |
| 1203          | PPPY        | DFPAPPPYSAVT    | NP_597734          | synaptopodin 2                                |
| 1204          | PPPY        | HTYLPPPYPGSS    | CAI13532           | RUNX2                                         |
| 1205          | PPPY        | HTYLPPPYPGAP    | NP_001026850       | runt-related transcription factor 3           |
| 1206          | PPPY        | HTYLPPPYPGEF    | 1B8X               | GST Transcription Factor aml-1                |
| 1207          | PPPY        | PAALPPPYPGSS    | P63117             | provirus ancestral Gag polyprotein            |
| 1208          | PPPY        | VVAPPPPYMHPW    | AAG44485           | HT027                                         |
| 1209          | PPPY        | SNTAPPPYSPSP    | AAH52341           | KIAA0280 protein                              |
| 1210          | PPPY        | SHSLPPPYGPGY    | NP_036522          | submaxillary gland androgen regulated protein |
| 1211          | PPPY        | IPPCPPPYEFCG    | AAG53084           | POU 5 domain protein                          |
| 1212          | PPPY        | NPSAPPPYEDRN    | NP_071435          | PP1201 protein                                |
| 1213          | PPPY        | QPQPPPPYEDRN    | AAH26693           | PP1201 protein                                |
| 1214          | PPPY        | RYSPPPPYSSHS    | CAH73818           | patched homolog                               |
| 1215          | PPPY        | PFEKPPPYSP      | CAI40801           | novel protein                                 |
| 1216          | PPPY        | PGEKPPPYAP      | NP_872420          | family with sequence similarity 70            |
| 1217          | PPPY        | PGEDPPPYSPLT    | AAH02867           | hypothetical protein                          |
| 1218          | PPPY        | PLESPPPYRPDE    | DAA01837           | TPA: tight junction protein occludin TM4      |
| 1219          | PPPY        | QNVPPPPYQDSP    | AAH45626           | PKNOX2 protein                                |
| 1220          | PPPY        | RALPPPPYTTFP    | AAP31500           | gametogenetin protein 1A                      |

| <b>SPOT #</b> | <b>PPxY</b> | <b>Sequence</b> | <b>Accession #</b> | <b>Name of the protein</b>                       |
|---------------|-------------|-----------------|--------------------|--------------------------------------------------|
| 1221          | PPPY        | SPPGPPPYGKRA    | BAD92582           | atrophin-1 variant                               |
| 1222          | PPPY        | APSPPPYPVTP     | AAL55786           | AF289602_1 unknown                               |
| 1223          | PPPY        | SPQSPPPYPSVP    | AAF74213           | AF156961_1 gag                                   |
| 1224          | PPPY        | YLPFPPPYGPQG    | CAI18313           | HLA-B associated transcript 2                    |
| 1225          | PPPY        | HDPYPPPYGPHY    | XP_374437          | hypothetical protein XP_374437                   |
| 1226          | PPPY        | GPREPPPYQEPR    | CAA66871           | discoidin receptor tyrosine kinase               |
| 1227          | PPPY        | EPGAPPPYSAPA    | AAH35342           | similar to Kruppel-like factor 2 (lung)          |
| 1228          | PPPY        | SPPAPPPYKAPR    | CAB45385           | trithorax homologue 2                            |
| 1229          | PPPY        | PGRIPPPYSCTP    | AAH94707           | unknown protein                                  |
| 1230          | PPPY        | PTEPPPPYSFRP    | AAQ88571           | SQAW5801                                         |
| 1231          | PPPY        | PGTPPPPYTVAP    | NP_036609          | WW domain binding protein 1                      |
| 1232          | PPPY        | YTLPPPPYPHLE    | AAH68562           | PRDM4 protein                                    |
| 1233          | PPPY        | LCIQPPPYPGNI    | NP_003805          | ADAM metallopeptidase domain 20                  |
| 1234          | PPPY        | YPAGPPPYGHDH    | BAD97296           | cysteine and tyrosine-rich 1 protein             |
| 1235          | PPPY        | SYGPPPYGHDH     | NP_443186          | cysteine and tyrosine-rich 1 protein             |
| 1236          | PPPY        | EKCVPPPYPGPV    | NP_057682          | DHHC1 protein                                    |
| 1237          | PPPY        | VRGPPPPYQMTP    | NP_004317          | B-cell CLL/lymphoma 9                            |
| 1238          | PPPY        | VRGPPPPYHSKP    | AAQ62697           | BCL9-2                                           |
| 1239          | PPPY        | PHQQPPPYPLMH    | AAH50564           | SWI/SNF-related regulator of chromatin           |
| 1240          | PPPY        | KTHPPPPYSPAP    | BAC87582           | unnamed protein                                  |
| 1241          | PPPY        | SSEPPPPYPGGP    | CAB66633           | hypothetical protein                             |
| 1242          | PPPY        | VCTPPPPYPPSW    | AAH50540           | GALNAC4S-6ST protein                             |
| 1243          | PPPY        | PPPYPTDC        | 1RG6               | C-Terminal Domain Of P63                         |
| 1244          | PPPY        | HCTPPPPYPTDC    | AAG45611           | DN p63 beta                                      |
| 1245          | PPPY        | QCTPPPPYPTDC    | CAA76562           | KET protein                                      |
| 1246          | PPPY        | HCTPPPPYHADP    | NP_005418          | tumor protein p73                                |
| 1247          | PPPY        | VTPFPPPYPTTEC   | XP_371320          | FLJ00193 protein                                 |
| 1248          | PPPY        | RRCPPPPYPKHL    | BAD93134           | LATS, large tumor suppressor, homolog 2          |
| 1249          | PPPY        | YQGPPPPYPKHL    | BAD92663           | LATS homolog 1                                   |
| 1250          | PPPY        | VPSPPPPYTTSH    | AAH12029           | unknown protein                                  |
| 1251          | PPPY        | GPPQPPPYSI      | BAB14013           | unnamed protein                                  |
| 1252          | PPPY        | QDSPPPPYDTYP    | CAI39866           | connector enhancer of kinase suppressor of Ras 2 |
| 1253          | PPPY        | LESPPPPYSRYP    | NP_005895          | MAD, mothers against decapentaplegic 7           |
| 1254          | PPPY        | PLDPPPPYEAVV    | CAI15446           | unknown protein                                  |
| 1255          | PPPY        | PDDPPPPYEASI    | AAH40500           | DGCR2 protein                                    |
| 1256          | PPPY        | PAELPPPYEAVV    | O60320             | Y574 hypothetical protein KIAA0574               |
| 1257          | PPPY        | PTGDPPPYPEIA    | NP_064630          | tubby like protein 4                             |
| 1258          | PPPY        | PLGSPPPYEEIV    | AAQ88970           | SRSR846                                          |
| 1259          | PPPY        | LGHWPPPYVPR     | CAI41685           | unknown protein                                  |
| 1260          | PPPY        | PYRSPPPYVPP     | AAH12740           | Dystroglycan 1                                   |
| 1261          | PPPY        | PMQYPPPYPAQP    | CAH10718           | hypothetical protein                             |
| 1262          | PPPY        | FTRPPPPYPGNI    | AAS00364           | unknown protein                                  |
| 1263          | PPPY        | KINPPPPYPGTI    | NP_064630          | tubby like protein 4                             |
| 1264          | PPPY        | QRSPPPPYPGNA    | BAD97296           | cysteine and tyrosine-rich 1 protein             |
| 1265          | PPPY        | SVSPPPPYPGHT    | NP_076986          | proline rich Gla (G-carboxyglutamic acid)        |
| 1266          | PPPY        | NRQPPPPYPLTA    | BAD92663           | LATS homolog 1                                   |

| <b>SPOT #</b> | <b>PPxY</b> | <b>Sequence</b> | <b>Accession #</b> | <b>Name of the protein</b>                      |
|---------------|-------------|-----------------|--------------------|-------------------------------------------------|
| 1267          | PPPY        | GPPRPPPYGYQR    | BAD97042           | splicing factor 3b                              |
| 1268          | PPPY        | QKSPPPPYSRLS    | AAC50792           | Smad6                                           |
| 1269          | PPPY        | PESPPPPYSRLS    | AAH12986           | MAD, mothers against decapentaplegic 6          |
| 1270          | PPPY        | FPLPPPPYELPA    | NP_006154          | nuclear factor (erythroid-derived 2), 45kDa     |
| 1271          | PPPY        | GAGPPPPYPTPS    | NP_443180          | sorting nexin 26                                |
| 1272          | PPPY        | AEYQPPPYFPPP    | NP_003213          | transcription factor AP-2 gamma                 |
| 1273          | PPPY        | CPLPPPPYQMQS    | CAH56330           | hypothetical protein                            |
| 1274          | PPPY        | CPPPPPPYQMQS    | AAH33831           | MUC5AC protein                                  |
| 1275          | PPPY        | APPPPPPYRMHG    | NP_573571          | WIRE protein                                    |
| 1276          | PPPY        | PPGPPPPYHAHA    | CAH70655           | unknown protein                                 |
| 1277          | PPPY        | PQGPPPPYHAHA    | NP_689842          | GLIS family zinc finger 3                       |
| 1278          | PPPY        | NQENPPPYPGPG    | AAH23982           | putative nuclear protein ORF1-FL49              |
| 1279          | PPPY        | DKRPPPPYPGPG    | NP_038286          | Rho GTPase activating protein 6 isoform 1       |
| 1280          | PPPY        | GQQAPPPYPGPH    | NP_851385          | polybromo 1 isoform 4                           |
| 1281          | PPPY        | RQQAPPPYPGPH    | NP_060783          | polybromo 1 isoform 2                           |
| 1282          | PPPY        | PPSPPPPYDSRL    | NP_067048          | basic proline-rich protein                      |
| 1283          | PPPY        | PPTPPPPYSAFQ    | CAI52496           | chromosome 10 open reading frame 26             |
| 1284          | PPPY        | PHPQPPPYGHCV    | CAD97984           | hypothetical protein                            |
| 1285          | PPPY        | SGPQPPPYGHCV    | CAE46002           | hypothetical protein                            |
| 1286          | PPPY        | PHPHPPPYPHFT    | NP_055464          | scaffold attachment factor B2                   |
| 1287          | PPPY        | AAPPPPPYPYLK    | NP_056194          | brain protein I3                                |
| 1288          | PPPY        | LGPYPPPYPPPA    | XP_498717          | hypothetical protein                            |
| 1289          | PPPY        | PSHPPPPYPFGS    | NP_054790          | nuclear receptor coactivator 6                  |
| 1290          | PPPY        | PPYPPPPYPSGE    | NP_005417          | tumor protein p53 binding protein, 2 isoform 2  |
| 1291          | PPPY        | QIPIPPPYHPSL    | CAH70194           | ring finger protein 38                          |
| 1292          | PPPY        | PPPPPPPYSGCA    | CAH18435           | hypothetical protein                            |
| 1293          | PPPY        | PPLPPPPYLPL     | CAH18488           | hypothetical protein                            |
| 1294          | PPPY        | PPVPPPPYYPPE    | CAI95093           | chromosome 1 open reading frame 2               |
| 1295          | PPPY        | PPLPPPPYYPPE    | O60320             | Y574 hypothetical protein KIAA0574              |
| 1296          | PPPY        | PPPPPPPYGRLL    | BAD92582           | atrophin-1 variant                              |
| 1297          | PPPY        | GPPPPPPYGRLL    | AAH51795           | atrophin-1                                      |
| 1298          | PPPY        | PVPPPPPYLASV    | CAI18313           | HLA-B associated transcript 2                   |
| 1299          | PPPY        | PPPPPPPYYPSF    | CAD39147           | hypothetical protein                            |
| 1300          | PPPY        | PPPPPPPYGPGR    | AAH94707           | unknown protein                                 |
| 1301          | PPPY        | PPSPPPPYGPGR    | NP_036522          | androgen regulated protein 3                    |
| 1302          | PPPY        | PPPHPPPYGPGR    | NP_036522          | androgen regulated protein 3                    |
| 1303          | PPPY        | PPPPPPPYLASL    | NP_055527          | hypothetical protein                            |
| 1304          | PPPY        | KLPPPPPYGRLL    | CAA80468           | unnamed protein                                 |
| 1305          | PPPY        | SQPPPPPYYPPE    | CAH56417           | hypothetical protein                            |
| 1306          | PPPY        | PQPPPPPYGHKR    | AAH04940           | similar to RIKEN cDNA 2210403L10                |
| 1307          | PPPY        | FPPPPPPYFPES    | AAH35310           | proline-rich protein PRP2                       |
| 1308          | PPPY        | LPPPPPPYNHPH    | BAA83062           | KIAA1110 protein                                |
| 1309          | PPPY        | LPPPPPPYHPPA    | NP_001002860       | BTB (POZ) domain containing 7                   |
| 1310          | PPPY        | LFRPPPPYPRPR    | NP_005392          | protein tyrosine phosphatase, non-receptor type |
| 1311          | PPPY        | VYRPPPPYPPPR    | CAD19000           | protein tyrosine phosphatase, non-receptor type |
| 1312          | PPPY        | VLPPPPPYPPPD    | AAH45771           | COBL protein                                    |

| <b>SPOT #</b> | <b>PPxY</b> | <b>Sequence</b> | <b>Accession #</b> | <b>Name of the protein</b>        |
|---------------|-------------|-----------------|--------------------|-----------------------------------|
| 1313          | PPPY        | QVSPPPYPAPQ     | AAH74731           | TORC3 protein                     |
| 1314          | PPPY        | RISPPPPYPPPK    | BAA74877           | KIAA0854 protein                  |
| 1315          | PPPY        | VQPPPPYPGPM     | AAP97175           | WW-domain binding protein 2       |
| 1316          | PPPY        | IAPPPPYTPNP     | AAH53566           | C13orf23 protein                  |
| 1317          | PPPY        | LAPPPPYRQPP     | NP_573571          | WIRE protein                      |
| 1318          | PPPY        | PPSLPPYPQRH     | BAC86318           | unnamed protein                   |
| 1319          | PPPY        | PPYFPPYPQPP     | CAI23520           | transcription factor AP-2 epsilon |
| 1320          | PPPY        | PPYFPPYQQLA     | NP_003213          | transcription factor AP-2 gamma   |
| 1321          | PPPY        | PPYFPPYQPIY     | CAI20065           | TFAP2a                            |
| 1322          | PPPY        | PPYFPPYQPLP     | NP_003212          | transcription factor AP-2 beta    |
| 1323          | PPPY        | PGPAPPPYLPPQ    | CAI42091           | IQ motif and Sec7 domain 2        |
| 1324          | PPPY        | PSPAPPPYTPPT    | AAH46366           | unknown protein                   |
| 1325          | PPPY        | NPAAPPPYMPPQ    | AAH61908           | TMEM58 protein                    |
| 1326          | PPQY        | RILQPPQYFWEE    | AAH19330           | PODXL2 protein                    |
| 1327          | PPQY        | SLLQPPQYRIYQ    | CAH10501           | hypothetical protein              |
| 1328          | PPQY        | QIYGPPQYNIQY    | NP_001006600       | ERBB2 interacting                 |
| 1329          | PPQY        | NYYEPPQYTRIC    | XP_498385          | pseudoautosomal gene XE7          |
| 1330          | PPQY        | GARSPPQYCGTK    | AAH29289           | TBR1 protein                      |
| 1331          | PPQY        | TLVLPPQYVDDV    | CAI17284           | cofactor for Sp1                  |
| 1332          | PPQY        | TRVEPPQYMIDL    | NP_057288          | growth differentiation factor     |
| 1333          | PPQY        | VIIAPPQYVTTS    | CAD91164           | hypothetical protein              |
| 1334          | PPQY        | VAGLPPQYGLYS    | NP_775897          | solute carrier 26                 |
| 1335          | PPQY        | GCSFPPQYSALQ    | XP_373039          | similar to ring finger            |
| 1336          | PPQY        | GFSLPPQYSGLD    | AAI00987           | TRIM60 protein                    |
| 1337          | PPQY        | CASAPPQYSLLK    | A49364             | 59 protein, brain                 |
| 1338          | PPQY        | ILHIPPQYLHLV    | AAH69501           | unknown protein                   |
| 1339          | PPQY        | INDVPPQYFQHL    | NP_940999          | SEC24-related protein             |
| 1340          | PPQY        | LGKLPPQYALEL    | NP_058132          | oligoadenyl synthetase            |
| 1341          | PPQY        | YPCCPPQYCLNQ    | NP_950247          | testis                            |
| 1342          | PPQY        | APCCPPQYNVVQ    | AAP12545           | unknown protein                   |
| 1343          | PPQY        | ESNYPPQYLILK    | NP_037387          | muskelin 1                        |
| 1344          | PPQY        | PDTVPPQYGALR    | AAH40929           | HERC1 protein                     |
| 1345          | PPQY        | QGEAPPQYLTTD    | CAI95134           | transforming coil-coil            |
| 1346          | PPQY        | FEPLPPQYFIRV    | AAH65924           | unknown                           |
| 1347          | PPQY        | YFHWPPQYFFDS    | AAQ05623           | Ig heavy chain                    |
| 1348          | PPQY        | ATGKPPQYIAVH    | CAG46452           | MIF                               |
| 1349          | PPQY        | AMSSPPQYYTIY    | BAB71025           | unnamed protein                   |
| 1350          | PPQY        | GSPLPPQYATQF    | XP_172801          | KIAA1210 protein                  |
| 1351          | PPQY        | GTPEPPQYKSPE    | XP_498299          | flagelliform silk protein         |
| 1352          | PPQY        | TGLGPPQYVAQV    | NP_001005415       | membrane-associated ring finger   |
| 1353          | PPQY        | LDHQPPQYKLDP    | NP_003068          | SWI/SNF-related                   |
| 1354          | PPQY        | CELWPPQYPSKG    | XP_497824          | similar to CBG24246               |
| 1355          | PPQY        | EEELPPQYFSSE    | CAI95315           | novel protein                     |
| 1356          | PPQY        | ASTFPPQYLSSE    | CAH10382           | hypothetical protein              |
| 1357          | PPQY        | ELEIPPQYQAGG    | CAI40776           | KIAA0690 protein                  |
| 1358          | PPQY        | FSCKPPQYGQLE    | CAD38989           | hypothetical protein              |

| <b>SPOT #</b> | <b>PPxY</b> | <b>Sequence</b> | <b>Accession #</b> | <b>Name of the protein</b>          |
|---------------|-------------|-----------------|--------------------|-------------------------------------|
| 1359          | PPQY        | RSCTPPQYGGRP    | CAI21673           | BAI3                                |
| 1360          | PPQY        | AFEAPPQYVLPT    | AAH03158           | Lysosomal-associated                |
| 1361          | PPQY        | TKQAPPQYTFIG    | NP_258257          | hypothetical protein                |
| 1362          | PPQY        | HEESPPQYQTSY    | NP_000258          | neurofibromin                       |
| 1363          | PPQY        | AQALPPQYQSII    | CAI15778           | novel protein                       |
| 1364          | PPQY        | SQSFPQYQEAV     | AAF36141           | HSPC221                             |
| 1365          | PPQY        | QHQLPPQYQKIL    | BAD92609           | mitogen-activated kinase            |
| 1366          | PPQY        | IAAVPPQYRKVL    | CAH10573           | hypothetical protein                |
| 1367          | PPQY        | HQPQPPQYAPAP    | CAG46647           | GRAP2                               |
| 1368          | PPQY        | PVGYPQYPTA      | AAH17901           | PLSCR1                              |
| 1369          | PPQY        | PLTPPPQYDEVQ    | NP_060492          | transmembrane protein 51            |
| 1370          | PPQY        | DITHPPQYGQIQ    | XP_498003          | proteoglycan NG2                    |
| 1371          | PPQY        | KPGSPPQYLLS     | AAC15222           | Ig lambda light chain               |
| 1372          | PPQY        | KPGSPPQYLLRY    | BAA19996           | V4-2                                |
| 1373          | PPQY        | KPGSPPQYLLKY    | CAB46479           | Ig light chain variable             |
| 1374          | PPQY        | KPGSPPQYLLTY    | CAB46466           | Ig light chain variable             |
| 1375          | PPQY        | KPGSPPQYLLSY    | AAC16858           | Ig lambda light chain               |
| 1376          | PPQY        | KPGSPPQYLLWY    | CAE18301           | Ig lambda-1 variable                |
| 1377          | PPQY        | KAGSPPQYLLRY    | AAC16778           | Ig lambda light chain               |
| 1378          | PPQY        | KPVSPQYLLRY     | CAE18225           | Ig lambda-1 variable                |
| 1379          | PPQY        | SRGPPPQYPHVV    | NP_057285          | angiomin like 2                     |
| 1380          | PPQY        | PQRPPPQYPLLI    | AAH23605           | hypothetical protein                |
| 1381          | PPQY        | QRRDPPQYPVVP    | CAA39461           | eosinophil protein                  |
| 1382          | PPQY        | PNFEPQYPIIP     | CAG33200           | CPSF5                               |
| 1383          | PPQY        | RPADPPQYQEVV    | AAH32059           | HSPA5BP1                            |
| 1384          | PPQY        | RGRNPPQYQRSP    | CAH73693           | unknown protein                     |
| 1385          | PPQY        | DVFRPPQYPMIL    | BAC86581           | unnamed protein                     |
| 1386          | PPQY        | PAVVPPQYYGVP    | NP_056132          | pumilio homolog 2                   |
| 1387          | PPQY        | QQQMPPQYGQQG    | AAN70985           | BAF250b                             |
| 1388          | PPQY        | FWLMPPQYGQQG    | CAI40666           | unknown protein                     |
| 1389          | PPQY        | PQPSPPQYLQSG    | NP_005260          | glioma-associated oncogene          |
| 1390          | PPQY        | PRLSPPQYSHQV    | NP_612466          | forkhead box P4                     |
| 1391          | PPQY        | TSQQPPQYSHQT    | AAI05951           | unknown                             |
| 1392          | PPQY        | HKQEPPQYSHTS    | NP_000449          | transcription factor 2              |
| 1393          | PPQY        | ADRPPPQYIHPN    | AAH68562           | PRDM4 protein                       |
| 1394          | PPQY        | LTRPPPQYQDPT    | BAD92372           | mastermind-like 1                   |
| 1395          | PPQY        | SDKAPPQYREPS    | AAH38860           | ProSAPiP1 protein                   |
| 1396          | PPQY        | NFVSPQYPDYG     | CAH70633           | caudal homeo box                    |
| 1397          | PPQY        | PPPAPPQYPDFS    | AAF61234           | CDX1 homeobox                       |
| 1398          | PPQY        | PPRLPPQYPGDS    | NP_061852          | WNK lysine deficient pk2            |
| 1399          | PPQY        | PPVPPPQYFSPA    | CAI12344           | protein kinase, lysine              |
| 1400          | PPQY        | LPPVPPQYQVPG    | AAS45401           | ARC/mediator                        |
| 1401          | PPQY        | LPPIPPQYQVPG    | AAM20739           | p78                                 |
| 1402          | PPRY        | DRGKPPRYGTAL    | NP_002578          | protocadherin 1 isoform 1 precursor |
| 1403          | PPRY        | NLIAPPRYVMTT    | NP_004085          | translation initiation factor 2     |
| 1404          | PPRY        | VAQLPPRYEVTI    | XP_496208          | similar to KIAA0563 gene product    |

| <b>SPOT #</b> | <b>PPxY</b> | <b>Sequence</b> | <b>Accession #</b> | <b>Name of the protein</b>                       |
|---------------|-------------|-----------------|--------------------|--------------------------------------------------|
| 1405          | PPRY        | ILLMPPRYGIPF    | AAH17700           | ZBTB32 protein                                   |
| 1406          | PPRY        | LLYRPPRYQIAI    | AAH17037           | ICMT protein                                     |
| 1407          | PPRY        | GGGAPPRYATLE    | AAH52266           | FZD2 protein                                     |
| 1408          | PPRY        | KTKDPPRYEEAI    | NP_054767          | megakaryoblastic leukemia 2 protein              |
| 1409          | PPRY        | SSHSPPRYTDQG    | AAF29004           | HSPC326                                          |
| 1410          | PPRY        | SHGLPPRYIMQA    | AAS82571           | P-Rex2                                           |
| 1411          | PPRY        | VITSPPRYGQIE    | CAH71827           | unknown protein                                  |
| 1412          | PPRY        | ALLVPPRYARSE    | NP_001005242       | plakophilin 2 isoform 2a                         |
| 1413          | PPRY        | FGCIPPRYKLCV    | AAH67435           | cytochrome P450, family 2                        |
| 1414          | PPRY        | AEQWPPRYWG      | AAC70869           | Ig heavy chain variable region                   |
| 1415          | PPRY        | KIYEPPRYMSVN    | AAH53857           | DPH5 protein                                     |
| 1416          | PPRY        | PLRKPPRYSDLH    | BAC05426           | unnamed protein                                  |
| 1417          | PPRY        | LKAKPPRYVGLG    | BAC04931           | unnamed protein                                  |
| 1418          | PPRY        | ERSHPPRYRGIG    | CAA65633           | mitochondrial citrate transport protein          |
| 1419          | PPRY        | KEKRPPRYKGE     | CAH72311           | AU RNA binding protein                           |
| 1420          | PPRY        | GGAYPPRYFYFPF   | CAI42822           | STAU                                             |
| 1421          | PPRY        | TQLRPPRYIHKA    | XP_497281          | similar to tripartite motif-containing 48        |
| 1422          | PPRY        | TSWTPPRYVLSM    | BAD96318           | DEAD-box protein abstrakt variant                |
| 1423          | PPRY        | MPQDPPRYQDNR    | BAB21817           | KIAA1726 protein                                 |
| 1424          | PPRY        | ERITPPRYRADE    | NP_777596          | proprotein convertase subtilisin                 |
| 1425          | PPRY        | GFPGPPRYRSAA    | AAI05989           | unknown protein                                  |
| 1426          | PPRY        | FSDIPPRYPFQA    | XP_376567          | KIAA1856 protein                                 |
| 1427          | PPRY        | MARDPPRYLVIK    | AAA35979           | HER3 protein precursor                           |
| 1428          | PPRY        | HFGLPPRYQPDV    | AAH01627           | 2-hydroxyphytanoyl-Coa lyase                     |
| 1429          | PPRY        | SAINPPRYELIY    | AAH57784           | FLJ14803 protein                                 |
| 1430          | PPRY        | PFPQPPRYPLML    | NP_067063          | doublesex and mab-3 related transcription factor |
| 1431          | PPRY        | SARRPPRYLLSA    | NP_002400          | mannosyl aminyltransferase                       |
| 1432          | PPRY        | EVEEPPRYLLKF    | NP_000929          | DNA directed RNA Pol II polypeptide B            |
| 1433          | PPRY        | KPGNPPRYLLYY    | BAB15473           | unnamed protein                                  |
| 1434          | PPRY        | KPGSPPRYLLYY    | BAA20007           | V4-1                                             |
| 1435          | PPRY        | KPGSPPRYLLRY    | AAC16831           | Ig lambda light chain variable region            |
| 1436          | PPRY        | KPESPPRYLLSY    | BAA20014           | V4-3                                             |
| 1437          | PPRY        | LLIDPPRYIQDL    | NP_056507          | C3 and PZP-like protein                          |
| 1438          | PPRY        | LSILPPRYISNL    | BAC85730           | unnamed protein                                  |
| 1439          | PPRY        | WSSRPPRYLSGV    | EAL24109           | similar to Filamin C                             |
| 1440          | PPRY        | LDPEPPRYLQSL    | CAI13538           | Ras association (RalGDS/VaF-6) domain family 5   |
| 1441          | PPRY        | RSTKPPRYKCGI    | NP_055703          | osteoblast protein                               |
| 1442          | PPRY        | RSPIPPRYLCSL    | XP_373871          | hypothetical protein                             |
| 1443          | PPRY        | PSELPPRYEEKE    | AAH35310           | Proline-rich protein PRP2                        |
| 1444          | PPRY        | SEAGPPRYLGDR    | AAH67847           | SLAMF1 protein                                   |
| 1445          | PPRY        | RDLSPPRYDSL     | DAA05504           | TPA: centrosome protein Cep215                   |
| 1446          | PPRY        | KDESPPRYRPLV    | AAM81186           | gag protein                                      |
| 1447          | PPRY        | RFQEPPRYRDIC    | CAI46091           | hypothetical protein                             |
| 1448          | PPRY        | RELSPPRYKLCV    | CAI13007           | novel Tctex-1 family domain-containing protein   |
| 1449          | PPRY        | RFSHPPRYWPVL    | NP_620145          | phospholipase D family                           |
| 1450          | PPRY        | PELDPPRYKCTE    | CAB96538           | hypothetical protein                             |

| <b>SPOT #</b> | <b>PPxY</b> | <b>Sequence</b> | <b>Accession #</b> | <b>Name of the protein</b>                |
|---------------|-------------|-----------------|--------------------|-------------------------------------------|
| 1451          | PPRY        | RASSPPRYLQHD    | CAI20371           | unknown protein                           |
| 1452          | PPRY        | PENKPPRYLQND    | CAI17380           | myosin IIIA                               |
| 1453          | PPRY        | PEEKPPRYIADE    | AAY24324           | unknown                                   |
| 1454          | PPRY        | AVLCPPRYPKLA    | CAI17827           | chloride intracellular channel 1          |
| 1455          | PPRY        | QTLAPPRYPHLS    | NP_001280          | chloride intracellular channel 2          |
| 1456          | PPRY        | EKLAPPRYPKLG    | BAC03959           | unnamed protein                           |
| 1457          | PPRY        | SSLSPPRYEKLD    | CAB51072           | hypothetical protein                      |
| 1458          | PPRY        | ATGCPPRYECSA    | AAH68558           | LRRN6a protein                            |
| 1459          | PPRY        | CARDPPRYCSAG    | CAB43003           | anti-HCV E2 antibody, VH segment          |
| 1460          | PPRY        | AAGPPRYCSST     | AAS86050           | Ig heavy chain                            |
| 1461          | PPRY        | CATRPPRYSSGW    | AAB48613           | Ig heavy chain V-region                   |
| 1462          | PPRY        | VTVAPPRYLPHS    | BAB14733           | unnamed protein                           |
| 1463          | PPRY        | TGNSPPRYRLLM    | BAD92969           | replication protein A1, 70kDa variant     |
| 1464          | PPRY        | VPKVPPRYKEPT    | CAI46017           | hypothetical protein                      |
| 1465          | PPRY        | RGEVPPRYPRDV    | CAA26382           | unnamed protein                           |
| 1466          | PPRY        | PGSPPPRYQGPV    | AAT09000           | hypothetical protein                      |
| 1467          | PPRY        | TLTTPPRYPQKL    | CAH18291           | hypothetical protein                      |
| 1468          | PPRY        | RLWRPPRYPRKT    | AAH96706           | unknown protein                           |
| 1469          | PPRY        | GLAPPRYPGSL     | NP_006488          | hypermethylated in cancer 1               |
| 1470          | PPRY        | RFFFPPRY        | CAI17374           | novel protein (KIAA0460)                  |
| 1471          | PPRY        | YGSSPPRYTF      | AAQ21884           | Ig kappa chain variable region            |
| 1472          | PPRY        | YGSSPPRYSFG     | AAA17705           | Ig kappa chain VKIII-JK2                  |
| 1473          | PPRY        | RSNWPPRYTF      | AAQ22129           | Ig kappa chain variable region            |
| 1474          | PPRY        | YDNWPPRYSF      | AAQ22225           | Ig kappa chain variable region            |
| <b>1475</b>   | PPRY        | YNNWPPRYTFGQ    | 1YYM               | Q Chain Q, a Scorpion-Toxin Mimic Of Cd4  |
| 1476          | PPRY        | PAADPPRYTFAP    | AAH84575           | unknown protein                           |
| 1477          | PPRY        | SNSDPPRYKFPW    | XP_498392          | similar to melanoma antigen               |
| 1478          | PPRY        | PNSSPPRYEFLW    | NP_005453          | melanoma antigen family C, 1              |
| 1479          | PPRY        | PNSAPPRYEFLW    | AAI03894           | MAGEC3 protein                            |
| 1480          | PPRY        | PNSDPPRYQFLW    | NP_872312          | hypothetical protein                      |
| 1481          | PPRY        | PNSDPPRYEFLW    | NP_775970          | melanoma antigen family B                 |
| 1482          | PPRY        | SSSAPPRYSPPY    | NP_060408          | hypothetical protein                      |
| 1483          | PPRY        | PPPPPPRYDPCA    | NP_542378          | T-box 1 isoform C                         |
| 1484          | PPRY        | QSPAPPRYDPRP    | XP_499167          | hypothetical protein                      |
| 1485          | PPRY        | PPSRPPRYSSSS    | BAC85327           | unnamed protein                           |
| 1486          | PPRY        | LATQPPRYKYTP    | XP_379484          | hypothetical protein                      |
| 1487          | PPRY        | CLPCPPRYRGNQ    | NP_003238          | thrombospondin 2 precursor                |
| 1488          | PPRY        | LHPHPPRYLLLLS   | AAQ76878           | FOXD4                                     |
| 1489          | PPRY        | RAPLPPRYSNQN    | NP_001438          | FAT tumor suppressor 2 precursor          |
| 1490          | PPRY        | KSPLPPRYAAVN    | CAA53021           | protein tyrosine kinase-receptor          |
| 1491          | PPRY        | RLPPPPRYTVPR    | NP_036450          | leucine zipper-EF-hand containing protein |
| 1492          | PPRY        | EPPQPPRYISIF    | CAH70789           | chromosome 10 open reading frame 63       |
| 1493          | PPRY        | RPPMPPRYPAPY    | AAH65264           | unknown protein                           |
| 1494          | PPRY        | VPPLPPRYRFRD    | AAI03951           | unknown protein                           |
| 1495          | PPRY        | VLPLPPRYRFRD    | BAA92660           | KIAA1422 protein                          |
| 1496          | PPRY        | LQPPPPRYKRFS    | BAB15239           | unnamed protein                           |

| <b>SPOT #</b> | <b>PPxY</b> | <b>Sequence</b> | <b>Accession #</b> | <b>Name of the protein</b>                      |
|---------------|-------------|-----------------|--------------------|-------------------------------------------------|
| 1497          | PPRY        | RPPIPPRYRRYA    | AAC96163           | T-cell receptor beta chain                      |
| 1498          | PPSY        | WVRSPPSYSVLY    | NP_009217          | synaptopodin                                    |
| 1499          | PPSY        | SEASPPSYIVLA    | NP_085142          | basic helix-loop-helix containing protein       |
| 1500          | PPSY        | LSRNPPSYIAPY    | AAH32835           | TMEM67 protein                                  |
| 1501          | PPSY        | ASLNPPSYLLLL    | BAC87165           | unnamed protein                                 |
| 1502          | PPSY        | LELHPPSYPSH     | AAV38601           | cytochrome c-1                                  |
| 1503          | PPSY        | LEVHPPSYPSH     | CAA30052           | unnamed protein                                 |
| 1504          | PPSY        | IGDVPPSYVQTK    | NP_031370          | transcription termination factor, RNA Pol I     |
| 1505          | PPSY        | IYQVPPSYQNQG    | AAH20686           | NEDD9 protein                                   |
| 1506          | PPSY        | YQQGPPSYQKQG    | NP_938054          | TAK1-binding protein 3                          |
| 1507          | PPSY        | GDQNPPSYLFCG    | NP_001012779       | RGM domain family, member B                     |
| 1508          | PPSY        | DISFPPSYPYSE    | CAI39942           | inositol polyphosphate-5-phosphatase, 40kDa     |
| 1509          | PPSY        | LLGTPPSYPYWG    | AAB08508           | T-cell receptor delta chain                     |
| 1510          | PPSY        | KNFLPPSYLMMG    | CAE45889           | hypothetical protein                            |
| 1511          | PPSY        | STYIPPSYISEM    | AAH67089           | NUP210 protein                                  |
| 1512          | PPSY        | SSVLPPSYASDR    | BAA91078           | unnamed protein                                 |
| 1513          | PPSY        | MAAAPPSCFVA     | NP_055581          | secernin 1                                      |
| 1514          | PPSY        | RAASPPSYTLDL    | EAL24101           | family with sequence similarity 40              |
| 1515          | PPSY        | VRPLPPSYLDER    | AAN40504           | melanoma-associated antigen                     |
| 1516          | PPSY        | QEEGPPSYYDNQ    | AAH41788           | glutamate receptor, ionotropic                  |
| 1517          | PPSY        | KVQMPPSYLDTE    | NP_005119          | pad-1-like                                      |
| 1518          | PPSY        | RDQMPPSYLLER    | XP_031009          | similar to Fer113 protein                       |
| 1519          | PPSY        | QLRFPPSYRNRT    | BAD96931           | carbohydrate sulfotransferase 12 variant        |
| 1520          | PPSY        | RNQFPPSYAGIS    | NP_006355          | SEC23-related protein A                         |
| 1521          | PPSY        | RRAQPPSYMHIF    | AAH36869           | unknown protein                                 |
| 1522          | PPSY        | SYCEPPSYRPMH    | NP_001780          | cell division cycle 25a isoform a               |
| 1523          | PPSY        | RCSLPPSYCSKL    | CAI16235           | MDN1, midasin homolog (yeast)                   |
| 1524          | PPSY        | LGTTPPSYKVRW    | CAI13054           | hyaluronan and proteoglycan link protein        |
| 1525          | PPSY        | KSSGPPSYFIKR    | AAH12456           | C15orf24 protein                                |
| 1526          | PPSY        | VHRIPPSYVKMI    | XP_086001          | Galectin-13                                     |
| 1527          | PPSY        | MPDVPPSYSHYY    | CAH72941           | similar to mouse Jedi 736 protein               |
| 1528          | PPSY        | PCLSPPSYTFPA    | AAH19932           | RBM35a protein                                  |
| 1529          | PPSY        | KARHPPSYVVYG    | CAI18868           | pecanex-like 2 (Drosophila)                     |
| 1530          | PPSY        | ERRNPPSYAMAG    | BAD93016           | NAD(P)H dehydrogenase, quinone 2                |
| 1531          | PPSY        | AERFPPSYTSYL    | NP_055527          | hypothetical protein                            |
| 1532          | PPSY        | YWQAPPSYLGDR    | AAM12527           | laminin alpha5 chain precursor                  |
| 1533          | PPSY        | NLIIPPSYLTSL    | BAD92602           | diacylglycerol kinase epsilon                   |
| 1534          | PPSY        | LSAAPPSCFRGF    | NP_006099          | spondin 1, extracellular matrix protein         |
| 1535          | PPSY        | QGIAPPSCVAAA    | BAC86075           | unnamed protein                                 |
| 1536          | PPSY        | EGTQPPSYVLLRA   | XP_373915          | hypothetical protein                            |
| 1537          | PPSY        | IKRDPPSYFFGT    | AAH51789           | LOC129293 protein                               |
| 1538          | PPSY        | RGATPPSYRSSE    | NP_001002848       | lymphocyte antigen 6 complex G5C isoform C      |
| 1539          | PPSY        | SAVIPPSYRPTP    | CAD19000           | protein tyrosine phosphatase, non-receptor type |
| 1540          | PPSY        | RPLKPPSYSSHQ    | CAI17240           | novel protein                                   |
| 1541          | PPSY        | RALTPPSYSTAK    | CAI45980           | hypothetical protein                            |
| 1542          | PPSY        | CDLLPPSYSKTQ    | CAH71603           | RP11-23J9.1                                     |

| <b>SPOT #</b> | <b>PPxY</b> | <b>Sequence</b> | <b>Accession #</b> | <b>Name of the protein</b>                                                                   |
|---------------|-------------|-----------------|--------------------|----------------------------------------------------------------------------------------------|
| 1543          | PPSY        | YGYIPPSYNLPD    | NP_009041          | telomerase-associated protein 1                                                              |
| 1544          | PPSY        | NLTPPPSYAATI    | BAA03393           | BTEB2                                                                                        |
| 1545          | PPSY        | GSVQPPSYGVQL    | XP_498024          | similar to Keratin, (Cytokeratin 18)<br>RHG05_HUMAN Rho-GTPase-activating protein 5 (p190-B) |
| 1546          | PPSY        | KEPRPPSYTISI    | Q13017             | basonuclein                                                                                  |
| 1547          | PPSY        | DCRPPPSYPGSG    | A46415             | unknown protein                                                                              |
| 1548          | PPSY        | CSSCPPSYQGSC    | AAI07049           | cysteine-rich secretory protein LCCL                                                         |
| 1549          | PPSY        | CSECPPSYGGSC    | NP_113664          | protease inhibitor 15 preproprotein                                                          |
| 1550          | PPSY        | CSSCPPSYGGSC    | NP_056970          | Ig heavy chain variable region                                                               |
| 1551          | PPSY        | CARHPPSYCGGD    | CAC94945           | unnamed protein                                                                              |
| 1552          | PPSY        | GFPKPPSYNVAT    | BAC11670           | poliovirus receptor-related 4                                                                |
| 1553          | PPSY        | EGQPPPSYNWTR    | CAI15376           | 8-oxoguanine DNA glycosylase isoform 1c                                                      |
| 1554          | PPSY        | AQATPPSYRCCS    | NP_058213          | erythropoietin receptor precursor                                                            |
| 1555          | PPSY        | AEPLPPSYVACS    | NP_000112          | hypothetical protein                                                                         |
| 1556          | PPSY        | TQSLPPSYHSCR    | T08707             | Ig a heavy chain                                                                             |
| 1557          | PPSY        | TFLVPPSYFFDP    | AAF78682           | Cannabinoid receptor 2 (macrophage)                                                          |
| 1558          | PPSY        | CLRYPPSYKALL    | AAH74767           | CSPG2 protein                                                                                |
| 1559          | PPSY        | MPTLPPSYNTSE    | AAH50524           | A, PA Inhibitor-1 Complex With Somatomedin B                                                 |
| 1560          | PPSY        | VHHPPSYVAHL     | 1OC0               | plasminogen activator inhibitor                                                              |
| 1561          | PPSY        | AVHHPPSYVAHL    | CAA28444           | FAP protein                                                                                  |
| 1562          | PPSY        | CCDHPPSYPLHF    | AAC51145           | matriptase                                                                                   |
| 1563          | PPSY        | CGTYPPSYNLTF    | NP_068813          | Ig heavy chain variable region                                                               |
| 1564          | PPSY        | DFAAPPSYGMDV    | AAC18237           | SRY-box 15                                                                                   |
| 1565          | PPSY        | FGYRPPSYSTAY    | NP_008873          | cytochrome P450, (Cyp 2C8)                                                                   |
| 1566          | PPSY        | IVSLPPSYQICF    | AAB35292           | SNAP25-interacting protein                                                                   |
| 1567          | PPSY        | AGGRPPSYAGSP    | NP_079524          | T-cell receptor delta chain                                                                  |
| 1568          | PPSY        | ALGDPPSYRFSP    | AAC51447           | TCR delta chain (VJ)                                                                         |
| 1569          | PPSY        | ALGDPPSYDKNG    | CAA81714           | corresponding V_region                                                                       |
| 1570          | PPSY        | YCAFPSSYVGDP    | AAC41843           | testes-specific nuclear ribonucleoprotein G-T                                                |
| 1571          | PPSY        | GRGTPPSYGGGG    | AAH57796           | RNA binding motif protein, X-linked-like 1                                                   |
| 1572          | PPSY        | TRGPPPSYGGSS    | NP_062556          | Ig heavy chain variable region                                                               |
| 1573          | PPSY        | SDYQPPSYYGMD    | AAB06439           | transcription initiation factor IIIB isoform 3                                               |
| 1574          | PPSY        | EECDPPSYTAGQ    | NP_663718          | KIAA1086 protein                                                                             |
| 1575          | PPSY        | TSYPSPSYNPTC    | BAA83038           | nucleoporin 214kDa                                                                           |
| 1576          | PPSY        | VTGEPPSYSSGS    | NP_005076          | unknown protein                                                                              |
| 1577          | PPSY        | LSGDPPSYLTGE    | AAH53854           | interleukin 22 receptor, alpha 1                                                             |
| 1578          | PPSY        | PDSWPPSYGVCM    | NP_067081          | novel protein                                                                                |
| 1579          | PPSY        | EPSKPPSYDIKF    | CAI52479           | dedicator of cytokinesis 6                                                                   |
| 1580          | PPSY        | VDQPPPSYSVLT    | NP_065863          | tumor protein p73                                                                            |
| 1581          | PPSY        | SHLQPPSYGPVL    | NP_005418          | ATP-binding cassette protein C12                                                             |
| 1582          | PPSY        | IDKSPPSYITQP    | AAL79529           | GAA protein                                                                                  |
| 1583          | PPSY        | WCFPPSYPSYK     | AAH40431           | CAGH45                                                                                       |
| 1584          | PPSY        | GTMVPPSYSSQP    | AAB91440           | unnamed protein                                                                              |
| 1585          | PPSY        | GKQLPPSYGTYP    | BAC86342           | odd-paired homolog, Drosophila                                                               |
| 1586          | PPSY        | GIPEPPSYLLFP    | CAI42303           | unknown protein                                                                              |
| 1587          | PPSY        | GGPHPPSYSLPP    | AAP34465           |                                                                                              |

| <b>SPOT #</b> | <b>PPxY</b> | <b>Sequence</b> | <b>Accession #</b> | <b>Name of the protein</b>                           |
|---------------|-------------|-----------------|--------------------|------------------------------------------------------|
| 1588          | PPSY        | GLAHPPSYSNPP    | CAI16966           | USP6 N-terminal like                                 |
| 1589          | PPSY        | KGMNPPSYYTQP    | Q99732             | LITF_HUMAN LPS-induced TNF-alpha factor              |
| 1590          | PPSY        | GDMKPPSYDSDE    | NP_003153          | striatin, calmodulin binding protein                 |
| 1591          | PPSY        | GDMKPPSYDSDS    | XP_372490          | similar to Striatin                                  |
| 1592          | PPSY        | GAMKPPSYDSDE    | XP_497999          | similar to Striatin                                  |
| 1593          | PPSY        | SIASPPSYENVR    | CAA43784           | GTPase                                               |
| 1594          | PPSY        | ASAVPPSYQDVR    | EAL23956           | similar to galectin-related inter-fiber protein      |
| 1595          | PPSY        | GLLFPPSYVPVV    | AAS47487           | UDP glycosyltransferase 2 family polypeptide B4      |
| 1596          | PPSY        | GFIFPPSYVPVV    | AAO65542           | UDP-glucuronosyltransferase 2B7                      |
| 1597          | PPSY        | GFLFPPSYVPVV    | NP_001067          | UDP glycosyltransferase 2 family, polypeptide B15    |
| 1598          | PPSY        | GLIFPPSYIPIV    | AAI07061           | unknown protein                                      |
| 1599          | PPSY        | GLIFPPSYIPVV    | NP_444267          | UDP glycosyltransferase 2 family, polypeptide B28    |
| 1600          | PPSY        | GFLPSPSYGAVI    | XP_373028          | similar to UDP-glucuronosyltransferase 2B4 precursor |
| 1601          | PPSY        | KVPYPPSYVPAV    | NP_006789          | UDP glycosyltransferase 2 family, polypeptide A1     |
| 1602          | PPSY        | AQHRPPSYHPSQ    | AAL55777           | unknown protein                                      |
| 1603          | PPSY        | MCIPPSYADLG     | CAG33245           | VDAC2                                                |
| 1604          | PPSY        | TMCIPPSYADLG    | CAI40914           | voltage-dependent anion channel 2                    |
| 1605          | PPSY        | PMCIPPSYADLG    | XP_496551          | similar to voltage-dependent anion channel 2         |
| 1606          | PPSY        | ASCSPPSYAGLG    | NP_060642          | hypothetical protein                                 |
| 1607          | PPSY        | VMSLPPSYKDKP    | AAH41761           | DOCK5 protein                                        |
| 1608          | PPSY        | LANLPPSYHNET    | AAS86757           | putative tumor suppressor Dkk-3/REIC                 |
| 1609          | PPSY        | LAHLPPSYESAV    | BAC86949           | unnamed protein                                      |
| 1610          | PPSY        | LFHIPPSYKSTV    | AAQ76714           | migration-inducing protein MIG8                      |
| 1611          | PPSY        | LASLPPSYQDSL    | XP_496005          | similar to RIKEN cDNA E030025D05                     |
| 1612          | PPSY        | EVTQPPSYEDAV    | AAV33439           | myocardin                                            |
| 1613          | PPSY        | TPSTPPSYLQVS    | XP_374289          | hypothetical protein                                 |
| 1614          | PPSY        | PLFSPPSYRVTI    | NP_001438          | FAT tumor suppressor 2 precursor                     |
| 1615          | PPSY        | PQFQPPSYQATV    | NP_001399          | cadherin EGF La G seven-pass G-type receptor 2       |
| 1616          | PPSY        | PSSLPPSYFGNQ    | NP_009121          | Sec23-interacting protein p125                       |
| 1617          | PPSY        | RKISPPSYARRD    | AAQ89303           | SWAP2                                                |
| 1618          | PPSY        | PECYPPSYPSAM    | AAH39297           | Fibronectin type III domain containing 3B            |
| 1619          | PPSY        | PNFIPPSYPSGQ    | AAN87336           | enamelin                                             |
| 1620          | PPSY        | PEEKPPSYRSLD    | NP_787120          | Ig-like domain containing receptor 1                 |
| 1621          | PPSY        | DQPPPPSYIYGA    | NP_523354          | male-specific lethal 3-like 1 isoform b              |
| 1622          | PPSY        | ASSPPPSYFLFS    | NP_997250          | hypothetical protein                                 |
| 1623          | PPSY        | PEVGPPSYAPQV    | NP_067081          | interleukin 22 receptor, alpha 1                     |
| 1624          | PPSY        | PRTGPPSYAKDD    | CAI16682           | laminin, alpha 2 (merosin)                           |
| 1625          | PPSY        | PRLNPPSYEDDQ    | AAP12677           | lactase-phlorizin hydrolase-1                        |
| 1626          | PPSY        | SHPLPPSYRKFL    | AAT66172           | HSD11                                                |
| 1627          | PPSY        | QKPAPPSYQRWL    | XP_371430          | similar to sushi domain containing 2                 |
| 1628          | PPSY        | PKPAPPSYQRWR    | NP_062547          | sushi domain containing 2                            |
| 1629          | PPSY        | QKPAPPSYQRWR    | XP_496497          | similar to KIAA0649 gene product                     |
| 1630          | PPSY        | PGPRPPSYSRAA    | NP_443078          | elastin microfibril interfacier 3                    |
| 1631          | PPSY        | RRPGPPSYEAHL    | NP_055901          | dendrin                                              |
| 1632          | PPSY        | RKLSPPSYCKLA    | BAC87065           | unnamed protein                                      |
| 1633          | PPSY        | RRFSPPSYSKLT    | NP_006036          | ATPase, Class II, type 9a                            |

| <b>SPOT #</b> | <b>PPxY</b> | <b>Sequence</b> | <b>Accession #</b> | <b>Name of the protein</b>                     |
|---------------|-------------|-----------------|--------------------|------------------------------------------------|
| 1634          | PPSY        | RRFSPPSYSKLT    | BAA31586           | KIAA0611 protein                               |
| 1635          | PPSY        | DLEGPPSYKPPT    | AAQ19178           | poliovirus receptor related 2                  |
| 1636          | PPSY        | MDLGPPSYVPAT    | AAM73708           | PI-3-kinase ATX                                |
| 1637          | PPSY        | LLLDPPSYVPDT    | BAD97266           | pantothenate kinase 4 variant                  |
| 1638          | PPSY        | TAACPPSYDRVT    | AAX81984           | unknown                                        |
| 1639          | PPSY        | PNGLPPSYTIIL    | CAH71310           | collagen, type XII, alpha 1                    |
| 1640          | PPSY        | PEGLPPSYVFS     | CAB66559           | hypothetical protein                           |
| 1641          | PPSY        | SLQDPPSYPPVQ    | AAP76183           | unknown                                        |
| 1642          | PPSY        | PTDCPPSYEAVM    | CAI95093           | chromosome 1 open reading frame 2              |
| 1643          | PPSY        | YKTPPPSYNSAL    | AAH64837           | UV radiation resistance associated gene        |
| 1644          | PPSY        | RESPPPSYTSSM    | NP_079526          | tweety 3                                       |
| 1645          | PPSY        | PSHPPPSYLFLY    | BAC86426           | unnamed protein                                |
| 1646          | PPSY        | PNSSPPSYEFLW    | XP_498353          | similar to melanoma antigen                    |
| 1647          | PPSY        | PNENPPSYYSIF    | AAH35310           | proline-rich protein PRP2                      |
| 1648          | PPSY        | PVTSPPSYSSEI    | NP_113645          | membrane-spanning 4-domains, subfamily a       |
| 1649          | PPSY        | PYEAPPSYEQSC    | NP_689498          | arrestin domain containing 1                   |
| 1650          | PPSY        | QTGPPPSYRPLG    | AAH08857           | NFATC4 protein                                 |
| 1651          | PPSY        | QEQPPPSYKPLF    | NP_085044          | proline rich 7 (synaptic)                      |
| 1652          | PPSY        | STSFPPSYDSVT    | NP_000326          | voltage-gated sodium channel type V alpha      |
| 1653          | PPSY        | ATSFPPSYESVT    | NP_006505          | sodium channel, voltage-gated, type X, alpha   |
| 1654          | PPSY        | STTSPPSYDSVT    | NP_002968          | sodium channel, voltage-gated, type IX, alpha  |
| 1655          | PPSY        | STTPPPSYDSVT    | NP_008853          | sodium channel, voltage-gated, type III, alpha |
| 1656          | PPSY        | STPPPPSYEEVT    | NP_076987          | proline rich Gla (G-carboxyglutamic acid) 3    |
| 1657          | PPSY        | GPLLPPSYLHLS    | AAG17258           | unknown protein                                |
| 1658          | PPSY        | TKQPPPSYPRED    | XP_091809          | similar to WW domain binding protein 2         |
| 1659          | PPSY        | SYGQPPSYGQQP    | AAA79948           | fus-like protein                               |
| 1660          | PPSY        | PYVAPPSYEGPH    | NP_055901          | dendrin                                        |
| 1661          | PPSY        | TPGTPPSYSSRT    | AAH38857           | MAP2 protein                                   |
| 1662          | PPSY        | PVTAPPSYPPTS    | NP_053733          | Ewing sarcoma breakpoint region 1 isoform      |
| 1663          | PPSY        | PPGTPPSYKLPL    | NP_001015053       | histone deacetylase 5 isoform 3                |
| 1664          | PPSY        | RREAPPSYGQLI    | BAD92194           | suppression of tumorigenicity variant          |
| 1665          | PPSY        | QQQAPPSYGQLI    | AAH88378           | LRP10 protein                                  |
| 1666          | PPSY        | EVGSPPSYSEAL    | AAH42754           | unknown protein                                |
| 1667          | PPSY        | RPEAPPSYAEVV    | NP_065852          | arrestin domain containing 3                   |
| 1668          | PPSY        | HPEAPPSYRESI    | NP_694969          | hypothetical protein LOC169693                 |
| 1669          | PPSY        | RPGSPPSYEEAM    | BAB71378           | unnamed protein                                |
| 1670          | PPSY        | IPATPPSYESMT    | NP_055576          | putative MAPK activating protein PM28          |
| 1671          | PPSY        | IPATPPSYESVD    | AAI03746           | unknown protein                                |
| 1672          | PPSY        | VPSAPPSYEEAT    | NP_036438          | Fas apoptotic inhibitory molecule 2            |
| 1673          | PPSY        | APSAPPSYEETV    | Q99732             | LITF_HUMAN LPS-induced TNF-alpha               |
| 1674          | PPSY        | TPEPPPSYDEAV    | CAI95656           | novel protein                                  |
| 1675          | PPSY        | PAWPPPSYESIS    | NP_872338          | transmembrane protein 61                       |
| 1676          | PPSY        | PVEPPPSYQSVI    | NP_996776          | membrane-spanning 4-domains                    |
| 1677          | PPSY        | PSAPPPSYAKVI    | CAH71475           | enabled homolog                                |
| 1678          | PPSY        | LRELPPSYTPPA    | NP_003729          | patched 2                                      |
| 1679          | PPSY        | YPSYPPSYPGTW    | BAD96352           | hypothetical protein MGC8721 variant           |

| <b>SPOT #</b> | <b>PPxY</b> | <b>Sequence</b> | <b>Accession #</b> | <b>Name of the protein</b>                     |
|---------------|-------------|-----------------|--------------------|------------------------------------------------|
| 1680          | PPSY        | NRGVPPSYPPPE    | NP_056261          | transcription factor ELYS                      |
| 1681          | PPSY        | ARSVPPSYPPPQ    | CAI40402           | Cdc42 guanine nucleotide exchange factor (GEF) |
| 1682          | PPSY        | ADSPPPSYPTQQ    | NP_003695          | hypothetical protein LOC8603                   |
| 1683          | PPSY        | MHLQPPSYHRDP    | CAD92528           | unknown protein                                |
| 1684          | PPSY        | IPTQPPSYHKKP    | BAC03598           | unnamed protein                                |
| 1685          | PPSY        | FIPPPPSYNPNP    | CAD92528           | unknown protein                                |
| 1686          | PPSY        | VYVPPPSYRSP     | CAI17240           | novel protein                                  |
| 1687          | PPSY        | PQKPPPSYFAIV    | BAD92529           | N-methyl-D-aspartate receptor subunit 2D       |
| 1688          | PPSY        | PPSVPPSYPGPS    | CAH10718           | hypothetical protein                           |
| 1689          | PPSY        | PSQQPPSYGGPS    | AAV91783           | myocyte enhancer factor 2D                     |
| 1690          | PPSY        | VTTPPPSYYPYP    | NP_671698          | testes development-related NYD-SP22 isoform 3  |
| 1691          | PPSY        | RYGPPPSYPNLK    | NP_006833          | splicing factor 3B subunit 2                   |
| 1692          | PPSY        | VPPPPPSYAGIA    | NP_061916          | amyloid beta (a4) precursor protein-binding    |
| 1693          | PPSY        | PPAPPPSYGATH    | AAH59379           | solute carrier family 17, member 7             |
| 1694          | PPSY        | PPVPPPSYFATF    | NP_004807          | chromosome 9 open reading frame 61             |
| 1695          | PPSY        | PLTPPPSYGHQP    | NP_057011          | androgen receptor coactivator aRa55            |
| 1696          | PPSY        | LGPPPPSYTCFR    | AAL68925           | p53-associated cellular protein P ACT          |
| 1697          | PPSY        | LPPPPPSYPSPK    | CAI19632           | novel protein similar to espin (ESPN)          |
| 1698          | PPSY        | AYPPPPSYPSPK    | CAH18435           | hypothetical protein                           |
| 1699          | PPSY        | LAPPPPSYPCGP    | NP_038463          | retina and anterior neural fold homeobox       |
| 1700          | PPSY        | TPLPPPSYMHAG    | CAI13212           | ash1 (absent, small, or homeotic)-like         |
| 1701          | PPSY        | PPPAPPSYSDKG    | NP_722520          | friend of GATA -1                              |
| 1702          | PPSY        | PPSPPPSYHPPP    | BAA96046           | KIAA1522 protein                               |
| 1703          | PPSY        | PPQPPPSYYPPT    | XP_085151          | YLP motif containing 1                         |
| 1704          | PPSY        | PPPPPPSYSTL     | BAA83003           | KIAA1051 protein                               |
| 1705          | PPSY        | PPPPPPSYMHIP    | NP_938054          | TAK1-binding protein 3 isoform 2               |
| 1706          | PPSY        | PPPPPPSYDPDY    | AAH09074           | hypothetical protein LOC51101                  |
| 1707          | PPSY        | QPPPPPSYSPAR    | NP_653333          | E1B-55kDa-associated protein 5 isoform d       |
| 1708          | PPTY        | AMVWPPTYSRNE    | NP_001438          | FAT tumor suppressor 2 precursor               |
| 1709          | PPTY        | ASERPPTYCELV    | NP_005481          | SH2 domain containing 3A                       |
| 1710          | PPTY        | DIRLPPTYAAFV    | XP_292184          | similar to immune-responsive gene 1            |
| 1711          | PPTY        | LRKNPPTYSSST    | AAH16465           | KIAA1043 protein                               |
| 1712          | PPTY        | EESDPPTYKDAF    | AAY14717           | unknown                                        |
| 1713          | PPTY        | ENAFPPTYVLQA    | CAH18655           | hypothetical protein                           |
| 1714          | PPTY        | FFIFPPTYLFLK    | AAB09780           | branched chain alpha-ketoacid dehydrogenase    |
| 1715          | PPTY        | EISFPPTYRYER    | NP_001558          | inositol polyphosphate phosphatase-like 1      |
| 1716          | PPTY        | RLLFPPTYKFDR    | NP_057616          | muscle and kidney inositol phosphatase         |
| 1717          | PPTY        | KQQHPPTYVQNV    | CAD91164           | hypothetical protein                           |
| 1718          | PPTY        | ALHVPPTYIVEH    | XP_372682          | similar to L-threonine aldolase                |
| 1719          | PPTY        | AVPPTYADLG      | AAC24723           | plasmalemmal porin                             |
| 1720          | PPTY        | MAVPPTYADLG     | NP_003365          | voltage-dependent anion channel 1              |
| 1721          | PPTY        | VGKIPPTYQIRF    | AAH67431           | cytochrome P450, family 2, subfamily B         |
| 1722          | PPTY        | TNQTPTTYNKTN    | CAI56709           | hypothetical protein                           |
| 1723          | PPTY        | GGYDPPTYIRDL    | NP_061159          | KIAA1199 protein                               |
| 1724          | PPTY        | GGYDPPTYAMDV    | AAR85506           | Ig heavy chain                                 |
| 1725          | PPTY        | SPWKPPTYLFST    | EAL24459           | kelch repeat and BTB (POZ) domain containing 2 |

| <b>SPOT #</b> | <b>PPxY</b> | <b>Sequence</b> | <b>Accession #</b> | <b>Name of the protein</b>                                |
|---------------|-------------|-----------------|--------------------|-----------------------------------------------------------|
| 1726          | PPTY        | YPWKPPTYLFFST   | NP_056298          | repeat and BTB (POZ) domain containing 2                  |
| 1727          | PPTY        | SGWQPPTYHSGR    | NP_055932          | zinc finger CCCH-type domain containing 3                 |
| 1728          | PPTY        | AYWEPPTYIRCV    | NP_001693          | brain-specific angiogenesis inhibitor 1 precursor         |
| 1729          | PPTY        | SPRLPPTYMHAM    | NP_065812          | raptor                                                    |
| 1730          | PPTY        | ALNRPPTYPTKY    | CAB45711           | hypothetical protein                                      |
| 1731          | PPTY        | NCDPPPTYEEAT    | AAH30786           | PRRG1 protein                                             |
| 1732          | PPTY        | NCDPPPTYEEAT    | NP_000941          | proline rich Gla (G-carboxyglutamic acid) 1               |
| 1733          | PPTY        | KSKPPPTYESEE    | NP_055114          | bromodomain-containing protein 4 isoform short            |
| 1734          | PPTY        | LIPSPPTYNSAH    | CAI14716           | prostaglandin-endoperoxide synthase 1                     |
| 1735          | PPTY        | LIDSPPTYNADY    | CAG25548           | putative cyclooxygenase-2                                 |
| 1736          | PPTY        | FSNSPPTYYFDY    | AAM88059           | Ig heavy chain variable region                            |
| 1737          | PPTY        | CYSTPPTYFELP    | XP_496406          | similar to KIAA1693 protein                               |
| 1738          | PPTY        | NKRGPPPTYNEHI   | AAB71327           | putative RHO/RAC effector protein                         |
| 1739          | PPTY        | ISTEPPTYLREQ    | AAO59167           | integrase interactor 1 protein isoform E                  |
| 1740          | PPTY        | FIRAPPTYVKVE    | AAO16567           | SALL4C                                                    |
| 1741          | PPTY        | FHKQPPTYVRAQ    | CAG30491           | unknown protein                                           |
| 1742          | PPTY        | ILAQPPTYEQKQ    | XP_497683          | similar to poly(a) binding protein                        |
| 1743          | PPTY        | NQSYPPPTYNVKD   | CAI13515           | lipase a, cholesterol esterase (Wolman disease)           |
| 1744          | PPTY        | PCLSPPTYTTFQ    | AAH30146           | hypothetical protein                                      |
| 1745          | PPTY        | PDISPPTYVKKE    | CAI41340           | novel protein                                             |
| 1746          | PPTY        | AFDAPPTYASTP    | XP_371722          | similar to Leucine-rich repeat-containing protein 14      |
| 1747          | PPTY        | KPIKPPTYQVLE    | AAH67260           | SCAM-1 protein                                            |
| 1748          | PPTY        | QELKPPTYKLMT    | AAG43162           | brain my045 protein                                       |
| 1749          | PPTY        | RYS DPPTYCLPP   | NP_004136          | myosin IXB                                                |
| 1750          | PPTY        | PRRGPPPTYRADD   | NP_005550          | laminin, alpha 1 precursor                                |
| 1751          | PPTY        | RVKCPPTYPDVV    | NP_001013725       | eukaryotic translation initiation factor 2 alpha kinase 4 |
| 1752          | PPTY        | SYSTPPTYTFGQ    | AAK61517           | anti-AchR Ig kappa light chain variable region            |
| 1753          | PPTY        | SFTTPPTYTFGQ    | AAA02586           | Ig kappa-chain                                            |
| 1754          | PPTY        | VPGAPPTYISPL    | BAB14041           | unnamed protein                                           |
| 1755          | PPTY        | KFMPPPTYTE      | AAT01927           | thioredoxin binding protein 2                             |
| 1756          | PPTY        | KFMPPPTYTEVD    | NP_006463          | thioredoxin interacting protein                           |
| 1757          | PPTY        | NFTAPPTYTETL    | NP_009217          | synaptopodin                                              |
| 1758          | PPTY        | AFSTPPTYTDKL    | AAC41838           | corresponding V_region                                    |
| 1759          | PPTY        | QTFLPPTYSIID    | BAC87339           | unnamed protein                                           |
| 1760          | PPTY        | QAYCPPTYSTTG    | CAA84513           | PAX7 paired box transcription factor                      |
| 1761          | PPTY        | QSYCPPTYSTTG    | AAA03628           | PAX-3                                                     |
| 1762          | PPTY        | LCYEPPTYSPAG    | CAA65726           | Spi-B transcription factor                                |
| 1763          | PPTY        | YHQIPPTYDLHG    | AAO43053           | heat shock regulated-1                                    |
| 1764          | PPTY        | CARVPPTYDISG    | AAY18479           | Ig alpha heavy chain variable region                      |
| 1765          | PPTY        | CARDPPTYSPRA    | AAT02083           | Ig heavy chain CDR3                                       |
| 1766          | PPTY        | PMKFPPTYSLAS    | NP_001007535       | hypothetical protein                                      |
| 1767          | PPTY        | PAQLPPTYQLLG    | XP_378688          | hypothetical protein                                      |
| 1768          | PPTY        | PGAEPPTYECSH    | NP_116181          | zinc finger protein 499                                   |
| 1769          | PPTY        | RSPLPPTYLRPF    | AAL73209           | prostate-specific KLK2                                    |
| 1770          | PPTY        | QPLL PPTYFLEG   | AAH31926           | unknown protein                                           |
| 1771          | PPTY        | TPMYPPTYLEPG    | AAC28341           | LIM homeobox protein cofactor                             |

| <b>SPOT #</b> | <b>PPxY</b> | <b>Sequence</b> | <b>Accession #</b> | <b>Name of the protein</b>                     |
|---------------|-------------|-----------------|--------------------|------------------------------------------------|
| 1772          | PPTY        | NVYHPPTYHDML    | CAI40214           | RP11-334J6                                     |
| 1773          | PPTY        | RVYQPPTYNRII    | NP_036230          | angiopoietin-like 2 precursor                  |
| 1774          | PPTY        | HSQQPPTYTRVF    | XP_373456          | hypothetical protein                           |
| 1775          | PPTY        | ALFMPPTYDDAW    | NP_004025          | annexin VII isoform 2                          |
| 1776          | PPTY        | HQLLPPTYRDVW    | AAH56219           | DEAH (Asp-Glu-Ala-His) box polypeptide 29      |
| 1777          | PPTY        | CGLIPPTYRGVV    | CAI21612           | unknown protein                                |
| 1778          | PPTY        | CGLIPPTYRGVW    | AAI03906           | unknown protein                                |
| 1779          | PPTY        | CGLIPPTYRGVR    | AAI03908           | Patatin-like phospholipase domain containing 1 |
| 1780          | PPTY        | FKHAPPTYEDVI    | NP_689594          | cardiomyopathy associated 3                    |
| 1781          | PPTY        | FKLAPPTYEDVI    | BAB71224           | unnamed protein                                |
| 1782          | PPTY        | PPSKPPTYEEQD    | CAA87094           | phosphatidylinositol 3-kinase                  |
| 1783          | PPTY        | MEGPPPTYSEVI    | NP_954640          | prostate androgen-induced protein              |
| 1784          | PPTY        | MEGPPPTYSEVM    | NP_852147          | hypothetical protein LOC753                    |
| 1785          | PPTY        | EPPEPPTYRAQG    | NP_003449          | bassoon                                        |
| 1786          | PPTY        | RASPPPTYSPSM    | CAH10576           | hypothetical protein                           |
| 1787          | PPTY        | APPTYDAVV       | CAD91647           | cytochrome P450                                |
| 1788          | PPTY        | PLYAPPTYDAVV    | CAD91347           | hypothetical protein                           |
| 1789          | PPTY        | PNKAPPTYDTVL    | CAD91345           | cytochrome P450                                |
| 1790          | PPTY        | PNKAPPTYDAVV    | BAD96728           | cytochrome P450, family 3                      |
| 1791          | PPTY        | PLYTPPTYGAQQ    | AAC39873           | synaptic glycoprotein SC2                      |
| 1792          | PPTY        | PPPPPTYRTVV     | CAI22674           | novel protein                                  |
| 1793          | PPTY        | PPPGPPTYDPAL    | BAD92649           | neogenin homolog 1 variant                     |
| 1794          | PPTY        | YPPPPPTYNPNF    | BAD92610           | unknown protein                                |
| 1795          | PPTY        | PGFPPPTYVIPP    | NP_775179          | SMG-7 homolog isoform 1                        |
| 1796          | PPTY        | AGGPPPTYPASP    | CAD39119           | hypothetical protein                           |
| 1797          | PPTY        | SPAVPPTYPSGP    | BAD18729           | unknown protein                                |
| 1798          | PPTY        | FPTAPPTYPPYP    | NP_003473          | myeloid/lymphoid leukemia 2                    |
| 1799          | PPVY        | GKISPPVYLTNE    | CAI41988           | similar to Nik-related kinase (Nrk)            |
| 1800          | PPVY        | SQLYPPVYYFLS    | NP_001002918       | olfactory receptor, family 8                   |
| 1801          | PPVY        | CFQYPPVYVGKI    | AAR05448           | Werner syndrome                                |
| 1802          | PPVY        | LVDIPPVYGLYA    | CAE45910           | hypothetical protein                           |
| 1803          | PPVY        | KDCKPPVYLLLE    | BAD97202           | MYB-related protein B variant                  |
| 1804          | PPVY        | APRRPPVYKFI     | AAH30007           | BRD1 protein                                   |
| 1805          | PPVY        | IAFSPPVYPAGI    | AAH12116           | unknown protein                                |
| 1806          | PPVY        | YSVPPPVYGCHT    | CAI95760           | Wilms tumor 1                                  |
| 1807          | PPVY        | GEKNPPVYSSRV    | XP_031689          | MAX dimerization protein 5                     |
| 1808          | PPVY        | QLLLPPVYSAVL    | NP_789768          | pyrimidinergic receptor P2Y6                   |
| 1809          | PPVY        | LSVRPPVYLHDV    | BAD92555           | glutamate receptor, ionotropic, delta 2        |
| 1810          | PPVY        | NVEAPPVYDSYE    | NP_849191          | seizure related 6 homolog                      |
| 1811          | PPVY        | QCESPVYSGYY     | XP_294219          | similar to RIKEN cDNA a930017N06 gene          |
| 1812          | PPVY        | GIATPPVYGQLL    | NP_006701          | COP9 signalosome subunit 8 isoform 1           |
| 1813          | PPVY        | TPIKPPVYNSRL    | NP_055167          | POU transcription factor                       |
| 1814          | PPVY        | DDSKPPVYGACK    | CAA36016           | unnamed protein                                |
| 1815          | PPVY        | VKPLPPVYLTF     | NP_000631          | interleukin 13 receptor                        |
| 1816          | PPVY        | DTLVPPVYTVSQ    | NP_705613          | interleukin 17 receptor E isoform 1            |
| 1817          | PPVY        | GSSLPPVYWLP     | EAL24019           | LCHN protein                                   |

| <b>SPOT #</b> | <b>PPxY</b> | <b>Sequence</b> | <b>Accession #</b> | <b>Name of the protein</b>                      |
|---------------|-------------|-----------------|--------------------|-------------------------------------------------|
| 1818          | PPVY        | DTPCPPVYAETK    | NP_937984          | telomerase reverse transcriptase isoform 4      |
| 1819          | PPVY        | QCVPEPPVYPTPT   | AAH94738           | ZNF341 protein                                  |
| 1820          | PPVY        | SYSNPPVYHGNS    | CAI16966           | USP6 N-terminal like                            |
| 1821          | PPVY        | VVGSPPVYSVTS    | CAH72782           | polycystic kidney and hepatic disease 1         |
| 1822          | PPVY        | RTQSPPVYTATS    | NP_066550          | cyclic nucleotide-gated potassium channel 1     |
| 1823          | PPVY        | HQQRPPVYRRPG    | NP_112564          | testis expressed sequence 13a                   |
| 1824          | PPVY        | EAKLPPVYVRKE    | NP_056224          | E1a binding protein p400                        |
| 1825          | PPVY        | TSHEPPVYMDED    | AAH35079           | ZZZ3 protein                                    |
| 1826          | PPVY        | LSPEPPVYSLQD    | NP_005035          | protein kinase, X-linked                        |
| 1827          | PPVY        | HEKQPPVYCTSP    | CAI13212           | ash1-like                                       |
| 1828          | PPVY        | ARWLPPVYEDGF    | AAH95448           | thyroid peroxidase, isoform a                   |
| 1829          | PPVY        | NMPYPPVYHQSP    | AAH68454           | PDCD6IP protein                                 |
| 1830          | PPVY        | LRPRPPVYDDGP    | AAH94731           | unknown protein                                 |
| 1831          | PPVY        | ICPTPPVYEEHE    | AAI01074           | Slit and trk like 6                             |
| 1832          | PPVY        | FVPQPPVYQEGE    | XP_496208          | similar to KIAA0563 gene product                |
| 1833          | PPVY        | NESRPPVYQHVP    | CAI21483           | zinc finger, SWIM domain containing 5           |
| 1834          | PPVY        | QRSRPPVYECVP    | XP_498453          | hypothetical protein                            |
| 1835          | PPVY        | LHAGPPVYFVLE    | BAD92285           | Niemann-Pick disease, type C1 variant           |
| 1836          | PPVY        | SRHWPPVYVVDM    | AAH63691           | KIAA0194 protein                                |
| 1837          | PPVY        | RPPQPPVYLFVF    | AAH19341           | SEC24A protein                                  |
| 1838          | PPVY        | LAQAPPVYLDVL    | NP_001012331       | neurotrophic tyrosine kinase, receptor type     |
| 1839          | PPVY        | EAQLPPVYPVAS    | CAI13046           | IQ motif containing GTPase activating protein 3 |
| 1840          | PPVY        | KETLPPVYALEL    | NP_006178          | 2'-5'oligoadenylate synthetase 3                |
| 1841          | PPVY        | SQSMPPVYPSVD    | NP_065741          | MASK-4E-BP3 protein                             |
| 1842          | PPVY        | SVSTPPVYPPKN    | AAN15137           | ALFY                                            |
| 1843          | PPVY        | TFIAPPVYSNIT    | AAH15668           | C14orf43 protein                                |
| 1844          | PPVY        | TFIAPPVYSDIT    | AAH09202           | C14orf43 protein                                |
| 1845          | PPVY        | YFIKPPVYVTVS    | AAH64544           | unknown protein                                 |
| 1846          | PPVY        | PGLEPPVYVPPP    | CAI17240           | novel protein                                   |
| 1847          | PPVY        | YFKEPPVYLPPS    | BAC86209           | unnamed protein                                 |
| 1848          | PPVY        | SHLLPPVYPPAP    | NP_659472          | ADMP                                            |
| 1849          | PPVY        | RNYLPPVYSQRG    | XP_292850          | similar to pMesogenin1                          |
| 1850          | PPVY        | STVLPPVYNQQN    | CAI14720           | ral guanine nucleotide dissociation stimulator  |
| 1851          | PPVY        | YDNLPPVYF       | AAQ22016           | Ig kappa chain variable region                  |
| 1852          | PPVY        | LHSEPPVYANLS    | CAG46552           | JUN                                             |
| 1853          | PPVY        | MSEPPVYCNLV     | BAB83128           | RGL1                                            |
| 1854          | PPVY        | LMSEPPVYCNLV    | BAB56159           | rho-GTPase activating protein                   |
| 1855          | PPVY        | LMSEPPVYCNLA    | BAC03969           | unnamed protein                                 |
| 1856          | PPVY        | LPGPPPVYAADS    | AAH08769           | JM11 protein                                    |
| 1857          | PPVY        | IRKEPPVYAAGS    | AAH43221           | ZNF512 protein                                  |
| 1858          | PPVY        | GPIVPPVYGLEV    | CAI19406           | tRNA isopentenyltransferase 1                   |
| 1859          | PPVY        | PALPPPVYYISV    | XP_497974          | similar to ligand-gated ion channel             |
| 1860          | PPVY        | LREPPPVPDLA     | XP_372723          | similar to RP2 protein, testosterone-regulated  |
| 1861          | PPVY        | DEEPPPVSPPA     | NP_060419          | CUE domain-containing 1                         |
| 1862          | PPVY        | LAAPPVYYPAA     | NP_004464          | forkhead box E1                                 |
| 1863          | PPVY        | KAGPPPVYLPSV    | NP_001002860       | BTB (POZ) domain containing 7 isoform 1         |

| <b>SPOT #</b> | <b>PPxY</b> | <b>Sequence</b> | <b>Accession #</b> | <b>Name of the protein</b>                |
|---------------|-------------|-----------------|--------------------|-------------------------------------------|
| 1864          | PPVY        | LKKPPPVRPVV     | CAB41303           | guanylate cyclase 2F, retinal             |
| 1865          | PPVY        | YPAGPPVYNPAA    | AAH61908           | TMEM58 protein                            |
| 1866          | PPVY        | AAIPPPVYEEQD    | CAH73603           | RNA binding motif protein 17              |
| 1867          | PPVY        | PPPLPPVYSMET    | BAD93098           | protein phosphatase 2a isoform 1          |
| 1868          | PPVY        | PPVPPPVEYEP     | NP_001010892       | radial spokehead-like 3                   |
| 1869          | PPVY        | PPPPPPVYEPVS    | NP_003370          | villin 2                                  |
| 1870          | PPVY        | PPPPPPVYCVCR    | BAD18641           | unnamed protein                           |
| 1871          | PPVY        | GPEPPPVTNLS     | BAD96252           | jun B proto-oncogene variant              |
| 1872          | PPVY        | LAPAPPVYEAVS    | AAH66364           | SIN3A protein                             |
| 1873          | PPVY        | GYQPPPVI        | NP_004701          | synaptogyrin 2                            |
| 1874          | PPVY        | VRGPPPVTNGK     | NP_872325          | antimicrobial peptide RY2G5               |
| 1875          | PPVY        | YNNWPPVYTFG     | AAM46492           | Ig kappa light chain variable region      |
| 1876          | PPVY        | YNNWPPVYTFGQ    | CAA83042           | Ig kappa chain (Vk) V region (VJ)         |
| 1877          | PPVY        | YSPPPVYTFGQ     | AAB00156           | corresponding V_region                    |
| 1878          | PPWY        | DPARPPWYACSS    | CAI20105           | unknown protein                           |
| 1879          | PPWY        | TAGRPPWYNEHG    | CAC15496           | URKL1                                     |
| 1880          | PPWY        | AQTQPPWYQLPP    | NP_077292          | leukocyte receptor cluster (LRC) member 1 |
| 1881          | PPWY        | DPRSPPWYARAW    | CAD39119           | hypothetical protein                      |
| 1882          | PPWY        | RSEKPPWYSSGP    | AAH57395           | KIAA0377 protein                          |
| 1883          | PPWY        | DPRSPPWYARAW    | AAH33898           | hypothetical protein                      |
| 1884          | PPWY        | AQTQPPWYQLPP    | AAG01393           | LENG1 protein                             |
| 1885          | PPWY        | YSKLPPWYPIPH    | NP_078780          | PR domain containing 14                   |
| 1886          | PPWY        | HSREPPWYYYMD    | AAS86001           | Ig heavy chain                            |
| 1887          | PPWY        | IEDVPPWYLCIL    | AAH19225           | SLC23a1 protein                           |
| 1888          | PPWY        | IEDVPPWYLCIF    | AAD11783           | nucleobase transporter-like 1 protein     |
| 1889          | PPYY        | RRRFPPYYMRRP    | AAH72014           | YBX1 protein                              |
| 1890          | PPYY        | VVLSPPYYIFCR    | BAC87019           | unnamed protein                           |
| 1891          | PPYY        | VTPKPPYYNILL    | AAH67417           | activin a receptor, type IIa, precursor   |
| 1892          | PPYY        | QDGGPPYYMIET    | CAI22978           | aNKRD5                                    |
| 1893          | PPYY        | CQHRPPYYGYVK    | CAI23098           | novel protein                             |
| 1894          | PPYY        | MPWDPPYYSGVI    | CAI39630           | mitochondrial intermediate peptidase      |
| 1895          | PPYY        | HPVNPPYYIPLV    | CAI14389           | crystallin, lambda 1                      |
| 1896          | PPYY        | KTFRPPYYHRNC    | NP_000178          | homogentisate 1,2-dioxygenase             |
| 1897          | PPYY        | QDVAPPYYKNNV    | BAB85073           | unnamed protein                           |
| 1898          | PPYY        | GNHVPPYYGNSV    | NP_001002295       | GATA binding protein 3 isoform 1          |
| 1899          | PPYY        | AIGFPPYYAHTA    | NP_068773          | connexin 46                               |
| 1900          | PPYY        | HMDNPPYYRITS    | CAH10365           | hypothetical protein                      |
| 1901          | PPYY        | PHSSPPYYEFLW    | CAG33449           | MAGEE1                                    |
| 1902          | PPYY        | VSTAPPYYDYVW    | BAC01881           | Ig heavy chain VHDJ region                |
| 1903          | PPYY        | NSIPPPYYTTSQ    | XP_038604          | unc-13 homolog a                          |
| 1904          | PPYY        | INERPPYYLGRD    | AAH08362           | DUS3L protein                             |
| 1905          | PPYY        | AQGRPPYYTPNQ    | CAI16425           | poly(A)binding protein                    |
| 1906          | PPYY        | FGGRPPYYSEEM    | AAN87336           | enamelin                                  |
| 1907          | PPYY        | HHTPPPPYYSRPS   | NP_699202          | PDZ domain containing ring finger 1       |
| 1908          | PPYY        | YDYEPPYYDVMT    | CAA20240           | collagen type XI alpha 2                  |
| 1909          | PPYY        | PQRQPPYYSCQC    | NP_077719          | notch 2 preproprotein                     |

| <b>SPOT #</b> | <b>PPxY</b> | <b>Sequence</b> | <b>Accession #</b> | <b>Name of the protein</b>                        |
|---------------|-------------|-----------------|--------------------|---------------------------------------------------|
| 1910          | PPYY        | ITQSPPYYRCVC    | NP_004123          | hyaluronan binding protein 2                      |
| 1911          | PPYY        | DQSQPPYYNVTA    | CAH71056           | lipase, gastric                                   |
| 1912          | PPYY        | LMYPPPYLGLG     | AAL96664           | CTLA4                                             |
| 1913          | PPYY        | LKAKPPYYVGLG    | P61550             | provirus ancestral Env polyprotein                |
| 1914          | PPYY        | LSLQPPYYDLGV    | AAR88252           | poliovirus receptor-related 1 beta isoform        |
| 1915          | PPYY        | DVALPPYYQPEE    | CAI19180           | unknown protein                                   |
| 1916          | PPYY        | QQPGPPYYTDPG    | CAB66545           | hypothetical protein                              |
| 1917          | PPYY        | PRYSPPYYPPFE    | NP_060408          | hypothetical protein LOC55026                     |
| 1918          | PPYY        | VPPQPPYYPSNG    | CAH72624           | novel protein                                     |
| 1919          | PPYY        | PKPKPPYYPQPE    | NP_780778          | XG glycoprotein precursor                         |
| 1920          | PPYY        | PPPPPPYYPSFL    | CAD39147           | hypothetical protein                              |
| 1921          | PPYY        | PVPPPPYYPPEY    | CAI95093           | chromosome 1 open reading frame 2                 |
| 1922          | PPYY        | PLPPPPYYPPEY    | O60320             | Y574_HUMAN hypothetical protein KIAA0574          |
| 1923          | PPYY        | QPPPPPPYYPPED   | CAH56417           | hypothetical protein                              |
| 1924          | PPYY        | VPEYPPYYQEEA    | CAG46630           | CNN2                                              |
| 1925          | PPYY        | AYAPPPYYCSNI    | AAS46603           | complement inhibitory receptor                    |
| 1926          | PPYY        | EPASPPYYSEKT    | CAD91389           | peroxisome proliferative activated receptor gamma |
| 1927          | PPYY        | EGSNPPYYTDTT    | CAE46022           | hypothetical protein                              |
| 1928          | PPYY        | DGDGPPYYADSV    | AAL96550           | Ig heavy chain variable region                    |
| 1929          | PPYY        | TPAAPPPYYCDIK   | BAC86810           | unnamed protein                                   |
| 1930          | PPYY        | LKTLPPYYLLTK    | CAI40723           | DEAD/H (asp-Glu-ala-asp/His) box polypeptide 26B  |
| 1931          | PPYY        | LKTLPPYYLLVC    | NP_872346          | hypothetical protein                              |
| 1932          | PPYY        | LKTLPPYYLTKL    | CAI56763           | hypothetical protein                              |
| 1933          | PPYY        | LKTMPPYYLGPL    | AAH13358           | DDX26 protein                                     |
| 1934          | PPYY        | ETCPPPPYYHFQD   | AAH47591           | INSR protein                                      |
| 1935          | PPYY        | QEVIPPPYYSYLK   | NP_057698          | TRAF and TNF receptor-associated protein          |
| 1936          | PPYY        | QLSSPPYYYGDS    | NP_000177          | complement factor H isoform A precursor           |
| 1937          | PPYY        | GRAYPPYYYESG    | CAC01154           | Ig heavy chain variable region                    |
| 1938          | PPYY        | TYGYPPYYLSPI    | BAC87487           | unnamed protein                                   |
| 1939          | PPYY        | MDQMPPYYAASH    | CAI42864           | THO complex 2                                     |
| 1940          | PPYY        | DGYSPPPYYGLD    | AAC35979           | Ig heavy chain variable region                    |
| 1941          | PPYY        | SIFGPPYYYYYM    | CAG29717           | Ig heavy chain                                    |
| 1942          | PPYY        | REWLPPYYYYMD    | AAS85891           | Ig heavy chain                                    |
| 1943          | PPYY        | GPAEPPYYDAYA    | DAA00301           | TPA: class II basic helix-loop-helix protein      |
| 1944          | PPYY        | MDQLPPYYYYYM    | AAT65110           | Ig E variable region                              |
| 1945          | PPYY        | LTGYPPYYYYYY    | AAS22215           | Ig heavy chain variable region                    |
| 1946          | PPYY        | RVSIPPPYYYYYY   | AAZ07875           | Ig heavy chain variable region                    |
| 1947          | PPYY        | ELRLPPYYYYYY    | AAK13960           | Ig heavy chain variable region                    |
| 1948          | PPYY        | SPAGPPYYYYMD    | AAF78670           | Ig A heavy chain                                  |
| 1949          | PPYY        | GPAAPPPYYYYYY   | PH1334             | Ig heavy chain DJ region (clone C280-120)         |
| 1950          | PPYY        | RGRGPPYYYYYG    | AAD53806           | Ig heavy chain variable region                    |
| 1951          | PPYY        | SSSWPPYYYYYG    | CAC88721           | Ig heavy chain variable region                    |
| 1952          | PPYY        | ARGCPPYYGMDV    | AAV39804           | Ig mu heavy chain                                 |
| 1953          | PPYY        | SGGYPPYYNNGI    | BAC02103           | Ig heavy chain VHDJ region                        |
| 1954          | PPYY        | AAGTPPYYYYGM    | AAK13795           | Ig heavy chain variable region                    |
| 1955          | PPYY        | AAGIPPPYYGMD    | CAB75717           | Ig mu heavy chain variable region                 |

| <b>SPOT #</b> | <b>PPxY</b> | <b>Sequence</b> | <b>Accession #</b> | <b>Name of the protein</b>                |
|---------------|-------------|-----------------|--------------------|-------------------------------------------|
| 1956          | PPYY        | QGQWPPYYGNVD    | NP_653333          | E1B-55kDa-associated protein 5 isoform d  |
| 1957          | PPYY        | RLFLPPYYDSS     | AAV40571           | Ig mu heavy chain                         |
| 1958          | PPYY        | ARDPPYYDSS      | CAC14123           | Ig heavy chain variable region            |
| 1959          | PPYY        | RGNPPYYDIGT     | P01824             | HV2F_HUMAN Ig heavy chain V-II region WaH |
| 1960          | PPYY        | RGIPPPYYDFWS    | CAC15816           | Ig heavy chain variable region            |
| 1961          | PPYY        | CARHPPYYFDYW    | AAM88120           | Ig heavy chain variable region            |
| 1962          | PPYY        | QQLAPPYYFDYW    | AAD01845           | Ig heavy chain                            |
| 1963          | PPYY        | WQGWPPYYFDYW    | CAC87217           | Ig heavy chain variable region            |
| 1964          | PPYY        | YCASPPYYDSS     | AAS22228           | Ig heavy chain variable region            |
| 1965          | PPYY        | CARVPPYYDSS     | AAD00849           | IgM heavy chain variable region           |
