# Supplementary material
Source: PubMed Central journal article supplement (PMC2885219)
Supplement: supp_M109.084525_jbc.M109.084525-10.pdf [file supp_M109.084525_jbc.M109.084525-10.pdf]

**Supplementary Table 3. Classification of arrayed peptides according to their relative binding to the wt and Y65C mutant PQBP1 WW domain.**

| Class 1 | Y65C mutant reactivity is less than wt |               |                |           |               |
|---------|----------------------------------------|---------------|----------------|-----------|---------------|
| SPOT#   | sequence                               | wt reactivity | mut reactivity | log ratio | ranking score |
| 3       | RPPRLLPPRPGP                           | 1.6948        | 1.2824         | -0.4124   | 836           |
| 7       | PPPPPLPFACC                            | 2.2982        | 1.7816         | -0.5166   | 651           |
| 8       | PPPPPLPFQTS                            | 1.5604        | 0.6128         | -0.9476   | 184           |
| 23      | DSLCLPRQRPPM                           | 1.5289        | 1.0970         | -0.4320   | 791           |
| 34      | LPSLPPLPARCL                           | 2.4433        | 1.6850         | -0.7583   | 337           |
| 54      | AAPCPPRWQLG                            | 2.1023        | 1.5355         | -0.5669   | 580           |
| 57      | LPAAPSPSRPWF                           | 1.5571        | 1.2045         | -0.3527   | 945           |
| 71      | LRFGPPAYRRFS                           | 1.4538        | 0.8036         | -0.6502   | 480           |
| 86      | NSRCPPAYTMVG                           | 1.3693        | 0.8914         | -0.4779   | 710           |
| 87      | PVYSPPAYHMHV                           | 1.1952        | 0.9273         | -0.2678   | 1102          |
| 90      | RPVFPPAYWTSP                           | 1.5458        | 1.2351         | -0.3107   | 1024          |
| 93      | YRAAPPAYGRGG                           | 2.1335        | 1.8655         | -0.2681   | 1100          |
| 124     | VPKSPPAYARSS                           | 1.4307        | 0.7086         | -0.7221   | 379           |
| 144     | SCQLPPAYDTR                            | 1.4232        | 1.1584         | -0.2648   | 1109          |
| 149     | APSRPPAYQAMG                           | 2.0258        | 1.5763         | -0.4494   | 752           |
| 159     | GPGIPPAYSSPR                           | 1.9002        | 0.6531         | -1.2472   | 43            |
| 160     | LRHSPPAYSGPA                           | 1.8791        | 0.8153         | -1.0638   | 119           |
| 161     | RFKEPPAYGPMC                           | 2.3271        | 1.8771         | -0.4500   | 750           |
| 162     | PAPRPPAYNRAL                           | 2.2517        | 1.3390         | -0.9127   | 208           |
| 164     | SGPLPPAYSPRY                           | 1.9631        | 0.5637         | -1.3994   | 18            |
| 176     | PPGPPPAYAPT                            | 1.7490        | 0.9487         | -0.8003   | 296           |
| 177     | SGPPPPAYHYRN                           | 1.7619        | 1.2744         | -0.4875   | 695           |
| 178     | PPPPPPAYNYGS                           | 1.9788        | 1.0810         | -0.8978   | 216           |
| 180     | EPPPPPAYRTGC                           | 1.6912        | 0.9280         | -0.7632   | 329           |
| 181     | PPPGPPAYDPYG                           | 2.3449        | 1.4718         | -0.8731   | 236           |
| 190     | LKRVPPCYLGNS                           | 2.1821        | 1.7554         | -0.4267   | 805           |
| 196     | PGQAPPCYAPTY                           | 1.5852        | 1.0476         | -0.5377   | 621           |
| 197     | PCNRPPCYVPCT                           | 2.5307        | 2.1514         | -0.3793   | 889           |
| 213     | HRYRPPDYRDLI                           | 2.1105        | 1.6815         | -0.4291   | 801           |
| 233     | CARGPPDYGDYR                           | 2.7398        | 2.4543         | -0.2856   | 1068          |
| 251     | PPRPPPDYLRGG                           | 2.2011        | 1.6635         | -0.5376   | 622           |
| 279     | RISCPPDYWGQG                           | 1.0810        | 0.6659         | -0.4151   | 828           |
| 305     | APPPPPDYHHHH                           | 2.1832        | 0.8842         | -1.2990   | 32            |
| 316     | VASRPPDYYYGM                           | 2.0502        | 0.9027         | -1.1475   | 78            |
| 327     | LCIGPPEYQEKK                           | 1.3629        | 1.0864         | -0.2765   | 1087          |
| 386     | PRGPPPEYPFKT                           | 2.7726        | 1.5360         | -1.2366   | 52            |
| 387     | HRGPPPEYPFKG                           | 2.2656        | 1.3467         | -0.9188   | 207           |
| 403     | SPTPPPFYGLG                            | 1.2447        | 0.2572         | -0.9874   | 162           |
| 414     | KHPGPPFYVPHA                           | 0.9655        | 0.6064         | -0.3591   | 928           |
| 425     | LPARPPFYAPAH                           | 2.8572        | 2.1057         | -0.7515   | 343           |
| 427     | SPPFPFFYSTKP                           | 1.0232        | 0.7338         | -0.2894   | 1058          |
| 428     | PPFPFFYSTKP                            | 1.7080        | 1.3649         | -0.3432   | 961           |
| 429     | SPPFPFFYSTKL                           | 1.1819        | 0.5596         | -0.6223   | 506           |
| 454     | GGLKPPGYVQR                            | 1.5112        | 1.2000         | -0.3112   | 1022          |
| 508     | CARAPPGYCSST                           | 2.4813        | 2.1671         | -0.3142   | 1017          |
| 529     | VAGSPPGYWGQG                           | 1.2067        | -0.0391        | -1.2458   | 44            |
| 539     | AMGAPPGYRPSA                           | 1.3798        | 0.5909         | -0.7889   | 303           |
| 545     | HAPYPPGYQRHF                           | 1.5565        | 1.1323         | -0.4242   | 812           |
| 549     | YPSLPPGYQNIT                           | 1.6904        | 0.7010         | -0.9894   | 161           |

|     |               |        |        |         |      |
|-----|---------------|--------|--------|---------|------|
| 550 | YPSLPPGYQNTT  | 2.0284 | 1.1210 | -0.9074 | 211  |
| 553 | KKKRPPGYYSYL  | 1.3611 | 1.0021 | -0.3590 | 929  |
| 566 | GLRGPPGYTFGS  | 1.4199 | 0.5296 | -0.8902 | 227  |
| 569 | FSNRPPGYPSQP  | 2.4151 | 1.3152 | -1.0999 | 96   |
| 570 | IQNRPPGYPNMN  | 2.0556 | 0.8588 | -1.1968 | 64   |
| 575 | LGPPPPGYHPFL  | 2.1694 | 1.6386 | -0.5308 | 635  |
| 585 | QRLPPPGYGRPP  | 1.2908 | 0.7872 | -0.5036 | 682  |
| 587 | RTGTPPGYRGTS  | 1.9654 | 1.1885 | -0.7769 | 313  |
| 589 | AHGPPPGYGCAA  | 2.3328 | 1.3638 | -0.9690 | 174  |
| 590 | SFGTTPPGYGCAA | 1.5207 | 0.5930 | -0.9277 | 201  |
| 601 | PCQPPPGYAPVP  | 1.4120 | 0.6173 | -0.7947 | 300  |
| 603 | RSSPPPGYVPER  | 1.6829 | 0.9245 | -0.7583 | 336  |
| 605 | PSVPPPGYMPRQ  | 1.1814 | 0.1528 | -1.0286 | 137  |
| 610 | LPSCPPGYFDAR  | 2.4530 | 2.1766 | -0.2765 | 1086 |
| 612 | PPMPPPGYFGQA  | 1.5769 | 1.0724 | -0.5045 | 679  |
| 616 | FPPPPPGYNASS  | 1.1930 | 0.4885 | -0.7046 | 401  |
| 617 | LPPPPPGYPAPK  | 2.0793 | 1.1042 | -0.9751 | 170  |
| 623 | GSAGPPGYGPR   | 2.1665 | 0.9902 | -1.1762 | 71   |
| 624 | GPQGPPGYGKMG  | 2.7200 | 1.6104 | -1.1096 | 92   |
| 625 | GPPGPPGYGPAG  | 2.3301 | 1.0409 | -1.2892 | 35   |
| 626 | GPPGPPGYGSQG  | 2.7054 | 1.3045 | -1.4009 | 17   |
| 627 | GPAGPPGYGPQG  | 2.1064 | 1.2376 | -0.8688 | 240  |
| 628 | GPPGPPGYKGFP  | 3.0029 | 2.2602 | -0.7427 | 355  |
| 629 | GPPGPPGYPGKQ  | 2.8925 | 1.9069 | -0.9856 | 164  |
| 630 | GPPGPPGYCDSS  | 2.1651 | 1.0971 | -1.0680 | 116  |
| 631 | GARGPPGYRGPT  | 2.0400 | 1.2574 | -0.7826 | 306  |
| 635 | MYP CPPGYPYPP | 1.3935 | 0.8211 | -0.5724 | 568  |
| 649 | TCTCPPGYGGFH  | 1.2458 | 0.7894 | -0.4564 | 741  |
| 653 | RCICPPGYAGDH  | 1.5099 | 1.2193 | -0.2906 | 1055 |
| 659 | LCSCPPGYQGRS  | 2.4013 | 1.9509 | -0.4504 | 749  |
| 662 | HCHCPPGYTGRY  | 2.7078 | 2.4197 | -0.2881 | 1064 |
| 664 | LCKCPPGYSGTI  | 2.0641 | 1.6038 | -0.4604 | 735  |
| 666 | CGACPPGYSGNG  | 1.2898 | 0.6126 | -0.6772 | 433  |
| 673 | IGLSPPHYGHYG  | 2.1369 | 1.7401 | -0.3968 | 861  |
| 678 | FQALPPHYGRPY  | 1.1605 | 0.7945 | -0.3659 | 916  |
| 683 | YGPPPPHYEGRR  | 2.6210 | 2.2341 | -0.3869 | 880  |
| 684 | KPPLPPHYTSTA  | 1.4168 | 0.5559 | -0.8608 | 246  |
| 689 | PPSSPPHYQRVP  | 1.7328 | 1.1400 | -0.5929 | 544  |
| 691 | RTPGPPHYPPPH  | 2.7164 | 2.1046 | -0.6118 | 518  |
| 694 | PSRPPPHYPGIK  | 2.6821 | 1.7787 | -0.9035 | 213  |
| 695 | PSRPPPHYPGIK  | 2.7130 | 1.9611 | -0.7519 | 342  |
| 696 | PPPPPHYPVLQ   | 2.0269 | 0.9989 | -1.0280 | 138  |
| 697 | PWPPPHYSIAL   | 1.5382 | 0.8046 | -0.7337 | 370  |
| 715 | GGRAPPHYGYTF  | 1.7119 | 1.3733 | -0.3386 | 968  |
| 753 | PSIHPPHYPSIH  | 1.3944 | 0.7759 | -0.6185 | 511  |
| 754 | PSIHPPHYPCIH  | 1.4415 | 1.0116 | -0.4299 | 797  |
| 774 | KRGRPPKYNAVL  | 2.0582 | 1.7257 | -0.3324 | 979  |
| 778 | LDGCPPKYAKTL  | 1.6322 | 1.3625 | -0.2697 | 1098 |
| 805 | YRTNPPKYPSKQ  | 1.8873 | 1.5994 | -0.2879 | 1066 |
| 810 | YGSSPPKYTFGA  | 2.3278 | 1.8923 | -0.4355 | 783  |
| 813 | EVL CPPKYLKLS | 1.3328 | 1.0771 | -0.2557 | 1124 |
| 828 | LPPFPKYYLAM   | 1.1263 | 0.7328 | -0.3935 | 873  |
| 863 | AFRHPPLYPGPA  | 1.5502 | 0.9513 | -0.5989 | 535  |
| 915 | CPRPPPLYLMVP  | 2.2203 | 1.5594 | -0.6609 | 462  |

|      |                |        |        |         |      |
|------|----------------|--------|--------|---------|------|
| 917  | VPRPPPLYSHRM   | 2.7673 | 2.2816 | -0.4858 | 698  |
| 928  | RHSNPPLYPSRP   | 1.4409 | 0.9804 | -0.4605 | 733  |
| 929  | VHPPPPPLYPLRP  | 1.1825 | 0.4076 | -0.7749 | 315  |
| 930  | PVPPPPPLYPPPP  | 1.2977 | 0.0143 | -1.2834 | 39   |
| 931  | PPPPPPPLYPRRG  | 2.3037 | 1.5043 | -0.7994 | 297  |
| 932  | PPPPPPPLYQRVS  | 1.8357 | 1.2014 | -0.6343 | 495  |
| 936  | LLPPPPPLYTRHR  | 1.8882 | 1.3379 | -0.5504 | 602  |
| 938  | QLPPPPPLYRPRW  | 1.6464 | 0.5811 | -1.0653 | 118  |
| 946  | RSSFPPPLYSSGL  | 1.1166 | 0.4482 | -0.6685 | 449  |
| 950  | WSPSPPLYEEYR   | 1.3648 | 0.6389 | -0.7259 | 377  |
| 951  | SPKYPPPLYPPGR  | 2.0156 | 1.2410 | -0.7745 | 316  |
| 984  | YGSSPPMYTFGQ   | 1.2034 | 0.5084 | -0.6950 | 408  |
| 987  | CARRPPMYHFDY   | 2.5240 | 2.2050 | -0.3190 | 1007 |
| 996  | GSPGPPNYFDYW   | 1.0840 | 0.4319 | -0.6521 | 473  |
| 1006 | PGPAPPNYSRPH   | 1.0771 | 0.8079 | -0.2692 | 1099 |
| 1021 | PTFIPPNYRVKV   | 1.8543 | 1.5091 | -0.3452 | 958  |
| 1037 | RVIRPPNYAGPL   | 0.8995 | 0.5542 | -0.3453 | 957  |
| 1053 | FRKAPPNYAMKK   | 2.2814 | 1.5283 | -0.7531 | 340  |
| 1076 | PYGRPPPYDRGD   | 1.6638 | 1.3389 | -0.3249 | 995  |
| 1077 | RHYMPPPYASLT   | 1.8264 | 1.5085 | -0.3179 | 1009 |
| 1082 | PTFIPPPYGVLR   | 1.2434 | 0.9816 | -0.2618 | 1114 |
| 1086 | VSFPPPYLARS    | 1.0523 | 0.2911 | -0.7612 | 333  |
| 1096 | GPCLPPPYVRTA   | 2.2980 | 1.7645 | -0.5335 | 631  |
| 1114 | TRNSPPPYGFHL   | 1.3864 | 0.8799 | -0.5065 | 671  |
| 1118 | ARARPPPYTG VW  | 1.7777 | 1.5217 | -0.2559 | 1122 |
| 1119 | GRKYPPPYKHFW   | 1.7687 | 1.2841 | -0.4846 | 699  |
| 1131 | QHHTPPPYYSRP   | 2.2660 | 1.1809 | -1.0851 | 106  |
| 1132 | HHGSPPPYNQRP   | 2.6235 | 2.2347 | -0.3888 | 878  |
| 1136 | TVLPPPYRHRN    | 1.5216 | 1.1821 | -0.3395 | 967  |
| 1141 | EGLWPPPYRPRR   | 1.3939 | 0.9507 | -0.4432 | 770  |
| 1144 | FHDPPPYTAYK    | 1.2656 | 0.4256 | -0.8400 | 265  |
| 1153 | AVWQPPPYGATK   | 1.2188 | 0.6812 | -0.5376 | 623  |
| 1157 | GAGSPPPYRRRK   | 1.6192 | 0.8385 | -0.7807 | 309  |
| 1162 | KRPPPPPYNCRY   | 2.9644 | 1.9819 | -0.9824 | 165  |
| 1166 | GPGSPPPYKMIQ   | 1.9299 | 0.5778 | -1.3522 | 24   |
| 1175 | QRPQPPPYWRGP   | 2.0956 | 1.0167 | -1.0789 | 111  |
| 1177 | GYPTPPPYPFTP   | 2.3154 | 1.5351 | -0.7803 | 310  |
| 1181 | FPRAPPPYPTHH   | 2.8872 | 2.1094 | -0.7778 | 312  |
| 1183 | TRHPPPYNTAK    | 1.8696 | 1.0250 | -0.8446 | 261  |
| 1193 | APLSPPPYLPHR   | 1.7814 | 0.4800 | -1.3014 | 31   |
| 1198 | WVPGPPPYLPRQ   | 2.3894 | 1.5811 | -0.8083 | 290  |
| 1208 | VVAPPPPYMHPW   | 2.0160 | 0.6131 | -1.4029 | 16   |
| 1214 | RYSPPPYSSH S   | 2.8779 | 2.2060 | -0.6719 | 442  |
| 1220 | RALPPPYTTFP    | 1.9233 | 1.2214 | -0.7018 | 403  |
| 1221 | SPPGPPPYGKRA * | 3.1702 | 2.4038 | -0.7664 | 327  |
| 1222 | APSPPPYPVTP    | 2.3424 | 0.6328 | -1.7097 | 1    |
| 1228 | SPPAPPPYKAPR   | 1.7057 | 0.6160 | -1.0897 | 105  |
| 1229 | PGRIPPPYSCTP   | 1.6252 | 0.9892 | -0.6360 | 493  |
| 1233 | LCIQPPPYPGNI   | 1.9551 | 1.1865 | -0.7686 | 321  |
| 1234 | YPAGPPPYGHDH   | 2.3976 | 1.5592 | -0.8384 | 267  |
| 1235 | SYPGPPPYGHDH   | 1.8848 | 0.5235 | -1.3613 | 21   |
| 1237 | VRGPPPYQMTP    | 2.5763 | 1.3366 | -1.2397 | 49   |
| 1238 | VRGPPPYHSKP    | 2.7399 | 1.5516 | -1.1883 | 67   |
| 1239 | PHQQPPPYPLMH   | 1.6659 | 0.7935 | -0.8724 | 238  |

|      |              |        |        |         |     |
|------|--------------|--------|--------|---------|-----|
| 1242 | VCTPPPPYPPSW | 2.2796 | 1.5366 | -0.7430 | 354 |
| 1246 | HCTPPPPYHADP | 1.4237 | 0.3054 | -1.1182 | 90  |
| 1249 | YQGPPPPYPKHL | 2.5466 | 1.8711 | -0.6755 | 437 |
| 1250 | VPSPPPPYTTSH | 2.6962 | 1.3695 | -1.3268 | 27  |
| 1259 | LGHWPPPYVPR  | 1.4672 | 0.8760 | -0.5912 | 547 |
| 1260 | PYRSPPPYVPPA | 1.5960 | 0.5479 | -1.0481 | 128 |
| 1262 | FTRPPPPYPGNI | 1.9072 | 0.2529 | -1.6543 | 3   |
| 1264 | QRSPPPPYPGNA | 1.7287 | 0.5196 | -1.2091 | 62  |
| 1267 | GPPRPPPYGYQR | 2.6664 | 2.2250 | -0.4414 | 771 |
| 1268 | QKSPPPPYSRLS | 1.7532 | 0.6560 | -1.0972 | 100 |
| 1273 | CPLPPPPYQNS  | 2.4478 | 1.7356 | -0.7123 | 389 |
| 1274 | CPPPPPPYQNS  | 3.0006 | 2.1638 | -0.8368 | 269 |
| 1275 | APPPPPPYRMHG | 2.9955 | 2.2341 | -0.7614 | 331 |
| 1276 | PPGPPPPYHAHA | 3.1389 | 2.1434 | -0.9955 | 154 |
| 1277 | PQGPPPPYHAHA | 2.3900 | 1.1275 | -1.2625 | 41  |
| 1282 | PPSPPPPYDSRL | 2.5199 | 1.0495 | -1.4704 | 12  |
| 1283 | PPTPPPPYSAFQ | 2.3822 | 1.4618 | -0.9205 | 206 |
| 1284 | PHPQPPPYGHCV | 3.0622 | 2.3888 | -0.6734 | 441 |
| 1285 | SGPQPPPYGHCV | 2.5206 | 1.6299 | -0.8908 | 226 |
| 1286 | PHPHPPPYPHFT | 2.9491 | 2.4564 | -0.4927 | 690 |
| 1287 | AAPPPPPYPYLV | 2.3514 | 1.0720 | -1.2794 | 40  |
| 1288 | LGPYPPPYPPPA | 2.7600 | 1.4047 | -1.3553 | 23  |
| 1289 | PSHPPPPYPFGS | 2.5714 | 1.8357 | -0.7357 | 367 |
| 1290 | PPYPPPPYPSGE | 1.6214 | 0.5473 | -1.0741 | 113 |
| 1292 | PPPPPPPYSGCA | 2.3888 | 1.1520 | -1.2368 | 51  |
| 1296 | PPPPPPPYGRLL | 2.1650 | 0.9547 | -1.2104 | 61  |
| 1297 | GPPPPPPYGRLL | 2.2325 | 0.8755 | -1.3570 | 22  |
| 1298 | PVPPPPPYLASY | 2.2594 | 0.6566 | -1.6028 | 5   |
| 1299 | PPPPPPPYPSF  | 2.5154 | 1.2738 | -1.2416 | 48  |
| 1300 | PPPPPPPYGPR  | 2.7552 | 1.6637 | -1.0915 | 104 |
| 1301 | PPSPPPPYGPR  | 3.0040 | 2.2105 | -0.7934 | 301 |
| 1302 | PPPHPPPYGPR  | 2.9184 | 1.9791 | -0.9393 | 194 |
| 1303 | PPPPPPPYLASL | 2.2778 | 0.9577 | -1.3201 | 29  |
| 1304 | KLPPPPPYGRLL | 1.8838 | 1.3104 | -0.5734 | 565 |
| 1306 | PQPPPPPYGHKR | 2.4607 | 1.4918 | -0.9690 | 175 |
| 1307 | FPPPPPPYFPES | 1.7698 | 0.5547 | -1.2151 | 58  |
| 1308 | LPPPPPPYNHPH | 2.4242 | 1.2898 | -1.1344 | 83  |
| 1309 | LPPPPPPYHPPA | 2.1123 | 1.0300 | -1.0823 | 109 |
| 1310 | LFRPPPPYPRPR | 2.4402 | 2.0654 | -0.3748 | 899 |
| 1311 | VYRPPPPYPPPR | 2.7876 | 2.2820 | -0.5057 | 676 |
| 1314 | RISPPPPYPPPK | 2.4505 | 1.5073 | -0.9432 | 189 |
| 1317 | LAPPPPPYRQPP | 2.5070 | 0.8234 | -1.6836 | 2   |
| 1318 | PPSLPPPYQRH  | 2.6430 | 1.6069 | -1.0361 | 133 |
| 1319 | PPYFPPPYQPP  | 2.2840 | 1.2822 | -1.0018 | 152 |
| 1320 | PPYFPPPYQLA  | 1.7586 | 1.0817 | -0.6769 | 434 |
| 1321 | PPYFPPPYQPIY | 1.6937 | 0.9761 | -0.7176 | 384 |
| 1322 | PPYFPPPYQLP  | 1.8071 | 0.7845 | -1.0225 | 143 |
| 1323 | PGAPPPPYLPPQ | 1.7386 | 0.6780 | -1.0606 | 121 |
| 1337 | CASAPPQYSLK  | 2.4973 | 1.7286 | -0.7687 | 320 |
| 1341 | YPCCPPQYCLNQ | 1.3823 | 0.9224 | -0.4599 | 736 |
| 1354 | CELWPPQYPSKG | 1.9242 | 1.3769 | -0.5473 | 606 |
| 1358 | FSCKPPQYGQLE | 1.9457 | 1.5843 | -0.3614 | 924 |
| 1359 | RSCTPPQYGGRP | 2.6709 | 2.3445 | -0.3263 | 989 |
| 1372 | KPGSPPQYLLRY | 1.9281 | 1.1759 | -0.7522 | 341 |

|      |              |        |         |         |      |
|------|--------------|--------|---------|---------|------|
| 1373 | KPGSPQYLLKY  | 1.5662 | 1.2769  | -0.2893 | 1059 |
| 1378 | KPVSPQYLLRY  | 1.2354 | 0.8696  | -0.3658 | 918  |
| 1379 | SRGPPPQYPHVV | 1.5588 | 1.1299  | -0.4290 | 802  |
| 1384 | RGRNPPQYQRSP | 1.2840 | 0.8366  | -0.4474 | 758  |
| 1390 | PRLSPPQYSHQV | 1.8566 | 0.9130  | -0.9436 | 188  |
| 1416 | PLRKPPRYSDLH | 1.5934 | 1.2382  | -0.3552 | 935  |
| 1421 | TQLRPPRYIHKA | 1.9296 | 1.3594  | -0.5702 | 573  |
| 1425 | GFPGPPRYRSAA | 2.9447 | 2.5014  | -0.4432 | 769  |
| 1430 | PFPQPPRYPLML | 1.4452 | 0.9895  | -0.4557 | 743  |
| 1449 | RFSHPPRYWPVL | 1.3987 | 1.0606  | -0.3381 | 970  |
| 1451 | RASSPPRYLQHD | 1.8863 | 1.2436  | -0.6426 | 486  |
| 1458 | ATGCPPRYECSA | 1.5880 | 1.0922  | -0.4958 | 687  |
| 1459 | CARDPPRYCSAG | 2.6930 | 2.2613  | -0.4317 | 793  |
| 1462 | VTVAPPRYLPHS | 1.5466 | 1.1408  | -0.4058 | 846  |
| 1466 | PGSPPRYQGPV  | 1.1236 | 0.2743  | -0.8494 | 256  |
| 1470 | RPFPPRYAAAA  | 1.3056 | 1.0259  | -0.2797 | 1085 |
| 1472 | YGSSPPRYSGA  | 2.1327 | 1.6671  | -0.4656 | 722  |
| 1482 | SSSAPPRYSPPY | 1.8471 | 1.0792  | -0.7679 | 324  |
| 1483 | PPPPPPRYDPCA | 2.6760 | 1.8391  | -0.8369 | 268  |
| 1485 | PPSRPPRYSSSS | 3.0611 | 2.4362  | -0.6249 | 504  |
| 1489 | RAPLPPRYSNQN | 2.0515 | 1.6043  | -0.4472 | 760  |
| 1493 | RPPMPPRYPAPY | 2.7842 | 2.3365  | -0.4477 | 757  |
| 1494 | VPPLPPRYFRD  | 2.5407 | 2.1509  | -0.3897 | 876  |
| 1522 | SYCEPPSYRPMH | 2.7479 | 2.4215  | -0.3264 | 988  |
| 1542 | CDLLPPSYSKTQ | 1.3274 | 0.9134  | -0.4140 | 832  |
| 1547 | DCRPPPSYPGSG | 0.9220 | -0.1370 | -1.0590 | 123  |
| 1552 | GFPKPPSYNVAT | 1.7702 | 0.8742  | -0.8960 | 219  |
| 1572 | TRGPPPSYGGSS | 1.2507 | 0.5831  | -0.6676 | 452  |
| 1587 | GGPHPPSYSLPP | 1.3212 | 0.2136  | -1.1076 | 93   |
| 1601 | KVPYPPSYVPAV | 1.0552 | 0.4534  | -0.6018 | 528  |
| 1602 | AQHRPPSYHPSQ | 1.9125 | 1.5139  | -0.3987 | 854  |
| 1606 | ASCSPPSYAGLG | 0.9401 | 0.6320  | -0.3081 | 1029 |
| 1627 | QKPAPPSYQRWL | 1.1769 | 0.8793  | -0.2976 | 1047 |
| 1628 | PKPAPPSYQRWR | 2.3665 | 1.5470  | -0.8194 | 283  |
| 1629 | QKPAPPSYQRWR | 1.9076 | 1.5841  | -0.3236 | 998  |
| 1630 | PGPRPPSYSRAA | 1.8578 | 1.2061  | -0.6517 | 476  |
| 1631 | RRPGPPSYEAHL | 1.6044 | 1.1661  | -0.4383 | 775  |
| 1643 | YKTPPPSYNSAL | 1.1425 | 0.0711  | -1.0714 | 115  |
| 1677 | PSAPPSYAKVI  | 1.2856 | 0.1014  | -1.1842 | 69   |
| 1686 | VYVPPPSYRSPP | 0.8088 | 0.3616  | -0.4472 | 761  |
| 1693 | PPAPPSYGATH  | 1.1044 | 0.3350  | -0.7694 | 319  |
| 1696 | LGPPPSYTCFR  | 2.0149 | 1.5928  | -0.4221 | 816  |
| 1697 | LPPPPPSYSPK  | 1.6096 | 0.6501  | -0.9594 | 177  |
| 1698 | AYPPPPSYSPK  | 1.7295 | 0.7488  | -0.9808 | 166  |
| 1699 | LAPPPPSYPCGP | 1.5654 | 0.5495  | -1.0160 | 145  |
| 1702 | PPSPPPSYHPPP | 1.6120 | 0.3668  | -1.2452 | 46   |
| 1703 | PPQPPPSYYPPT | 1.5343 | 0.6476  | -0.8867 | 229  |
| 1704 | PPPPPPSYSTLA | 1.1741 | 0.3290  | -0.8451 | 260  |
| 1705 | PPPPPPSYMHIP | 1.9099 | 0.4352  | -1.4748 | 10   |
| 1707 | QPPPPPSYSPAR | 1.4525 | 1.0554  | -0.3972 | 859  |
| 1729 | SPRLPPTYMHAM | 1.5784 | 1.0673  | -0.5111 | 662  |
| 1730 | ALNRPPTYPTKY | 1.3143 | 0.8533  | -0.4609 | 732  |
| 1741 | FHKQPPTYVRAQ | 1.3004 | 0.8953  | -0.4051 | 847  |
| 1750 | PRRGPPTYRADD | 0.8593 | 0.0328  | -0.8265 | 275  |

|                |                                              |                      |                       |                  |                      |
|----------------|----------------------------------------------|----------------------|-----------------------|------------------|----------------------|
| 1751           | RVKCPPTYPDVV                                 | 1.4920               | 0.7470                | -0.7450          | 352                  |
| 1761           | QSYCPPTYSTTG                                 | 1.0009               | 0.4692                | -0.5317          | 632                  |
| 1765           | CARDPPTYSPRA                                 | 2.0585               | 1.8039                | -0.2547          | 1126                 |
| 1777           | CGLIPPTYRGVV                                 | 3.0951               | 2.5322                | -0.5629          | 584                  |
| 1779           | CGLIPPTYRGVR                                 | 3.0806               | 2.7674                | -0.3132          | 1018                 |
| 1786           | RASPPPTYSPSM                                 | 1.3572               | 0.4166                | -0.9406          | 192                  |
| 1792           | PPPPPTYRTVV                                  | 1.9264               | 0.9318                | -0.9946          | 155                  |
| 1794           | YPPPPPTYNPNF                                 | 2.1783               | 1.3485                | -0.8298          | 274                  |
| 1798           | FPTAPPTYPPYP                                 | 1.6524               | 0.0344                | -1.6180          | 4                    |
| 1823           | HQQRPPVYRRPG                                 | 1.9312               | 1.2344                | -0.6968          | 407                  |
| 1834           | QRSRPPVYECVP                                 | 1.9038               | 1.1356                | -0.7682          | 323                  |
| 1865           | YPAGPPVYNPAA                                 | 1.5076               | 0.0318                | -1.4758          | 9                    |
| 1870           | PPPPPPVYCVCR                                 | 1.5492               | 1.1054                | -0.4438          | 767                  |
| 1874           | VRGPPPVYTN GK                                | 2.5562               | 1.3078                | -1.2484          | 42                   |
| 1878           | DPARPPWYACSS                                 | 1.8501               | 1.3982                | -0.4519          | 747                  |
| 1879           | TAGRPPWYNEHG                                 | 2.1498               | 1.2636                | -0.8862          | 230                  |
| 1905           | AQGRPPYYTPNQ                                 | 2.2705               | 1.3086                | -0.9619          | 176                  |
| 1907           | HHTPPPYYSRPS                                 | 2.4478               | 1.1242                | -1.3236          | 28                   |
| 1920           | PPPPPPYYPSFL                                 | 2.1485               | 0.9618                | -1.1866          | 68                   |
| 1929           | TPAAPPYCDIK                                  | 1.4252               | 1.0103                | -0.4149          | 829                  |
| 1952           | ARGCPPYYGMDV                                 | 2.2268               | 1.5091                | -0.7178          | 383                  |
| <b>Class 2</b> | <b>Y65C mutant reactivity is equal to wt</b> |                      |                       |                  |                      |
| <b>SPOT#</b>   | <b>sequence</b>                              | <b>wt reactivity</b> | <b>mut reactivity</b> | <b>log ratio</b> | <b>ranking score</b> |
| 13             | SCTRLPRAQPPL                                 | 2.3552               | 2.2869                | -0.0683          | 1478                 |
| 14             | HRSRLPRAKPPL                                 | 1.5312               | 1.4537                | -0.0775          | 1467                 |
| 16             | CAPGRPRAQPPA                                 | 3.1685               | 2.9679                | -0.2007          | 1249                 |
| 37             | CGLGLPRPPMLL                                 | 2.4826               | 2.3090                | -0.1736          | 1306                 |
| 48             | RLRALPRALFRN                                 | 1.1000               | 1.3310                | 0.2310           | 1848                 |
| 49             | PRLRVLPRATGL                                 | 1.3382               | 1.1872                | -0.1511          | 1337                 |
| 55             | CAPCPPRPASPV                                 | 1.6802               | 1.4645                | -0.2156          | 1220                 |
| 56             | ASPCPPRRRGC                                  | 2.5419               | 2.5965                | 0.0546           | 1651                 |
| 59             | AAPCQPRPTHFV                                 | 1.0248               | 1.1352                | 0.1104           | 1730                 |
| 89             | RISRPPAYLPRS                                 | 2.2405               | 1.9983                | -0.2422          | 1159                 |
| 96             | GLMRPPAYCDAK                                 | 1.2830               | 1.1555                | -0.1275          | 1381                 |
| 145            | GCLIPPAYEPWR                                 | 1.2485               | 1.3265                | 0.0780           | 1688                 |
| 186            | CCPRPPAYPSAG                                 | 2.3316               | 2.3564                | 0.0247           | 1622                 |
| 187            | ACPPPPAYCNTP                                 | 1.3848               | 1.2035                | -0.1813          | 1292                 |
| 191            | LRQPPPCYLTAW                                 | 0.9922               | 0.9292                | -0.0629          | 1489                 |
| 216            | WIRNPPDYHQFK                                 | 1.0601               | 1.0786                | 0.0185           | 1612                 |
| 243            | VFRCPDYPIHP                                  | 1.5969               | 1.4400                | -0.1568          | 1328                 |
| 273            | RPACPPDYTLAL                                 | 1.7010               | 1.6884                | -0.0126          | 1563                 |
| 274            | RTACPPDYTLAM                                 | 0.6977               | 0.8237                | 0.1260           | 1744                 |
| 304            | FSQCPPDYHHIH                                 | 0.9952               | 0.8182                | -0.1770          | 1299                 |
| 308            | KKFVPPDYKIHR                                 | 1.1233               | 1.2373                | 0.1140           | 1734                 |
| 326            | YCEGPPEYKKRK                                 | 2.6229               | 2.8071                | 0.1841           | 1806                 |
| 329            | FCAMPPEYKGHQ                                 | 1.8998               | 1.6685                | -0.2313          | 1188                 |
| 343            | KGCKPPEYRNYQ                                 | 2.3776               | 2.3218                | -0.0558          | 1500                 |
| 384            | RYQHPPEYGAAR                                 | 0.7653               | 0.5728                | -0.1925          | 1267                 |
| 410            | YRKGPPFYHAS Y                                | 2.1434               | 2.0778                | -0.0655          | 1485                 |
| 421            | HCDNPPFYRFTA                                 | 1.8476               | 1.7522                | -0.0955          | 1432                 |
| 479            | CAVPPPGYALNF                                 | 1.2336               | 1.0182                | -0.2154          | 1222                 |
| 506            | CAKRPPGYSSSW                                 | 2.8148               | 2.7756                | -0.0392          | 1523                 |
| 507            | CAREPPGYCSSA                                 | 1.5224               | 1.5084                | -0.0140          | 1560                 |
| 542            | IHGPPGYAPYC                                  | 1.9800               | 1.9238                | -0.0562          | 1499                 |

|     |              |        |        |         |      |
|-----|--------------|--------|--------|---------|------|
| 561 | LCFHPPGYSEQK | 1.8239 | 1.5926 | -0.2313 | 1187 |
| 576 | KFLPPPGYAPCY | 1.7846 | 1.5623 | -0.2223 | 1205 |
| 577 | KFLPPPGYAPCH | 2.0175 | 1.8020 | -0.2155 | 1221 |
| 592 | SARPPPGYGCAA | 2.0003 | 1.7894 | -0.2109 | 1229 |
| 611 | LHDCPPGYFGIR | 1.5370 | 1.4455 | -0.0915 | 1445 |
| 632 | GTRGPPGYRGPT | 1.3163 | 1.2258 | -0.0905 | 1447 |
| 637 | LCPSPPGYLCTL | 1.3572 | 1.3751 | 0.0179  | 1611 |
| 638 | FCPAPPGYLRQG | 2.2339 | 2.1411 | -0.0928 | 1442 |
| 644 | ACQCPPGYQKRG | 1.7292 | 1.9556 | 0.2264  | 1841 |
| 645 | RCICPPGYEVKS | 1.8656 | 1.6294 | -0.2362 | 1170 |
| 646 | RCICPPGYSLQN | 1.5423 | 1.5313 | -0.0110 | 1573 |
| 652 | RCTCPPGYTGLR | 2.2607 | 2.4899 | 0.2292  | 1845 |
| 655 | HCLCPPGYGLH  | 0.9422 | 0.8233 | -0.1189 | 1395 |
| 657 | QCSCPPGYRGPS | 2.1755 | 2.2355 | 0.0600  | 1664 |
| 663 | SCTCPPGYTGRN | 2.0518 | 1.8163 | -0.2355 | 1175 |
| 672 | LCNTPPHYHGFP | 2.4060 | 2.6441 | 0.2382  | 1859 |
| 674 | VTFRPPHYGAYI | 0.9981 | 1.1819 | 0.1839  | 1804 |
| 702 | KPGSPPHYLLRY | 1.5355 | 1.5099 | -0.0256 | 1541 |
| 703 | CGLAPPHYPTLL | 1.9845 | 1.9081 | -0.0764 | 1468 |
| 705 | QKFCPPHYPDSQ | 1.0375 | 0.9019 | -0.1356 | 1366 |
| 706 | RKCVPPHYKEAE | 1.6862 | 1.5557 | -0.1305 | 1377 |
| 707 | MSFHPPHYLAAR | 1.7323 | 1.7513 | 0.0190  | 1613 |
| 709 | AAAVPPHYKCLF | 0.9405 | 1.0631 | 0.1226  | 1739 |
| 717 | AARAPPHYEQYF | 1.0843 | 0.9258 | -0.1585 | 1322 |
| 718 | VQCFPPHYEIFK | 1.5031 | 1.2706 | -0.2325 | 1184 |
| 725 | VKGNPPIYRFWK | 0.8197 | 0.6785 | -0.1412 | 1355 |
| 728 | CARAPPIYDYVG | 1.7128 | 1.5378 | -0.1750 | 1303 |
| 734 | KRFTPPIYQPKK | 1.3993 | 1.3444 | -0.0550 | 1502 |
| 744 | IYKKPPIYKQRE | 1.6081 | 1.7539 | 0.1458  | 1765 |
| 745 | IYRKPPIYKQHA | 2.0485 | 2.2561 | 0.2076  | 1826 |
| 746 | IYRKPPIYRQHA | 2.3455 | 2.2426 | -0.1029 | 1421 |
| 749 | IYRKPPIYKRHG | 2.0708 | 2.2987 | 0.2280  | 1844 |
| 755 | PSMHPPIYPFIY | 0.6506 | 0.7079 | 0.0573  | 1657 |
| 766 | PGNWPPIYCKSD | 0.6152 | 0.5550 | -0.0602 | 1493 |
| 770 | SPIRPPKYTYK  | 1.9466 | 2.1229 | 0.1763  | 1795 |
| 773 | RCGRPPKYNASC | 2.6526 | 2.6434 | -0.0092 | 1576 |
| 775 | RIGRPPKYRKIP | 2.0652 | 1.9658 | -0.0994 | 1427 |
| 783 | KMRSPPKYRPFL | 2.0365 | 2.2690 | 0.2325  | 1850 |
| 792 | FTRKPPKYERFI | 1.9610 | 1.9061 | -0.0549 | 1503 |
| 793 | FIRKPPKYERLI | 1.1200 | 1.0097 | -0.1103 | 1411 |
| 807 | KKKLPPKYPHCQ | 1.7340 | 1.6493 | -0.0847 | 1456 |
| 808 | CDSRPPKYPRKS | 2.8946 | 2.7689 | -0.1257 | 1385 |
| 809 | RYNWPPKYTFGQ | 1.5652 | 1.3343 | -0.2309 | 1190 |
| 811 | YGSSPPKYTFGQ | 2.0896 | 2.1595 | 0.0699  | 1676 |
| 814 | LKMPPPKYVLWS | 0.7432 | 0.8940 | 0.1508  | 1771 |
| 816 | GCRGPPKYGSPG | 2.5958 | 2.5507 | -0.0451 | 1516 |
| 830 | DGGHPPKYFHHH | 0.9921 | 0.9606 | -0.0314 | 1536 |
| 842 | KCHTPPLYRMRI | 2.6416 | 2.4010 | -0.2407 | 1162 |
| 844 | IQFKPPLYRQRY | 1.8453 | 1.7090 | -0.1363 | 1364 |
| 893 | KGLWPPLYRPRR | 1.1311 | 1.1893 | 0.0582  | 1660 |
| 909 | GKKPPPLYLKFH | 0.9240 | 1.1420 | 0.2180  | 1832 |
| 956 | GYGMPPLYPQTG | 0.7703 | 0.5252 | -0.2451 | 1150 |
| 968 | LVACPPMYHLMK | 1.4052 | 1.4396 | 0.0344  | 1637 |
| 993 | AQRRPPNYHFRQ | 1.9057 | 2.1325 | 0.2268  | 1842 |

|      |              |        |        |         |      |
|------|--------------|--------|--------|---------|------|
| 998  | SKRPPPNYLCHL | 1.5200 | 1.5003 | -0.0197 | 1550 |
| 1011 | CKERPPNYPGSL | 1.9397 | 1.8925 | -0.0472 | 1515 |
| 1012 | CARYPPNYDSS  | 2.3993 | 2.4120 | 0.0128  | 1604 |
| 1013 | CAKFPPNYSNSW | 2.7176 | 2.5865 | -0.1311 | 1376 |
| 1016 | YGMVPPNYCSQR | 1.9795 | 2.0414 | 0.0619  | 1667 |
| 1019 | RFECPPNYVQVS | 1.0007 | 0.9613 | -0.0394 | 1522 |
| 1027 | PMFGPPNYAQKF | 1.2515 | 1.1960 | -0.0555 | 1501 |
| 1038 | RVFRPPNYSGTI | 1.2430 | 1.4868 | 0.2437  | 1865 |
| 1047 | HRKHPPNYKKPV | 1.8445 | 1.7053 | -0.1392 | 1359 |
| 1101 | LYGCPPPYHTFE | 1.0423 | 1.2447 | 0.2025  | 1823 |
| 1103 | LHGCPPPYHTFE | 1.9863 | 1.7904 | -0.1958 | 1258 |
| 1104 | LHGCPPPYHTFK | 2.9927 | 2.8066 | -0.1862 | 1279 |
| 1116 | NSRKPPPYKHIK | 1.0279 | 1.2529 | 0.2250  | 1837 |
| 1150 | PRCSPPPYHPVQ | 2.4212 | 2.4784 | 0.0572  | 1656 |
| 1225 | HDPYPPPYGPHY | 1.2290 | 0.9964 | -0.2326 | 1183 |
| 1248 | RRCPPPPYPKHL | 2.8688 | 2.6760 | -0.1928 | 1264 |
| 1330 | GARSPPQYCGTK | 1.8834 | 1.9922 | 0.1087  | 1726 |
| 1335 | GCSFPPQYSALQ | 2.0259 | 2.2098 | 0.1839  | 1805 |
| 1342 | APCCPPQYNVVQ | 1.3985 | 1.2385 | -0.1600 | 1319 |
| 1377 | KAGSPPQYLLRY | 0.8501 | 0.9785 | 0.1283  | 1746 |
| 1413 | FGCIPPRYKLCV | 1.2356 | 1.3358 | 0.1002  | 1714 |
| 1418 | ERSHPPRYRGIG | 1.9136 | 1.9722 | 0.0586  | 1661 |
| 1431 | SARRPPRYLLSA | 1.3053 | 1.5394 | 0.2341  | 1852 |
| 1435 | KPGSPPRYLLRY | 1.7346 | 1.5438 | -0.1908 | 1273 |
| 1441 | RSTKPPRYKCGI | 1.9945 | 1.8601 | -0.1344 | 1370 |
| 1442 | RSIIPPRYLCSL | 1.6750 | 1.5751 | -0.0998 | 1425 |
| 1447 | RFQEPPRYRDIC | 2.0219 | 2.1150 | 0.0931  | 1707 |
| 1448 | RELSPPRYKLVC | 1.9797 | 2.0790 | 0.0993  | 1712 |
| 1454 | AVLCPPRYPKLA | 2.1943 | 2.0569 | -0.1373 | 1362 |
| 1460 | AAGPPPRYCSST | 3.1848 | 2.9543 | -0.2305 | 1192 |
| 1461 | CATRPPRYSSGW | 3.0693 | 2.8816 | -0.1878 | 1277 |
| 1463 | TGNSPPRYRLLM | 0.9550 | 1.0465 | 0.0915  | 1705 |
| 1471 | YGSSPPRYTFAA | 1.6591 | 1.5709 | -0.0882 | 1451 |
| 1486 | LATQPPRYKYTP | 1.7710 | 1.6593 | -0.1117 | 1409 |
| 1487 | CLPCPPRYRGNQ | 2.6210 | 2.7115 | 0.0906  | 1703 |
| 1488 | LHPHPPRYLLLS | 1.5063 | 1.7093 | 0.2030  | 1824 |
| 1491 | RLPPPPRYTVPR | 2.4490 | 2.3085 | -0.1406 | 1357 |
| 1495 | VLPLPPRYRFRD | 2.1534 | 1.9602 | -0.1932 | 1262 |
| 1496 | LQPPPPRYKRFS | 2.5752 | 2.5864 | 0.0112  | 1602 |
| 1497 | RPPIPPRYRRYA | 2.6495 | 2.7548 | 0.1053  | 1719 |
| 1519 | QLRFPPSYRNRT | 1.5801 | 1.5134 | -0.0667 | 1483 |
| 1521 | RRAQPPSYMHIF | 1.9146 | 2.0382 | 0.1236  | 1741 |
| 1523 | RCSLPPSYCSKL | 2.4748 | 2.7121 | 0.2373  | 1857 |
| 1524 | LGTTPPSYKVRW | 1.6087 | 1.5574 | -0.0513 | 1510 |
| 1526 | VHRIPPSYVKMI | 1.6474 | 1.8731 | 0.2257  | 1839 |
| 1528 | PCLSPPSYTFPA | 2.2456 | 2.1503 | -0.0953 | 1433 |
| 1529 | KARHPPSYVVYG | 1.8540 | 1.7544 | -0.0996 | 1426 |
| 1540 | RPLKPPSYSSHQ | 0.9300 | 0.9817 | 0.0517  | 1650 |
| 1548 | CSSCPPSYQGSC | 0.9388 | 0.8570 | -0.0818 | 1459 |
| 1551 | CARHPPSYCGGD | 1.4319 | 1.3327 | -0.0992 | 1429 |
| 1554 | AQATPPSYRCCS | 2.0692 | 1.8561 | -0.2131 | 1226 |
| 1556 | TQSLPPSYHSCR | 2.1099 | 2.1369 | 0.0270  | 1627 |
| 1558 | CLRYPPSYKALL | 1.8823 | 1.9630 | 0.0806  | 1690 |
| 1562 | CCDHPPSYPLHF | 1.3695 | 1.1253 | -0.2442 | 1154 |



|                |                                                  |                      |                       |                  |                      |
|----------------|--------------------------------------------------|----------------------|-----------------------|------------------|----------------------|
| 1565           | FGYRPPSYSTAY                                     | 1.0504               | 1.1348                | 0.0845           | 1695                 |
| 1626           | SHPLPPSYRKFL                                     | 1.4332               | 1.4776                | 0.0443           | 1645                 |
| 1633           | RRFSPPSYSKLT                                     | 2.2731               | 2.0770                | -0.1960          | 1257                 |
| 1634           | RRFSPPSYSKLT                                     | 2.1041               | 2.0349                | -0.0692          | 1476                 |
| 1679           | YPSYPPSYPGTW                                     | 0.9885               | 0.9268                | -0.0616          | 1491                 |
| 1691           | RYGPPPSYPNLK                                     | 2.4978               | 2.2485                | -0.2493          | 1136                 |
| 1727           | SGWQPPTYHSGR                                     | 1.5225               | 1.7671                | 0.2446           | 1867                 |
| 1737           | CYSTPPTYFELP                                     | 1.0393               | 0.8885                | -0.1509          | 1339                 |
| 1744           | PCLSPPTYTTFQ                                     | 2.2941               | 2.3712                | 0.0771           | 1687                 |
| 1749           | RYSDPPTYCLPP                                     | 0.3099               | 0.3912                | 0.0813           | 1691                 |
| 1769           | RSPLPPTYLRPF                                     | 1.3843               | 1.4697                | 0.0854           | 1697                 |
| 1773           | RVYQPPTYNRII                                     | 1.0985               | 1.0002                | -0.0983          | 1430                 |
| 1778           | CGLIPPTYRGVW                                     | 2.4652               | 2.2284                | -0.2367          | 1169                 |
| 1806           | YSVPPPVGCHT                                      | 1.9514               | 1.7529                | -0.1986          | 1252                 |
| 1849           | RNYLPPVYSQRG                                     | 1.3437               | 1.4193                | 0.0756           | 1684                 |
| 1889           | RRRFPPYMRMP                                      | 1.5172               | 1.7063                | 0.1891           | 1811                 |
| 1893           | CQHRPPYGYVK                                      | 2.5398               | 2.7879                | 0.2481           | 1868                 |
| 1896           | KTFRPPYHRNC                                      | 2.1804               | 1.9766                | -0.2037          | 1244                 |
| 1909           | PQRQPPYSCQC                                      | 1.4293               | 1.3804                | -0.0488          | 1512                 |
| 1925           | AYAPPPYCSNI                                      | 0.7414               | 0.7808                | 0.0394           | 1641                 |
| 1964           | YCASPPYYDSS                                      | 1.2512               | 1.1997                | -0.0515          | 1509                 |
| 1965           | CARVPPYYDSS                                      | 2.2009               | 2.0803                | -0.1206          | 1391                 |
| <b>Class 3</b> | <b>Y65C mutant reactivity is greater than wt</b> |                      |                       |                  |                      |
| <b>SPOT#</b>   | <b>sequence</b>                                  | <b>wt reactivity</b> | <b>mut reactivity</b> | <b>log ratio</b> | <b>ranking score</b> |
| 19             | ASLCLPRYSFRR                                     | 1.0750               | 1.5744                | 0.4994           | 1972                 |
| 20             | ASECNPKYSFRR                                     | 2.2143               | 2.4970                | 0.2828           | 1887                 |
| 21             | FHHCHKYSFRR                                      | 2.6667               | 2.9270                | 0.2604           | 1874                 |
| 27             | FLLKLARHSKFG                                     | -1.3762              | -0.7086               | 0.6676           | 1986                 |
| 44             | SAQRSPRALFCL                                     | -0.2453              | 0.6606                | 0.9059           | 1994                 |
| 47             | RREPRPPRAFCL                                     | 1.8190               | 2.4809                | 0.6619           | 1985                 |
| 111            | CVKEPPAYTFRD                                     | 0.6917               | 1.0921                | 0.4004           | 1950                 |
| 112            | CWREPPAYTYRD                                     | 1.3955               | 1.7536                | 0.3581           | 1936                 |
| 113            | CWKEPPAYTFRD                                     | 1.4240               | 1.8236                | 0.3996           | 1949                 |
| 137            | CARVPPAYYDFW                                     | 0.3116               | 0.8852                | 0.5736           | 1980                 |
| 192            | SPHLPPCYQHFN                                     | 1.6007               | 2.0115                | 0.4108           | 1953                 |
| 242            | IRLLPPDYKIQC                                     | 0.2942               | 0.9817                | 0.6875           | 1988                 |
| 405            | KKCFPPFYPSPT                                     | 1.7899               | 2.3292                | 0.5393           | 1976                 |
| 442            | LCGYPPFYSKHH                                     | 1.2482               | 1.8506                | 0.6024           | 1981                 |
| 443            | LCGYPPFYSNHG                                     | 1.1214               | 1.6851                | 0.5637           | 1978                 |
| 444            | LCGFPPFYNTG                                      | 0.4930               | 1.1159                | 0.6229           | 1982                 |
| 562            | PCWFPPGYPETK                                     | 0.3549               | 0.6337                | 0.2787           | 1883                 |
| 563            | PCWFPPGYPEAK                                     | 0.0961               | 0.5850                | 0.4889           | 1969                 |
| 642            | LCGCPPGYRVG                                      | 0.6344               | 1.0303                | 0.3959           | 1947                 |
| 643            | LCGCPPGYFRIG                                     | 0.8003               | 1.0907                | 0.2904           | 1893                 |
| 651            | NCLCPPGYTGSR                                     | 1.2272               | 1.5436                | 0.3164           | 1916                 |
| 721            | KVTLPPHYRYGM                                     | 1.5670               | 1.8938                | 0.3268           | 1919                 |
| 722            | LVNMPPHYRYLC                                     | 0.8675               | 1.1957                | 0.3282           | 1921                 |
| 733            | KRFTPPIYQPKF                                     | 1.6847               | 1.9363                | 0.2516           | 1871                 |
| 743            | CTSKPPIYLQHQ                                     | 2.0199               | 2.3614                | 0.3415           | 1929                 |
| 747            | IYRKPPYKQHV                                      | 2.0337               | 2.3255                | 0.2919           | 1895                 |
| 748            | IYRKPPYKQHR                                      | 2.2479               | 2.5280                | 0.2800           | 1885                 |
| 756            | PCLSPPIYTTFQ                                     | 0.9647               | 1.3951                | 0.4305           | 1958                 |
| 785            | CMAVPPKYRHMV                                     | 2.6060               | 3.0319                | 0.4259           | 1955                 |
| 825            | SVCIPPKYGYLG                                     | 1.4262               | 1.7667                | 0.3405           | 1928                 |

|      |              |        |        |        |      |
|------|--------------|--------|--------|--------|------|
| 831  | YRSTPPLYRHAA | 1.8303 | 2.4020 | 0.5717 | 1979 |
| 858  | YCAKPPLYNWND | 1.8781 | 2.3700 | 0.4919 | 1971 |
| 919  | RNLPPPLYRVPV | 0.9184 | 1.5689 | 0.6505 | 1984 |
| 971  | YCTLPPMYPGSS | 1.4188 | 1.9428 | 0.5239 | 1975 |
| 979  | YNNEPPMYRKGT | 0.9346 | 1.6188 | 0.6841 | 1987 |
| 1015 | YGMVPPNYCSGP | 0.6408 | 1.4722 | 0.8314 | 1993 |
| 1075 | LLCTPPPYAHGR | 1.6828 | 2.2245 | 0.5417 | 1977 |
| 1102 | LYGCPPPYHTFK | 1.9172 | 2.1959 | 0.2788 | 1884 |
| 1113 | SRREPPPYGYRK | 1.8677 | 2.1556 | 0.2879 | 1891 |
| 1468 | RLWRPPRYPRKT | 0.8472 | 1.1462 | 0.2990 | 1899 |
| 1525 | KSSGPPSYFIKR | 1.6620 | 1.9123 | 0.2503 | 1869 |
| 1550 | CSSCPPSYGGSC | 1.0701 | 1.3718 | 0.3017 | 1903 |
| 1563 | CGTYPPSYNLTF | 1.5994 | 1.9695 | 0.3701 | 1939 |
| 1632 | RKLSPPSYCKLA | 2.1063 | 2.3838 | 0.2774 | 1882 |
| 1801 | CFQYPPVYVGKI | 0.4449 | 0.7294 | 0.2845 | 1888 |
| 1804 | APRRPPVYKFI  | 1.4155 | 1.8425 | 0.4270 | 1956 |
| 1910 | ITQSPPYRCVC  | 0.9244 | 1.2341 | 0.3098 | 1908 |

The relative intensities of wt and the Y65C WW domain binding to SPOT peptide arrays was assessed as follows: To avoid as much saturated array elements as possible, the lower quartile cutting value of pixel intensity was chosen to calculate signal intensity (SI) using an image analysis software (genespotter v2.6.0, MicroDiscovery GmbH). To allow a robust comparison, SI was scaled by log-2 and centered by subtracting the log-2 product of the median value over both datasets. The resulting transformation is referred to as the reactivity (see Figures below). The effect of the mutation was calculated by subtracting the wt reactivity from the mutant reactivity. The resulting log ratio was used to classify peptides in terms of the relative reactivity. Log ratio values lower than -0.2500 classified peptides with mutant reactivity significantly lower than wild-type. This class comprises 1116 out of total 1958 peptides. Inversely, log ratio values greater than 0.2500 classified peptides with mutant reactivity significantly greater than wt. This class comprises 123 out total 1958 peptides. Data was ranked from the lowest log ratio value (-1.7) to the highest one (0.9). (See Table 3 and Figures below).

**The data shown in figures below was filtered to eliminate data from spots where the image analysis software reported no signals on both datasets. Class 1: A list of 288 peptides for which the value of ,no signal' is false and log ratio < -0.2500 is true . Class 2: A list of 161 peptides for which the value of ,no signal' is false and -0.2501 > log ratio > 0.2501 is true. Class 3: A list of 47 peptides for which the value of ,no signal' is false and log ratio > 0.2500 is true.**

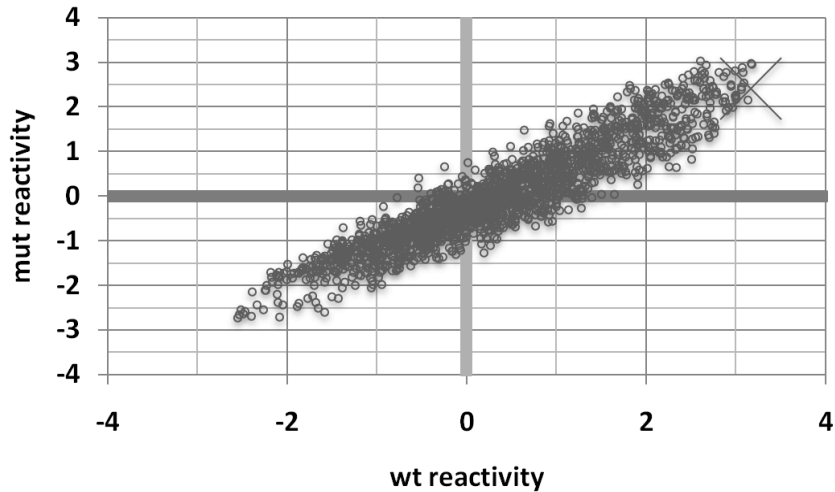

Scatter plot of Y65C mutant WW domain reactivity as a function of wild-type reactivity. The datasets show a good correlation ( $R^2 = 0.8767$ ) but the slope shows a significant departure from 1 (slope = 0.8641). This is in agreement with the observation that the binding profile of both constructs of the WW domain are generally similar, but that the mutant reactivity is compromised. The x-cross shows the data point corresponding to the peptide SPPGPPPYGKRA (SPOT#: 1221). Strong reactivities for this peptide were recorded in both datasets.

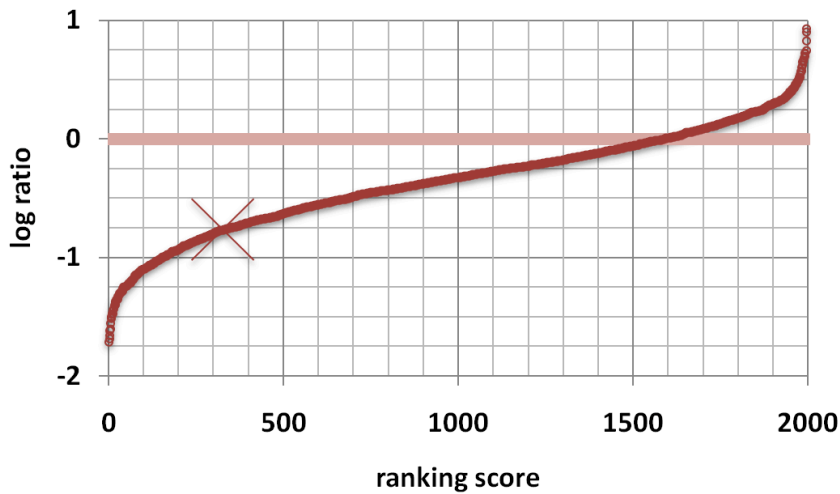

Distribution of the calculated log ratio (log ratio = mut reactivity - wt reactivity). This parameter indicates the effect of the mutation with negative values corresponding to binding events where mutant reactivity is less than the wild-type (suggesting a loss of function) and with positive values corresponding to the Y65C mutant reactivity greater than that of the wild-type. The x-cross shows the data point corresponding to the peptide SPPGPPPYGKRA (SPOT#: 1221). A log ratio value of -0.7664 indicates a considerably compromised binding behaviour of the Y65C mutant PQBP1-WW to this selected peptide.
