# Supplementary material
Source: PubMed Central journal article supplement (PMC2885219)

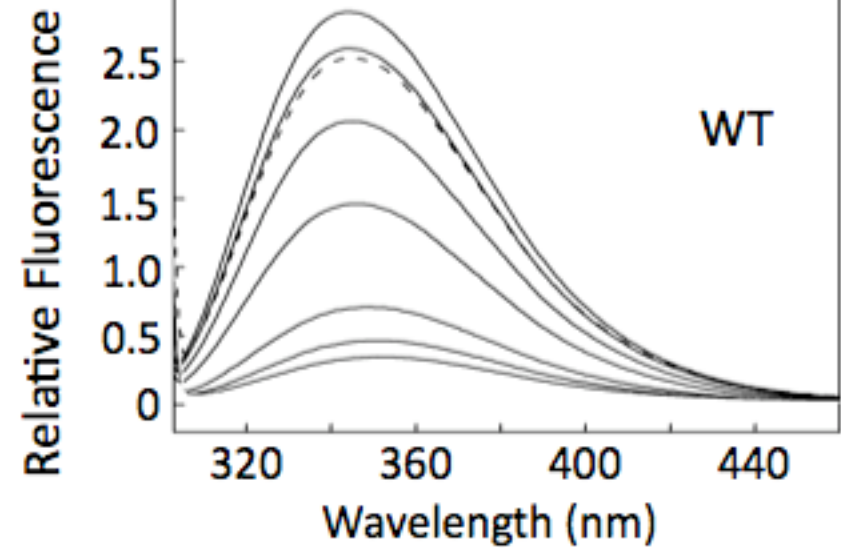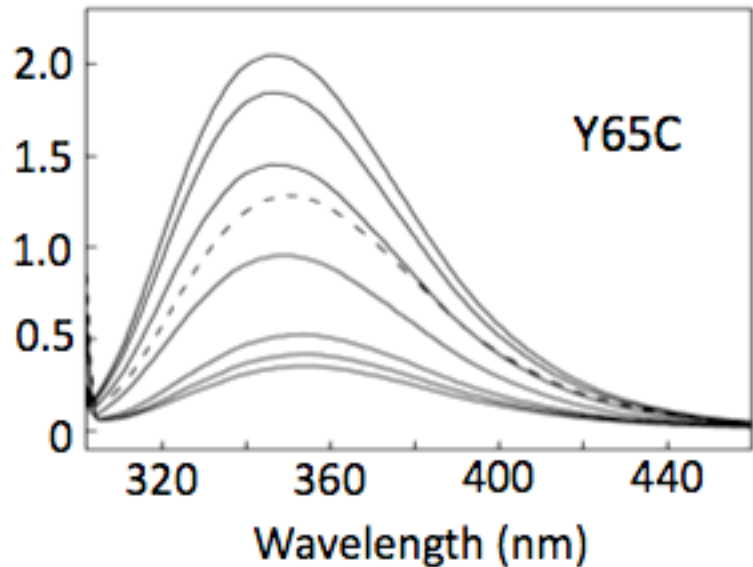

Supplement: supp_M109.084525_jbc.M109.084525-4.pdf [file supp_M109.084525_jbc.M109.084525-4.pdf]

Supplementary Figure 5, Tapia et al.,

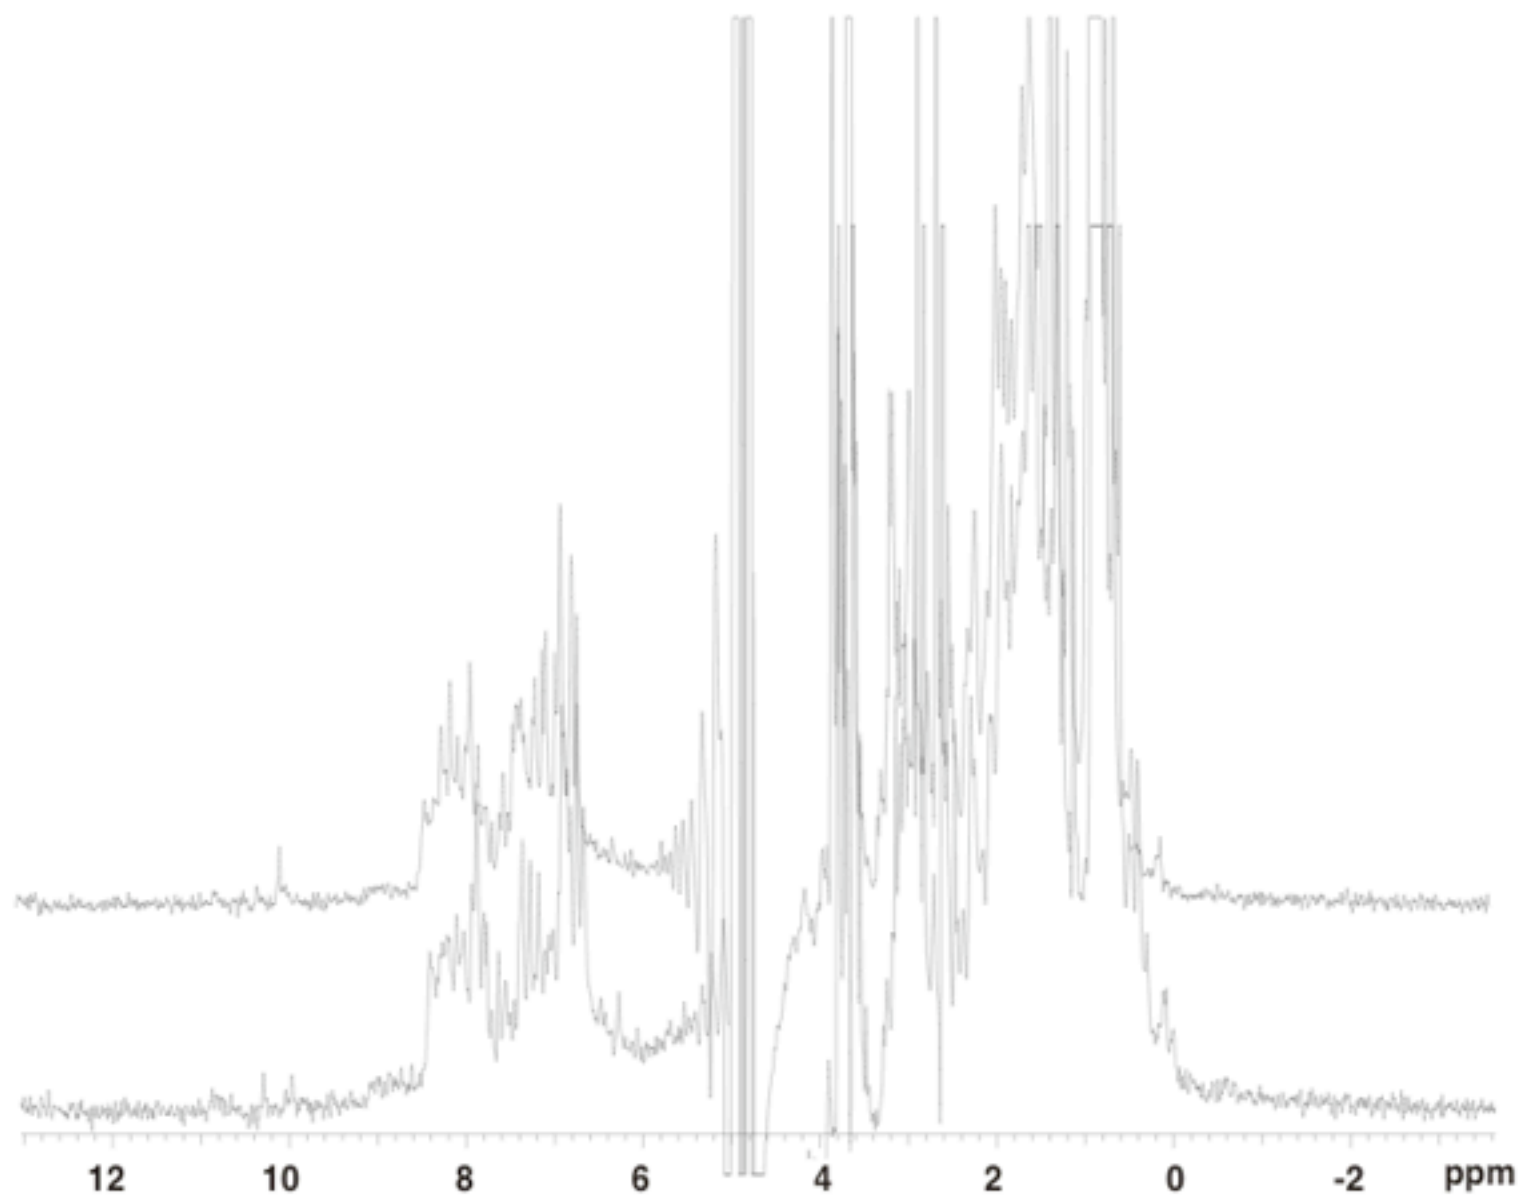

Supplement: supp_M109.084525_jbc.M109.084525-5.pdf [file supp_M109.084525_jbc.M109.084525-5.pdf]

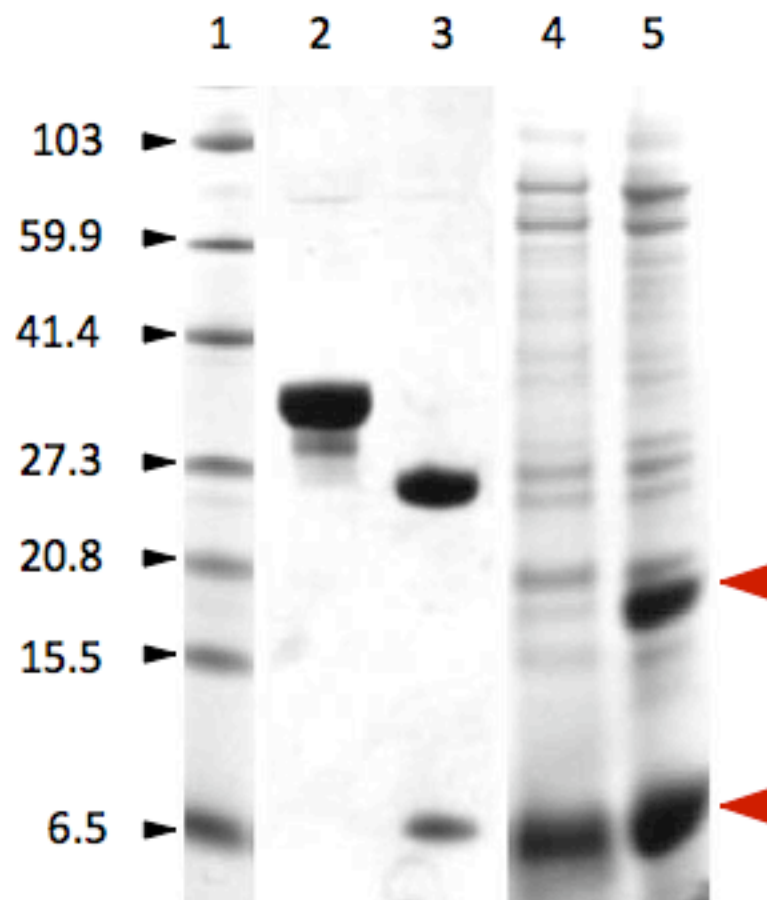

Supplement: supp_M109.084525_jbc.M109.084525-6.pdf [file supp_M109.084525_jbc.M109.084525-6.pdf]
